# Supplementary material for: Acid sphingomyelinase deactivation post-ischemia promotes brain angiogenesis and remodeling by small extracellular vesicles
Source: PubMed Central journal article supplement (PMC9424180; doi:10.1007/s00395-022-00950-7), 2022-08-29
Supplement: 395_2022_950_MOESM1_ESM.pdf [file 395_2022_950_MOESM1_ESM.pdf]

# SUPPLEMENTARY FIGURES

## Acid sphingomyelinase deactivation post-ischemia promotes brain angiogenesis and remodeling by small extracellular vesicles

### Basic Research in Cardiology

Ayan Mohamud Yusuf,<sup>1,2</sup> Nina Hagemann,<sup>1,2</sup> Xiaoni Zhang,<sup>1,2</sup> Maria Zafar,<sup>1,2</sup> Tanja Hussner,<sup>1,2</sup> Carolin Bromkamp,<sup>1,2</sup> Carlotta Martiny,<sup>1,2</sup> Tobias Tertel,<sup>3</sup> Verena Börger,<sup>3</sup> Fabian Schumacher,<sup>4,5,6</sup> Fiorella A. Solari,<sup>7</sup> Mike Hasenberg,<sup>8</sup> Christoph Kleinschnitz,<sup>1,2</sup> Thorsten R. Doeppner,<sup>1,2,9</sup> Burkhard Kleuser,<sup>5</sup> Albert Sickmann,<sup>7,10,11</sup> Matthias Gunzer,<sup>7,8</sup> Bernd Giebel,<sup>3</sup> Richard Kolesnick,<sup>12</sup> Erich Gulbins,<sup>4</sup> Dirk M. Hermann<sup>1,2\*</sup>

<sup>1</sup>Department of Neurology, <sup>2</sup>Center for Translational and Behavioral Neurosciences, <sup>3</sup>Institute of Transfusion Medicine and <sup>4</sup>Institute of Molecular Biology, University Hospital Essen, Essen, Germany, <sup>5</sup>Department of Toxicology, University of Potsdam, Nuthetal, Germany, <sup>6</sup>Institute of Pharmacy, Freie Universität Berlin, Berlin, Germany, <sup>7</sup>Leibniz-Institut für Analytische Wissenschaften-ISAS-e.V., Dortmund, Germany, <sup>8</sup>Institute of Immunology and Experimental Imaging, University Hospital Essen, Essen, Germany, <sup>9</sup>Department of Neurology, University Medicine Göttingen, Göttingen, Germany, <sup>10</sup>Medizinisches Proteom-Center (MPC), Ruhr University, Bochum, Germany, <sup>11</sup>Department of Chemistry, College of Physical Sciences, University of Aberdeen, Aberdeen, Scotland, U.K., <sup>12</sup>Memorial Sloan Kettering Cancer Center, New York, New York, U.S.A.; \*corresponding author.

Correspondence: Prof. Dirk M. Hermann, MD, Department of Neurology, University Hospital Essen, Hufelandstr. 55, D-45122 Essen, Germany, E-Mail: dirk.hermann@uk-essen.de

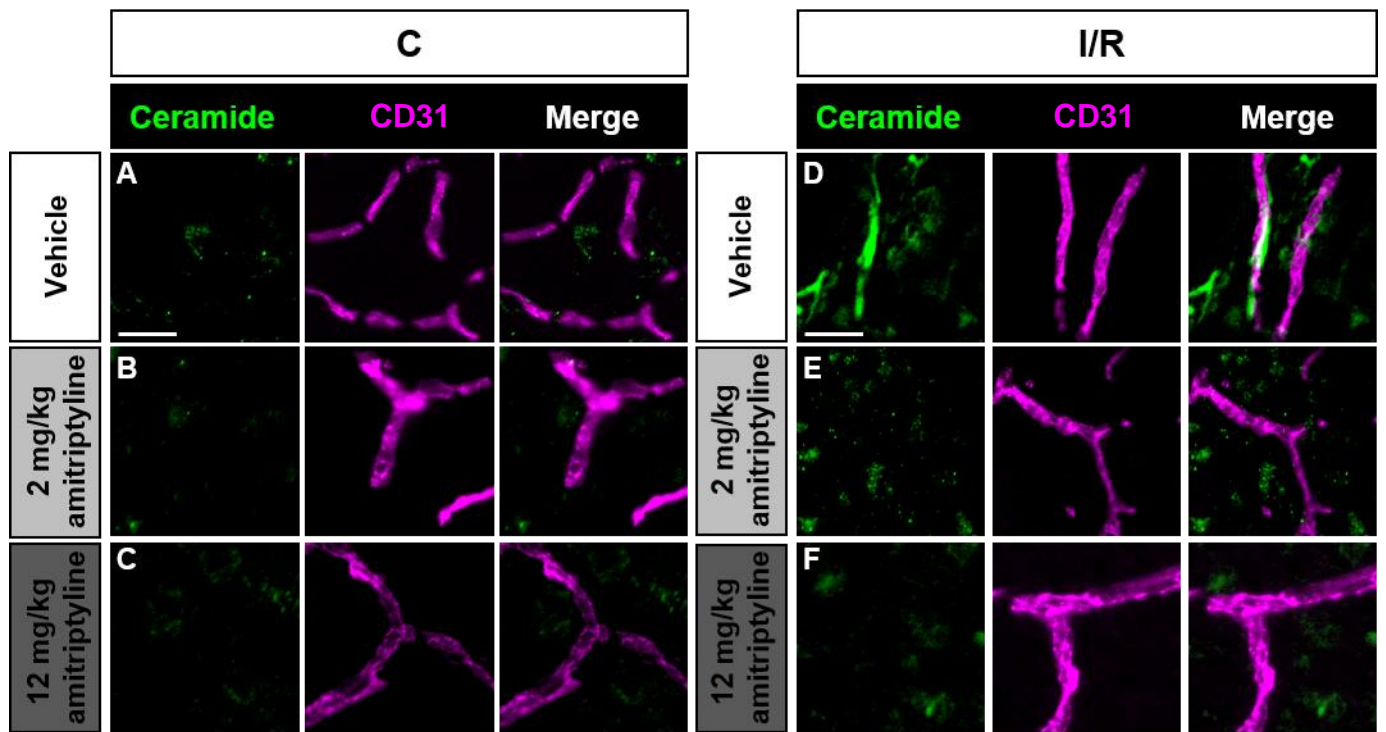

**Supplementary Figure 1. Acid sphingomyelinase (Asm) product ceramide accumulates in cerebral microvessels after ischemia/ reperfusion (I/R) *in vivo*.** Immunohistochemistry for ceramide in the contralateral non-ischemic control striatum (C) and reperfused ischemic striatum (I/R) of C57BL/6j mice exposed to transient middle cerebral artery occlusion (MCAO), which were intraperitoneally treated with vehicle or amitriptyline (2 or 12 mg/kg b.w., b.i.d.) immediately after I/R, followed by animal sacrifice after 24 hours. Scale bar, 50  $\mu$ m. Data are representative for 3 independent studies.

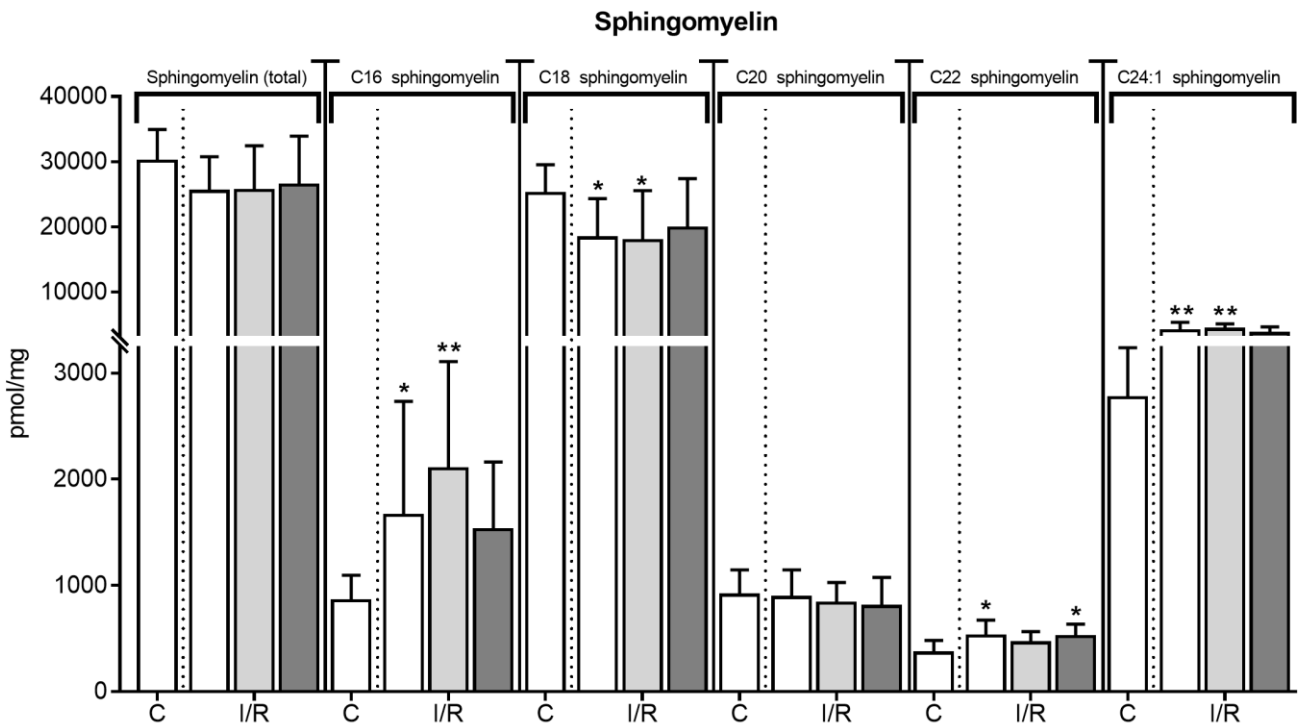

**Supplementary Figure 2. Asm inhibitor amitriptyline does not change cerebral sphingomyelin levels after I/R *in vivo*.** Total sphingomyelin, C16 sphingomyelin, C18 sphingomyelin, C20 sphingomyelin, C22 sphingomyelin and C24:1 sphingomyelin content in the contralateral non-ischemic control striatum (C) and reperfused ischemic striatum (I/R) measured by liquid chromatography tandem-mass spectrometry (LC-MS/MS) in C57BL/6j mice exposed to transient MCAO, which were intraperitoneally treated with vehicle or amitriptyline (2 or 12 mg/kg b.w., b.i.d.) starting 24 hours post-MCAO, followed by animal sacrifice after 14 days. Data are means  $\pm$  SD values. \* $p \leq 0.05$ /\*\* $p \leq 0.01$  compared with non-ischemic C (n=7-9 animals/group; analyzed by one-way ANOVA followed by LSD tests).

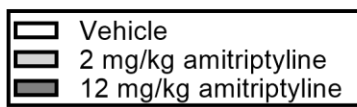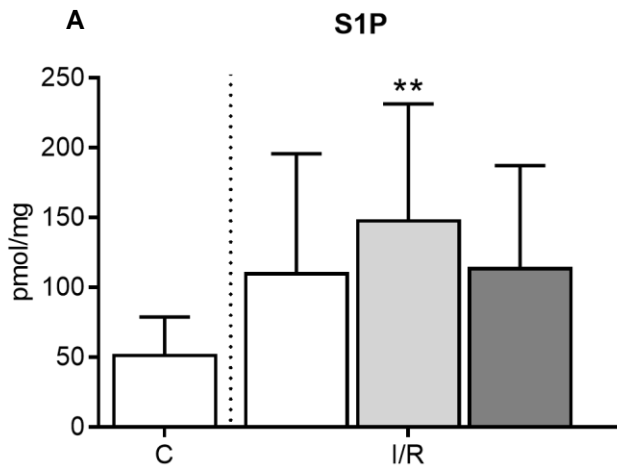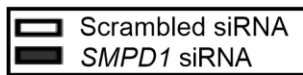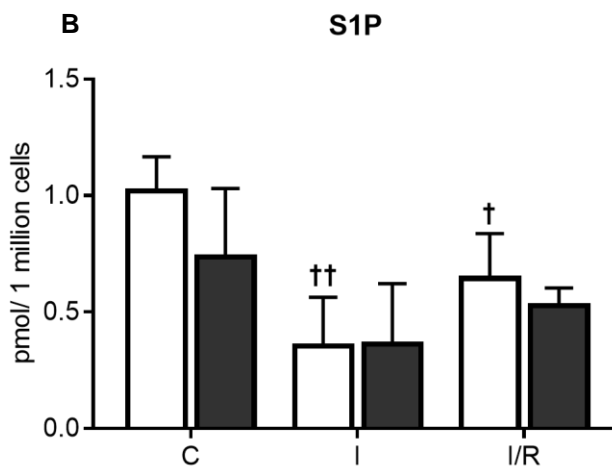

**Supplementary Figure 3. S1P levels are not changed by Asm inhibitor amitriptyline after I/R *in vivo* and by *SMPD1* knockdown in cerebral microvascular endothelial cells *in vitro*.** S1P content, measured by LC-MS/MS in **(A)** the reperfused ischemic striatum (labeled I/R) and contralateral non-ischemic striatum (labeled C), which were intraperitoneally treated with vehicle or amitriptyline (2 or 12 mg/kg b.w., b.i.d.) with 24 hours delay, followed by animal sacrifice after 14 days and in **(B)** hCMEC/D3 transfected with scrambled siRNA or *SMPD1* siRNA and exposed to non-ischemic control condition (C), OGD (that is, ischemia; I) or ischemia followed by reoxygenation/glucose re-supplementation (I/R). Data are means  $\pm$  SD values. \*\* $p \leq 0.01$  compared with non-ischemic C (n=7-8 animals/group [in **(A)**] and  $\dagger p \leq 0.05$ / $\dagger\dagger p \leq 0.01$  compared with corresponding C (n=3 independent samples/group [in **(B)**]; analyzed by two-way ANOVA followed by LSD tests).

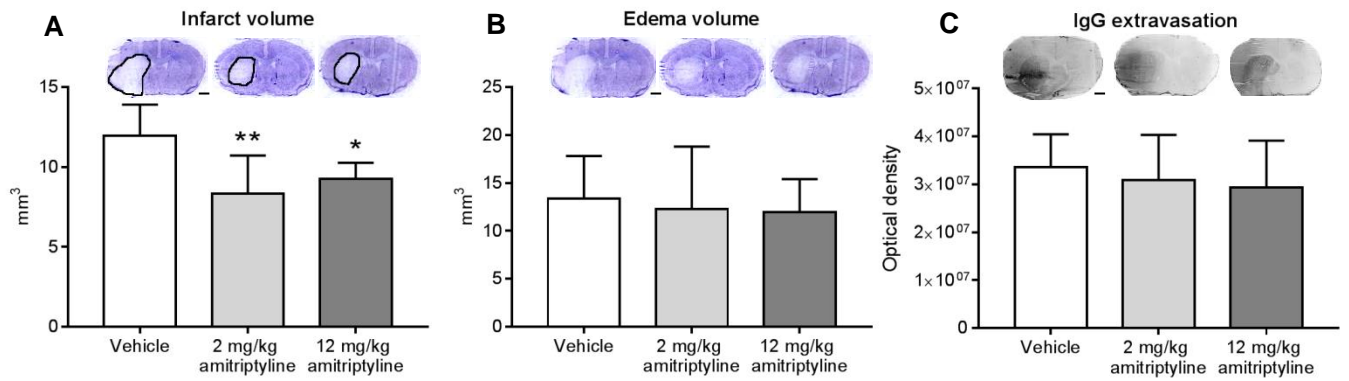

**Supplementary Figure 4. Asm inhibitor amitriptyline reduces ischemic injury *in vivo*, when administered immediately after I/R.** (A) Infarct volume and (B) brain edema evaluated on cresyl violet-stained brain sections, and (C) serum IgG extravasation as a marker of blood-brain barrier permeability by immunohistochemistry in the reperfused ischemic striatum of mice exposed to transient MCAO, which were intraperitoneally treated with vehicle or amitriptyline (2 or 12 mg/kg b.w., b.i.d.) immediately after MCAO, followed by animal sacrifice after 24 hours. Representative brain sections are also shown. Data are means  $\pm$  SD values. \* $p \leq 0.05$ /\*\* $p \leq 0.01$  compared with corresponding vehicle ( $n=7-8$  animals/group; analyzed by one-way ANOVA followed by LSD tests). Scale bar, 1000  $\mu$ m.

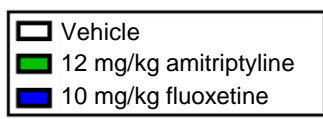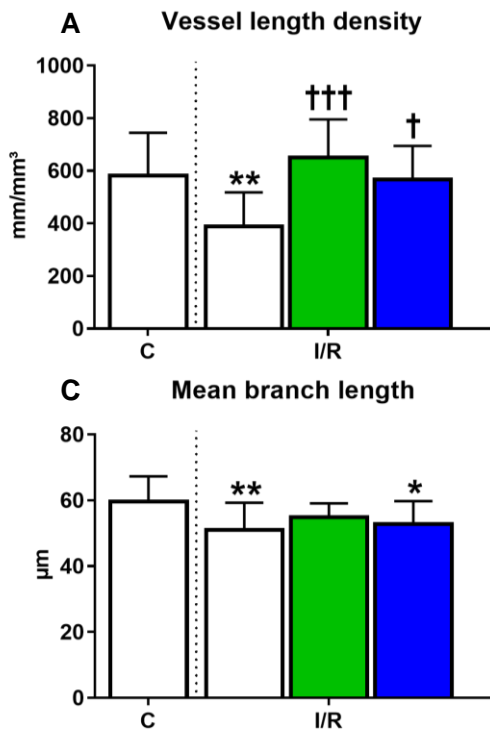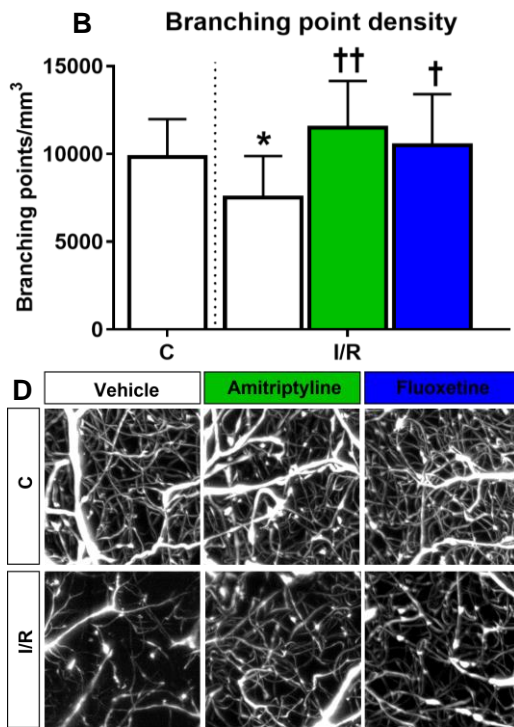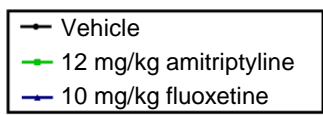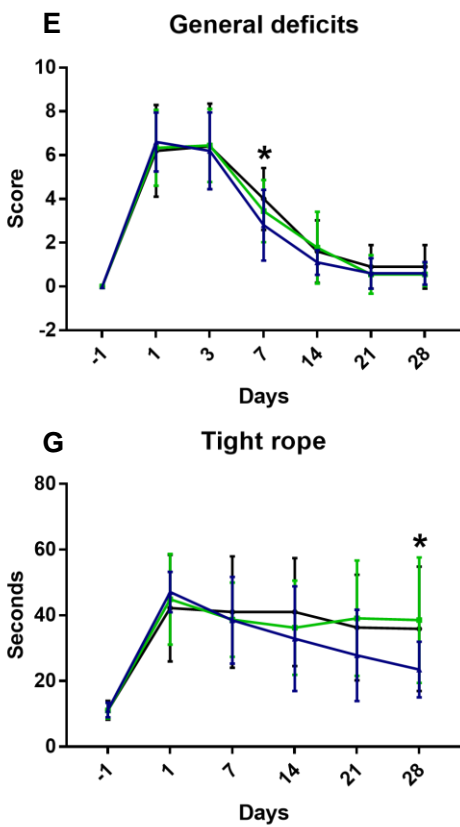

**Supplementary Figure 5. Asm inhibitor fluoxetine induces angiogenesis and enhances motor-coordination performance after I/R.** (A) Total microvascular length, (B) branching point density and (C) mean microvascular branch length, evaluated by LSM in I/R and C of wildtype MCAO mice treated with vehicle, amitriptyline (12 mg/kg b.w.) or fluoxetine (10 mg/kg b.w.). Maximum projection LSM images are illustrated in (D). (E) General and (F) focal neurological deficits examined by Clark's neurological score and (G, H) motor-coordination deficits evaluated by tight rope and Rotarod tests. Treatment was initiated 24 hours after MCAO and continued for 28 days. Data are means  $\pm$  S.D. values. \* $p \leq 0.05$ /\*\* $p \leq 0.01$  compared with non-ischemic C; † $p \leq 0.05$ /†† $p \leq 0.01$ /††† $p \leq 0.001$  compared with corresponding vehicle [in (A-C)] or \* $p \leq 0.05$  fluoxetine compared with vehicle [in (E-H)] (n=7-8 animals/group; analyzed by one-way ANOVA followed by LSD tests ([in (A-C)]; n=9-10 animals/group; analyzed by repeated measurement ANOVA followed by two-tailed t-tests [in (E-H)]).

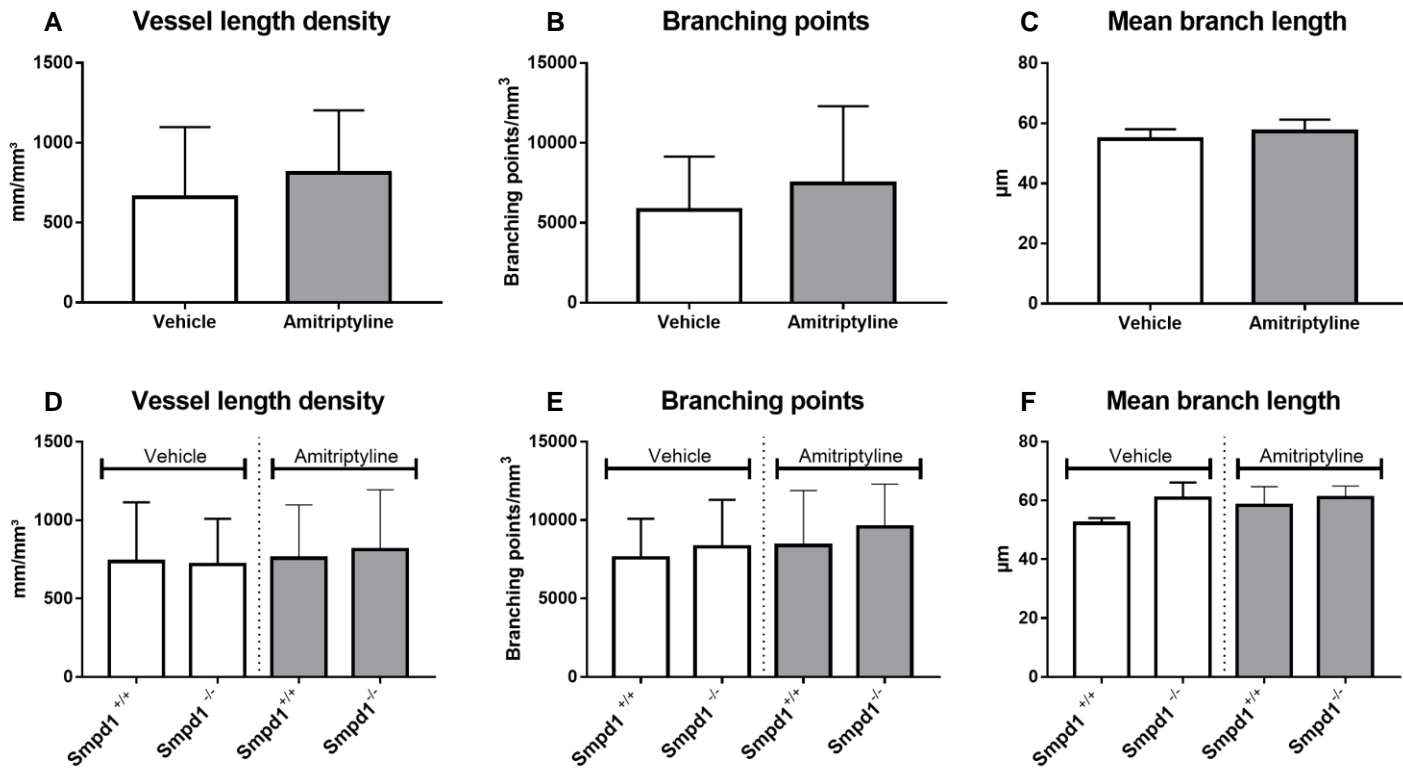

**Supplementary Figure 6. Asm inhibitor amitriptyline does not modulate the cerebral microvessel characteristics in healthy mice.** (A) Total microvascular length, (B) branching point density and (C) mean microvascular branch length, evaluated by LSM in healthy C57bl/6 mice treated with vehicle or amitriptyline (12 mg/kg b.w., b.i.d.) for 14 days. (D) Microvascular length, (E) branching point density and (F) mean branch length in *Smpd1*<sup>+/+</sup> (wildtype) and *Smpd1*<sup>-/-</sup> (that is, ASM-deficient) healthy mice treated with vehicle or amitriptyline (12 mg/kg b.w., b.i.d.) for 14 days. Data are means ± SD values (n=3-4 animals/group; analyzed by one-way ANOVA followed by LSD tests).

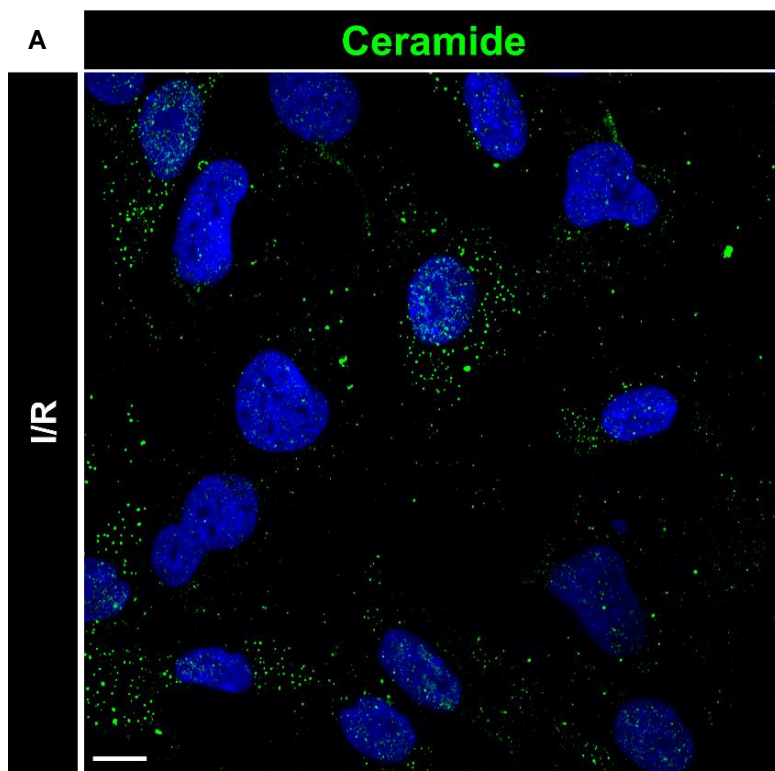

**B Intracellular ceramide-rich vesicles**

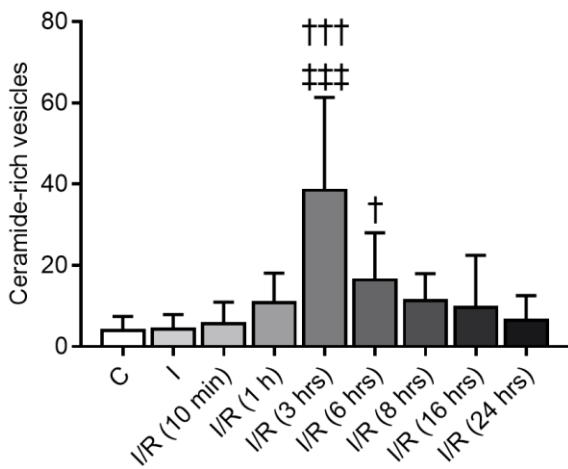

**C Size of ceramide-rich intracellular vesicles**

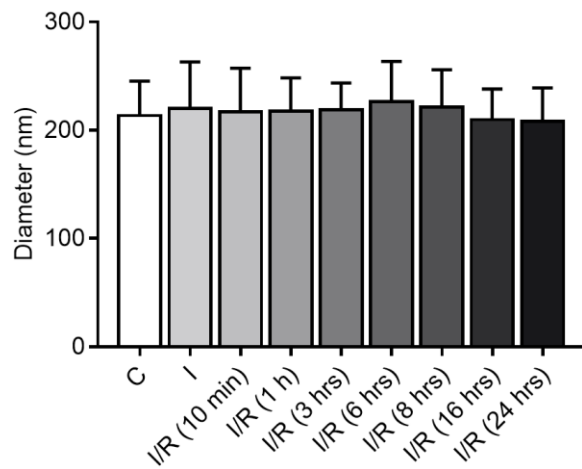

**Supplementary Figure 7. I/R induces the intracellular formation of ceramide-rich vesicles in cerebral microvascular endothelial cells *in vitro*.**

**(A)** Immunohistochemistry for ceramide (in green) in hCMEC/D3 exposed to 24 hours OGD (that is, ischemia) followed by 3 hours reoxygenation/glucose re-supplementation (I/R). Scale bar, 10  $\mu$ M. **(B)** Number and **(C)** size of intracellular ceramide-rich vesicles evaluated by Cell Profiler in hCMEC/D3 exposed to non-ischemic control condition (C), 24 hours ischemia (I) or 24 hours ischemia followed by different durations of reoxygenation/glucose re-supplementation (I/R). Data are means  $\pm$  SD values.  $\dagger p \leq 0.05$ / $\dagger\dagger p \leq 0.001$  compared with corresponding C;  $\#\#\# p \leq 0.001$  compared with corresponding I (n=3-8 independent samples/group [in **(B)**]; n=3-4 independent samples/group [in **(C)**]; analyzed by one-way ANOVA followed by LSD tests).



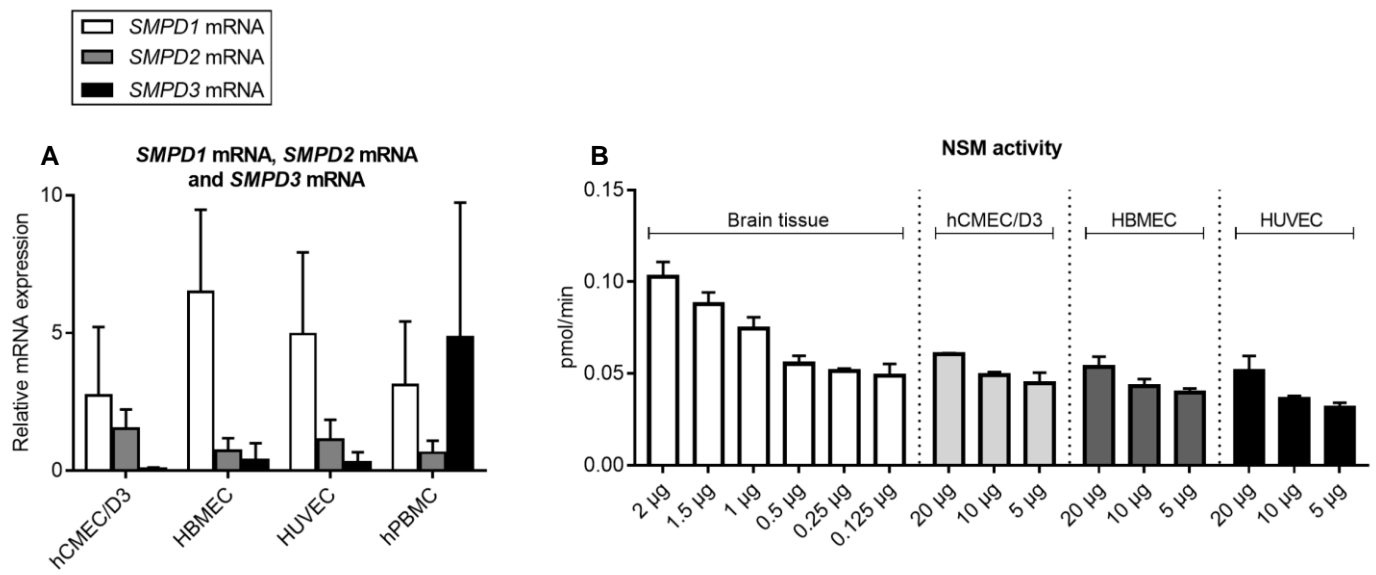

**Supplementary Figure 8. ASM is the predominant sphingomyelinase in endothelial cells. (A)** *SMPD1*, *SMPD2* and *SMPD3* mRNA level evaluated by polymerase-chain reaction (PCR) in hCMEC/D3, primary human brain microvascular endothelial cells (HBMEC), human umbilical vein endothelial cells (HUVEC) and human peripheral blood mononuclear cells (hPBMC) and **(B)** magnesium dependent NSM activity examined using BODIPY-labeled sphingomyelin as substrate in whole brain tissue, hCMEC/D3, HBMEC and HUVEC. Data are means  $\pm$  SD values (n=3 independent samples/group).

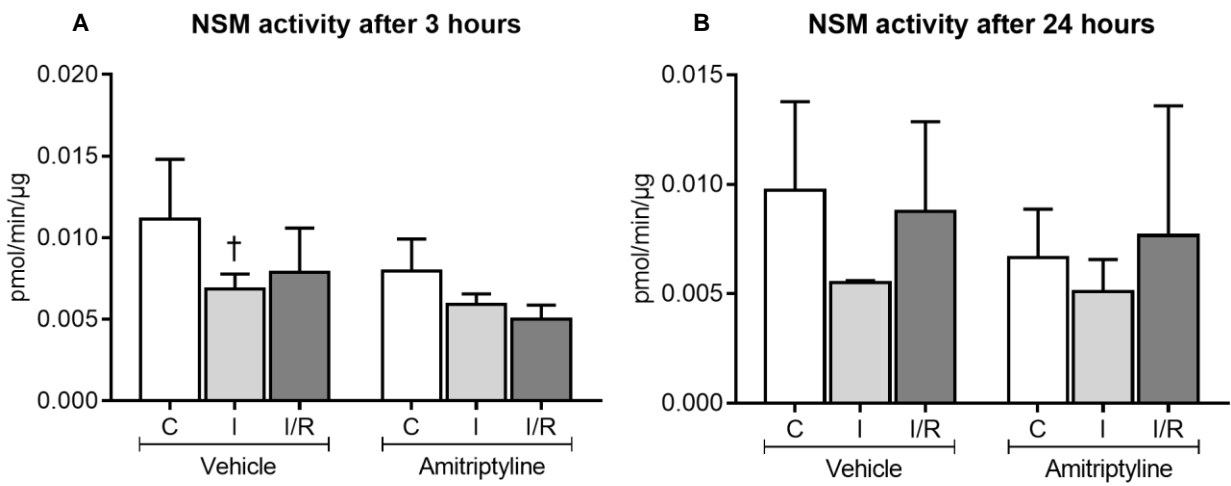

**Supplementary Figure 9. Amitriptyline does not affect NSM activity in cerebral microvascular endothelial cells *in vitro*.** Magnesium dependent NSM activity examined in hCMEC/D3 exposed to **(A)** non-ischemic control condition (C), 3 hours OGD (that is, ischemia; I), or 24 hours ischemia followed by 3 hours reoxygenation/glucose re-supplementation (I/R), or to **(B)** non-ischemic C, 24 hours ischemia (I) or 24 hours ischemia followed by 24 hours reoxygenation/glucose re-supplementation (I/R), which were treated with vehicle or amitriptyline (50  $\mu$ M) during 3 hours (in **(A)**) or 24 hours (in **(B)**). Data are means  $\pm$  SD values (n=3 independent samples/group). <sup>†</sup>p $\leq$ 0.05 compared with corresponding C (n=3 independent samples/group; analyzed by one-way ANOVA followed by LSD tests).

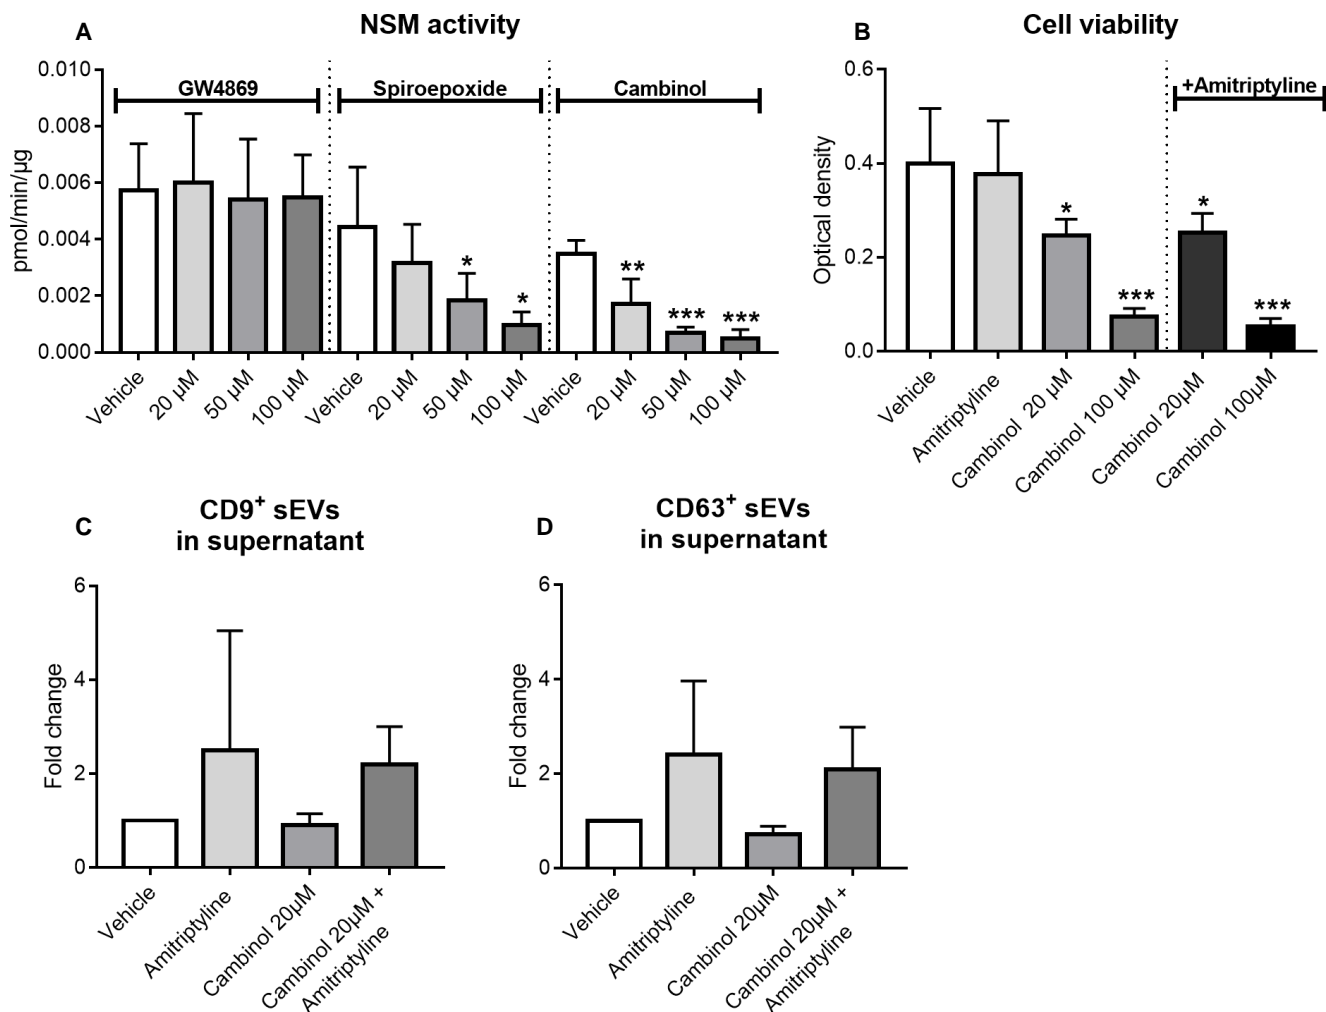

**Supplementary Figure 10. NSM inhibition does not influence sEV release in cerebral microvascular endothelial cells *in vitro*.** (A) Magnesium dependent NSM activity examined in hCMEC/D3 treated with indicated concentrations of GW4869, spiroepoxide or cambinol using BODIPY-labeled sphingomyelin as substrate. (B) Endothelial viability assessed by the 3-(4,5-dimethylthiazol-2-yl)-2,5-diphenyltetrazolium bromide (MTT) assay in hCMEC/D3 treated with vehicle, amitriptyline (50  $\mu\text{M}$ ) and/ or cambinol (20  $\mu\text{M}$  or 100  $\mu\text{M}$ ). Concentration of (C) CD9<sup>+</sup> and (D) CD63<sup>+</sup> sEVs in the supernatant of hCMEC/D3 treated with vehicle, amitriptyline (50  $\mu\text{M}$ ) and/ or cambinol (20  $\mu\text{M}$ ). sEV concentration was evaluated by AMNIS flow cytometry. Data are means  $\pm$  SD values. \* $p \leq 0.05$ /\*\* $p \leq 0.01$ /\*\*\* $p \leq 0.001$  compared with vehicle ( $n=3$  independent samples/group [in (A, B)];  $n=3-7$  independent samples/group [in (C, D)]; analyzed by one-way or two-way ANOVA followed by LSD tests [in (A, B)] or two-tailed paired t tests [in (C, D)].

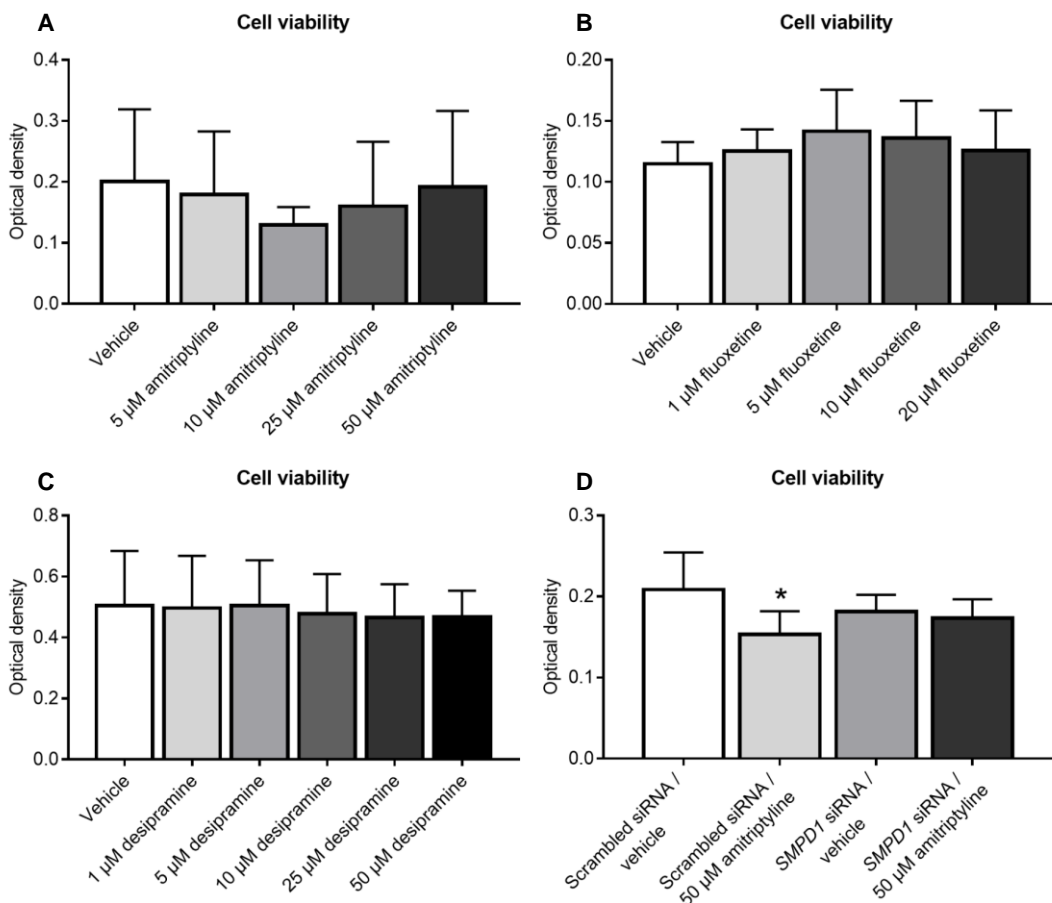

**Supplementary Figure 11. ASM inhibitors do not influence the survival of human cerebral microvascular endothelial cells *in vitro*.** Endothelial viability assessed by MTT assay in non-ischemic hCMEC/D3 treated with **(A)** vehicle or amitriptyline at defined doses (0-50  $\mu\text{M}$ ), **(B)** vehicle or fluoxetine at defined doses (0-20  $\mu\text{M}$ ) or **(C)** vehicle or desipramine at defined doses (0-50  $\mu\text{M}$ ), or in **(D)** in non-ischemic hCMEC/D3 transfected with scrambled siRNA or *SMPD1* siRNA that were treated with vehicle or amitriptyline (50  $\mu\text{M}$ ). Data are means  $\pm$  SD values. \* $p < 0.05$  compared with scrambled siRNA/ vehicle ( $n = 3$  independent samples/group [in **(A, B)**];  $n = 4$  independent samples/group [in **(C, D)**]; analyzed by one-way ANOVA followed by LSD tests).

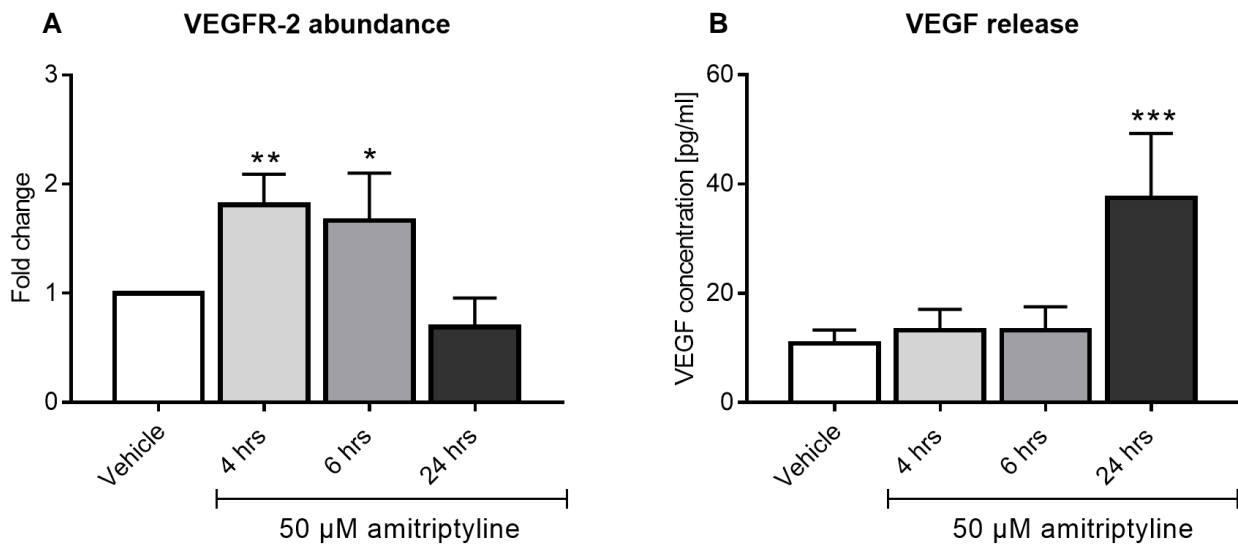

**Supplementary Figure 12. ASM inhibitor amitriptyline increases VEGFR2 abundance and VEGF secretion by mouse cerebral microvascular endothelial cells. (A)** VEGFR2 abundance evaluated by Western blot and **(B)** VEGF concentration in supernatant evaluated by enzyme-linked immunosorbent assay (ELISA) of non-ischemic mouse brain endothelial cells belonging to the cell line bEND5, which were treated with vehicle or amitriptyline for defined exposure times (0-24 hours) at a 50 μM concentration. Data are means ± SD values. \* $p \leq 0.05$ /\*\* $p \leq 0.01$ /\*\*\* $p \leq 0.001$  compared with corresponding vehicle (n=4 independent samples/group [in **(A-B)**]; analyzed by one-way ANOVA followed by two-tailed paired t-tests [in **(A)**] or LSD tests [in **(B)**]).

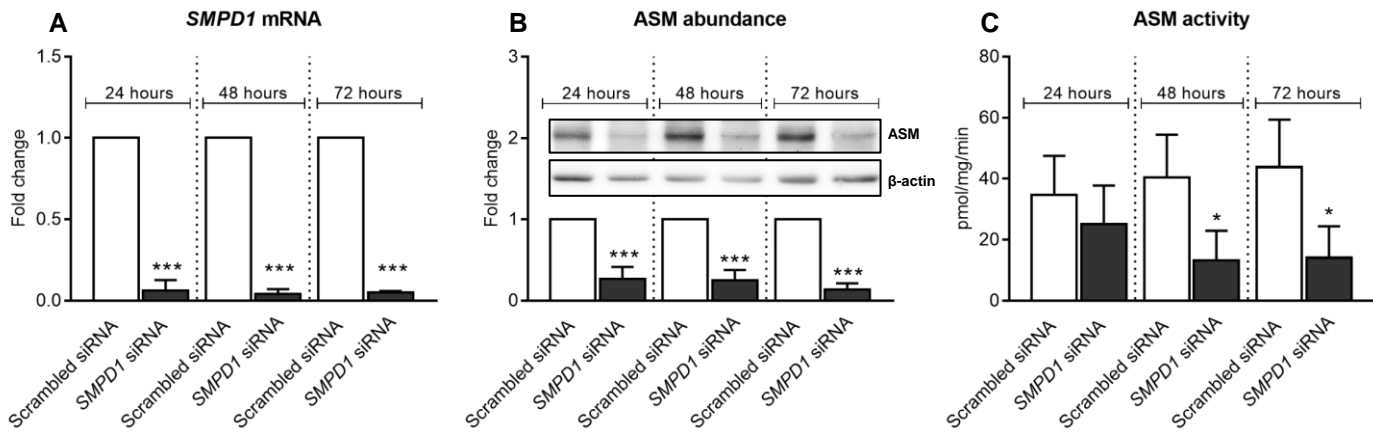

**Supplementary Figure 13. *SMPD1* mRNA level, ASM abundance and ASM activity are effectively downregulated by small-interfering RNA (siRNA) *in vitro*.** (A) *SMPD1* mRNA expression, evaluated by polymerase-chain reaction (PCR), (B) ASM abundance, determined by Western blot and (C) ASM activity, examined using BODIPY-labeled sphingomyelin as substrate, in hCMEC/D3 transfected with scrambled siRNA and *SMPD1* siRNA for 24-72 hours. Data are means  $\pm$  SD values. \* $p \leq 0.05$ /\*\* $p \leq 0.001$  compared with scrambled siRNA (n=3 independent samples/ group [in (A)]; n=4 independent samples/ group [in (B)]; n=3-6 independent samples/ group [in (C)]; analyzed by two-tailed paired [in (A, B)] or unpaired [in (C)] t tests).

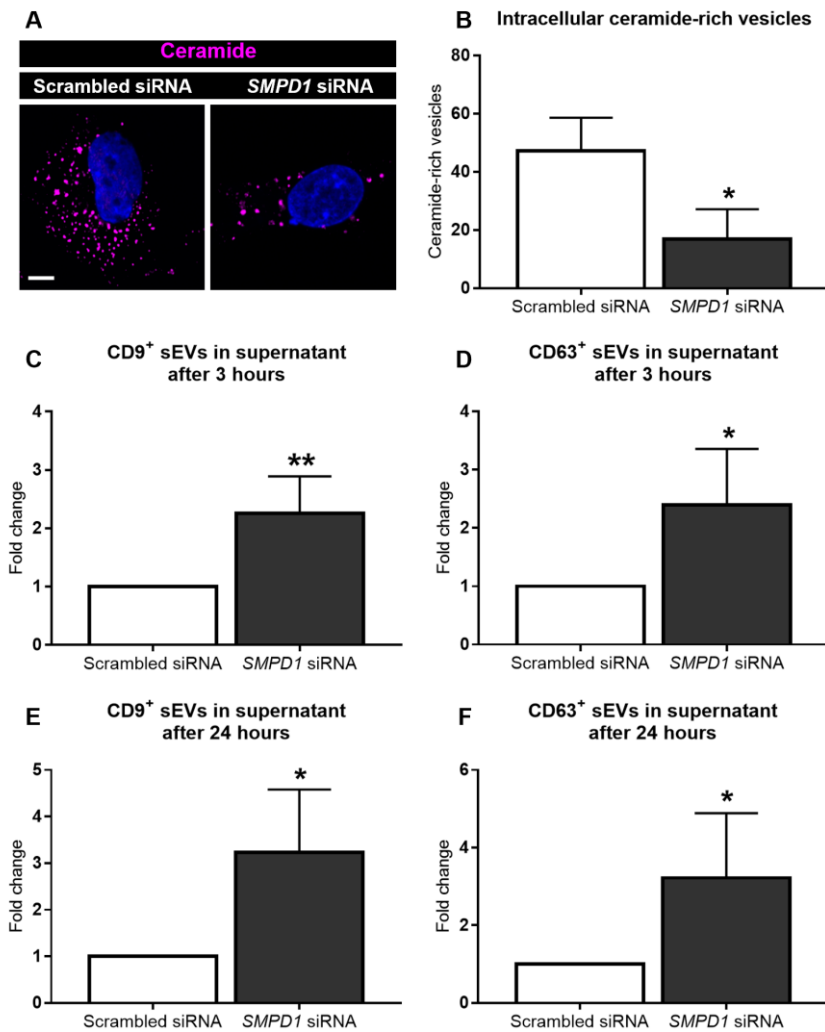

**Supplementary Figure 14. *SMPD1* knockdown reduces the intracellular accumulation of ceramide-rich vesicles after I/R *in vitro* and promotes the extracellular release of vesicles with immunofluorescence exosome characteristics. (A)** Immunohistochemistry for ceramide (in magenta) in hCMEC/D3 exposed to 24 hours OGD (that is, ischemia) followed by 3 hours reoxygenation/glucose re-supplementation, which were transfected with scrambled siRNA (used as control) or *SMPD1* siRNA. Nuclei were counterstained with Hoechst 33342 (in blue). Note that the number of intracellular ceramide-rich vesicles is reduced by *SMPD1* knockdown. Shown is a representative result from 3 independent studies. The density of vesicles evaluated by Cell Profiler is shown in (B). Particle concentration of (C, E) CD9<sup>+</sup> and (D, F) CD63<sup>+</sup> sEVs in the supernatant of hCMEC/D3 exposed to 24 hours ischemia followed by 3 hours reperfusion (in (C, D)) or 24 hours reperfusion (in (E, F)), which were transfected with scrambled siRNA (used as control) or *SMPD1* siRNA. The particle concentration was evaluated by AMNIS image flow cytometry. Note that the number of CD9<sup>+</sup> and CD63<sup>+</sup> sEVs is increased by *SMPD1* knockdown. Data are means  $\pm$  SD values. \* $p < 0.05$ /\*\* $p < 0.01$  compared with corresponding scrambled siRNA (n=3 independent samples/group [in (B)]; n=4 independent samples/group [in (C-F)]; analyzed by two-tailed unpaired [in (B)] or paired [in (C-F)] t tests). Scale bar, 10  $\mu$ m (in (A)).

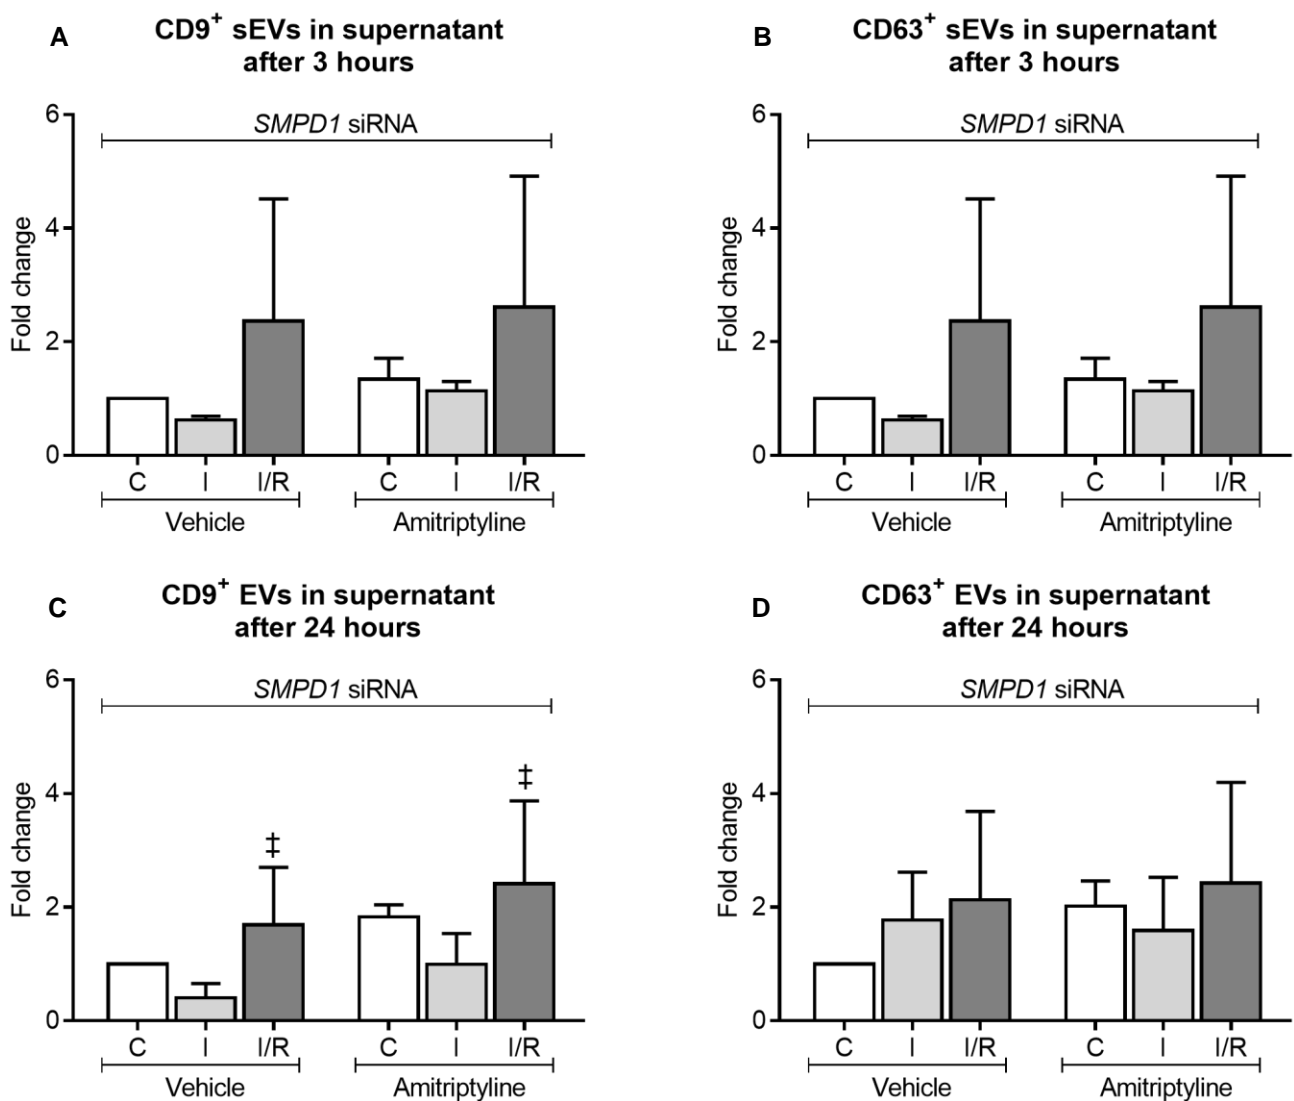

**Supplementary Figure 15. ASM inhibitor amitriptyline does not modify sEV release after *SMPD1* knockdown in cerebral microvascular endothelial cells *in vitro*.** Concentration of **(A, C)** CD9<sup>+</sup> and **(B, D)** CD63<sup>+</sup> sEVs in the supernatant of hCMEC/D3 exposed to 3 hours control condition (C), 3 hours OGD (that is, ischemia, I) or 24 hours/3 hours ischemia followed by reoxygenation/glucose re-supplementation (I/R) (in **(A, B)**) or 24 hours C, 24 hours I or 24 hours/24 hours I/R (in **(C, D)**) and treated with vehicle or amitriptyline (50  $\mu$ M) after siRNA-mediated *SMPD1* knockdown. sEV concentration was evaluated by AMNIS flow cytometry. Data are means  $\pm$  SD values. † $p \leq 0.05$  compared with corresponding I (n=4 independent samples/group; analyzed by two-way ANOVA followed by two-tailed paired t tests).



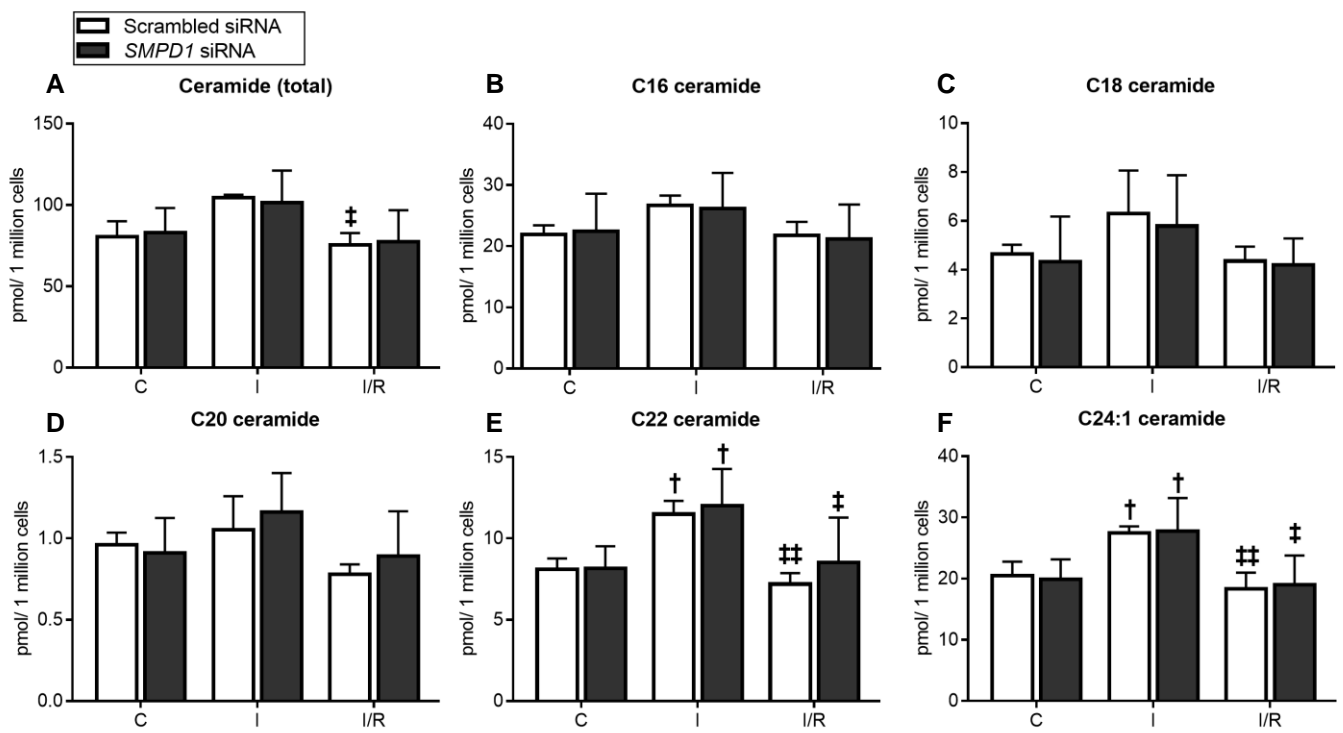

**Supplementary Figure 16. *SMPD1* knockdown does not change overall ceramide levels in cerebral microvascular endothelial cells *in vitro*.** (A) Total ceramide, (B) C16 ceramide, (C) C18 ceramide, (D) C20 ceramide, (E) C22 ceramide and (F) C24:1 ceramide content of hCMEC/D3 exposed to non-ischemic control condition (C), OGD (that is, ischemia; I) or ischemia followed by reoxygenation/glucose re-supplementation (I/R), which were transfected with scrambled siRNA (used as control) or *SMPD1* siRNA. Ceramide levels were measured by LC-MS/MS. Data are means  $\pm$  SD values. <sup>†</sup> $p \leq 0.05$  compared with corresponding C; <sup>‡</sup> $p \leq 0.05$ /<sup>##</sup> $p \leq 0.001$  compared with corresponding I (n=3 independent samples/ group [in (A-F)]); analyzed by two-way ANOVA followed by LSD tests).

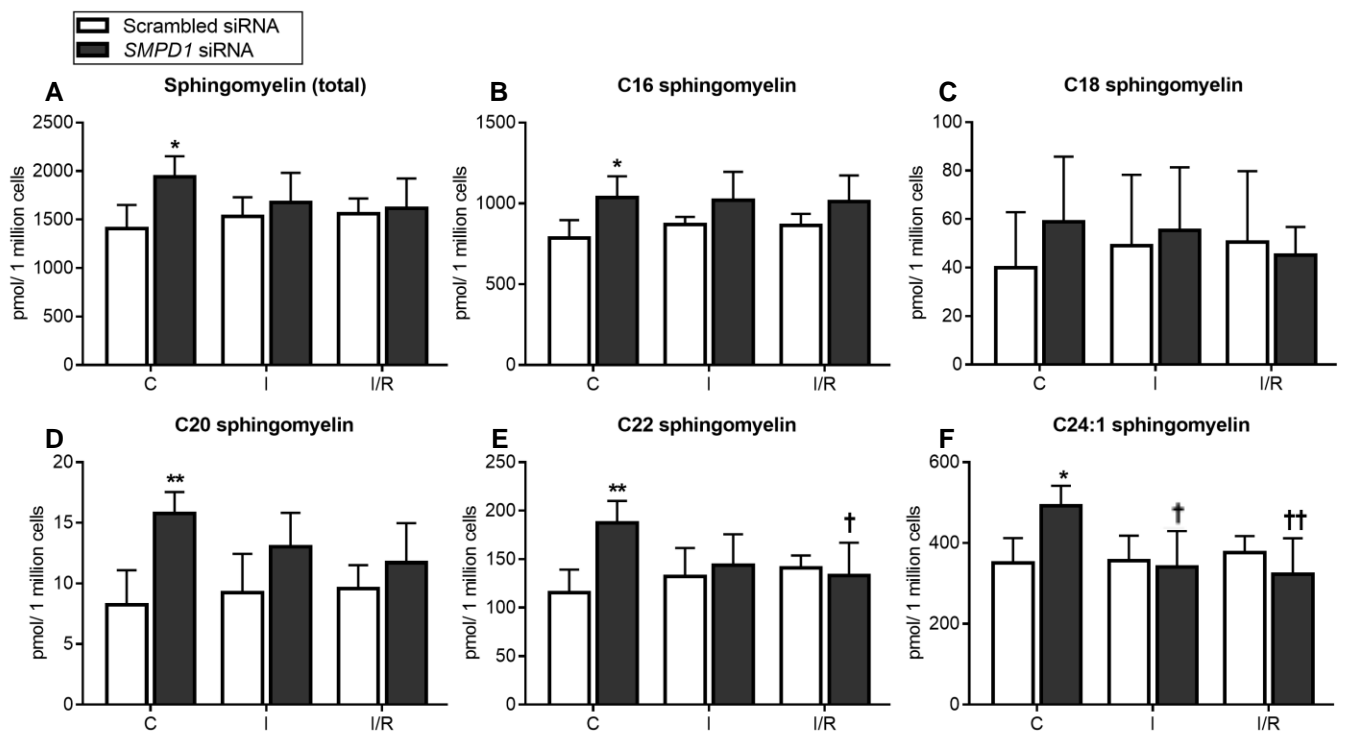

**Supplementary Figure 17. *SMPD1* knockdown increases sphingomyelin levels in cerebral microvascular endothelial cells *in vitro*.** (A) Total sphingomyelin, (B) C16 sphingomyelin, (C) C18 sphingomyelin, (D) C20 sphingomyelin, (E) C22 sphingomyelin and (F) C24:1 sphingomyelin content of hCMEC/D3 exposed to non-ischemic control condition (C), OGD (that is, ischemia; I) or ischemia followed by reoxygenation/glucose re-supplementation (I/R), which were transfected with scrambled siRNA (used as control) or *SMPD1* siRNA. Sphingomyelin levels were measured by LC-MS/MS. Data are means  $\pm$  SD values. \* $p \leq 0.05$ /\*\* $p \leq 0.01$  compared with corresponding scrambled siRNA; † $p \leq 0.05$ /†† $p \leq 0.01$  compared with corresponding C (n=3 independent samples/ group [in (A-F)]); analyzed by two-way ANOVA followed by LSD tests).

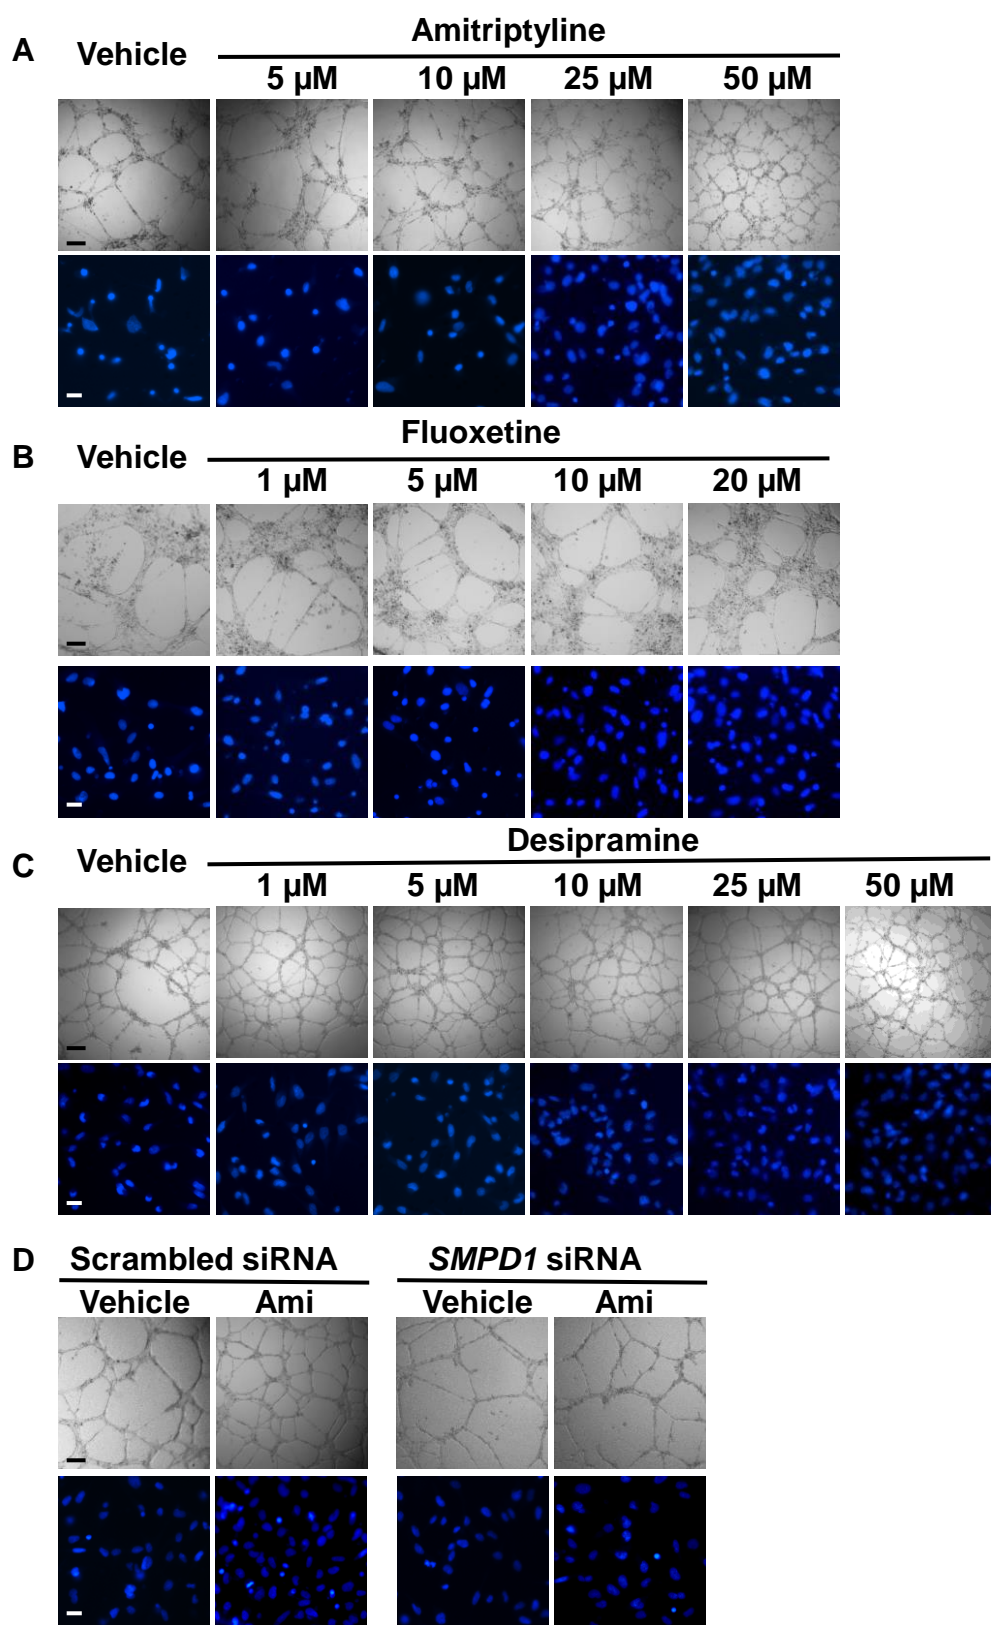

**Supplementary Figure 18. Amitriptyline, fluoxetine and desipramine promote cerebral angiogenesis *in vitro* in an ASM dependent way.** Representative examples of matrigel-based tube formation and migration assays of hCMEC/D3 treated with vehicle, **(A)** amitriptyline (0-50  $\mu\text{M}$ ), **(B)** fluoxetine (0-20  $\mu\text{M}$ ) or **(C)** desipramine (0-50  $\mu\text{M}$ ) or of **(D)** hCMEC/D3 transfected with scrambled siRNA or *SMPD1* siRNA which were exposed to vehicle or amitriptyline (Ami, 50  $\mu\text{M}$ ). Scale bars in tube formation photographs, 200  $\mu\text{m}$ ; in transwell migration photographs, 20  $\mu\text{m}$ .

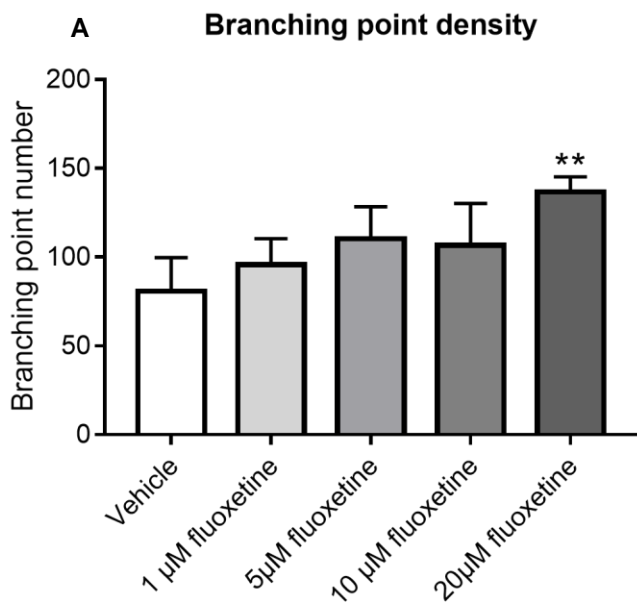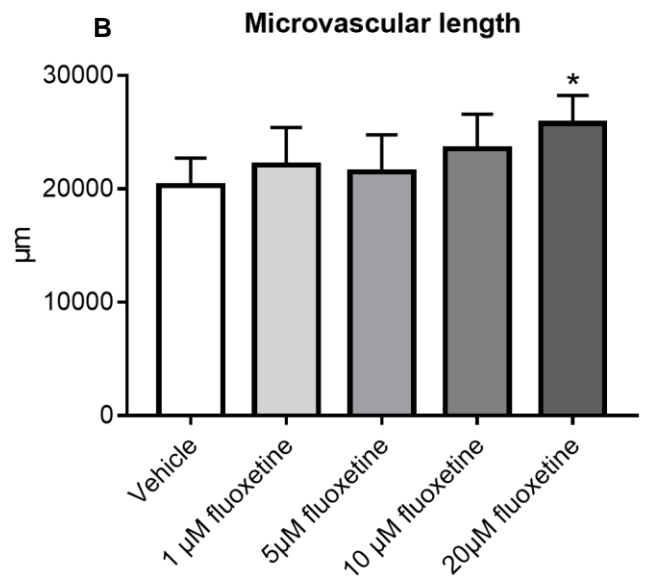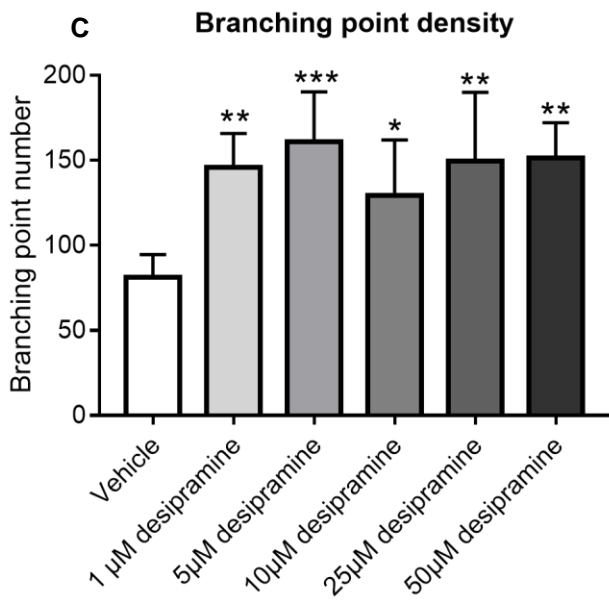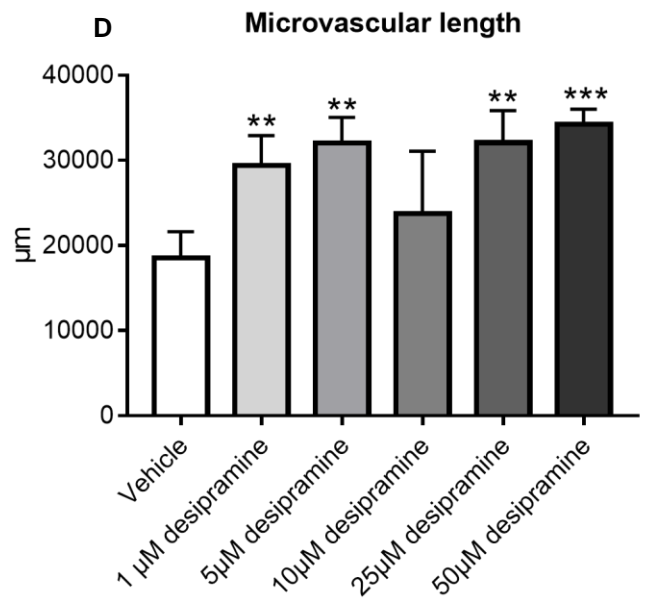

**Supplementary Figure 19. ASM inhibitors fluoxetine and desipramine promote cerebral angiogenesis *in vitro*.** (A, C) Branching point density and (B, D) microvascular length evaluated in the matrigel-based tube formation assay in hCMEC/D3 exposed to vehicle, fluoxetine (0-20  $\mu\text{M}$ ) or desipramine (0-50  $\mu\text{M}$ ). Data are means  $\pm$  SD values. \* $p \leq 0.05$ /\*\* $p \leq 0.01$ /\*\*\* $p \leq 0.001$  compared with corresponding vehicle (n=3-4 independent samples/ group; analyzed by one-way ANOVA followed by LSD tests).

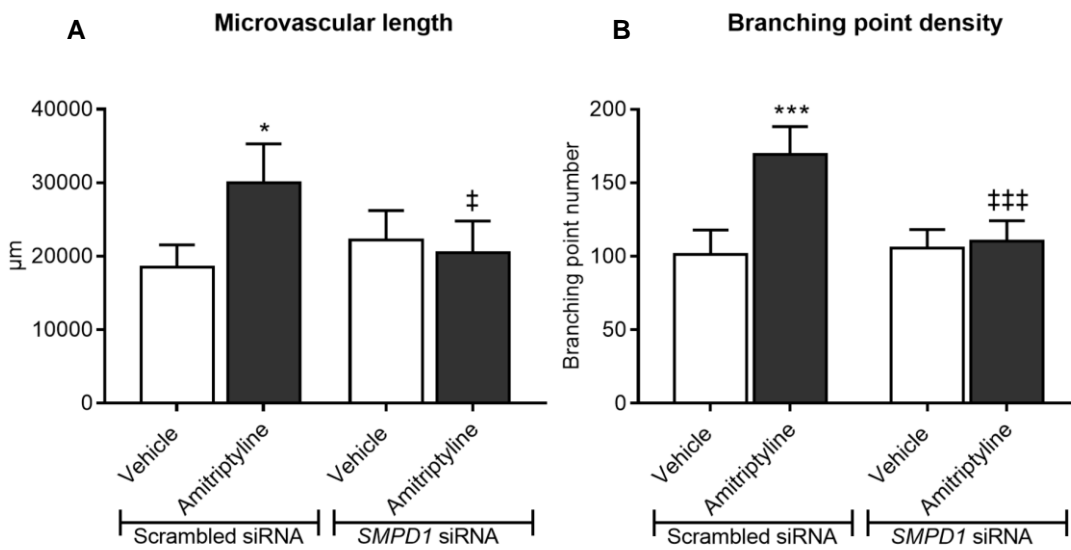

**Supplementary Figure 20. Amitriptyline promotes cerebral angiogenesis *in vitro* in an ASM dependent way. (A) Microvascular length and (B) branching point density evaluated in the matrigel-based tube formation assay of non-ischemic hCMEC/D3 transfected with scrambled siRNA (used as control) or *SMPD1* siRNA which were exposed to vehicle or amitriptyline (50 μM). Representative photographs for tube formation assays are shown in Figure 4. Data are means ± SD values. \* $p \leq 0.05$ /\*\* $p \leq 0.001$  compared with corresponding vehicle; ‡ $p \leq 0.05$ /### $p \leq 0.001$  compared with corresponding scrambled siRNA (n=5-8 independent samples/group; analyzed by two-way ANOVA followed by LSD tests).**

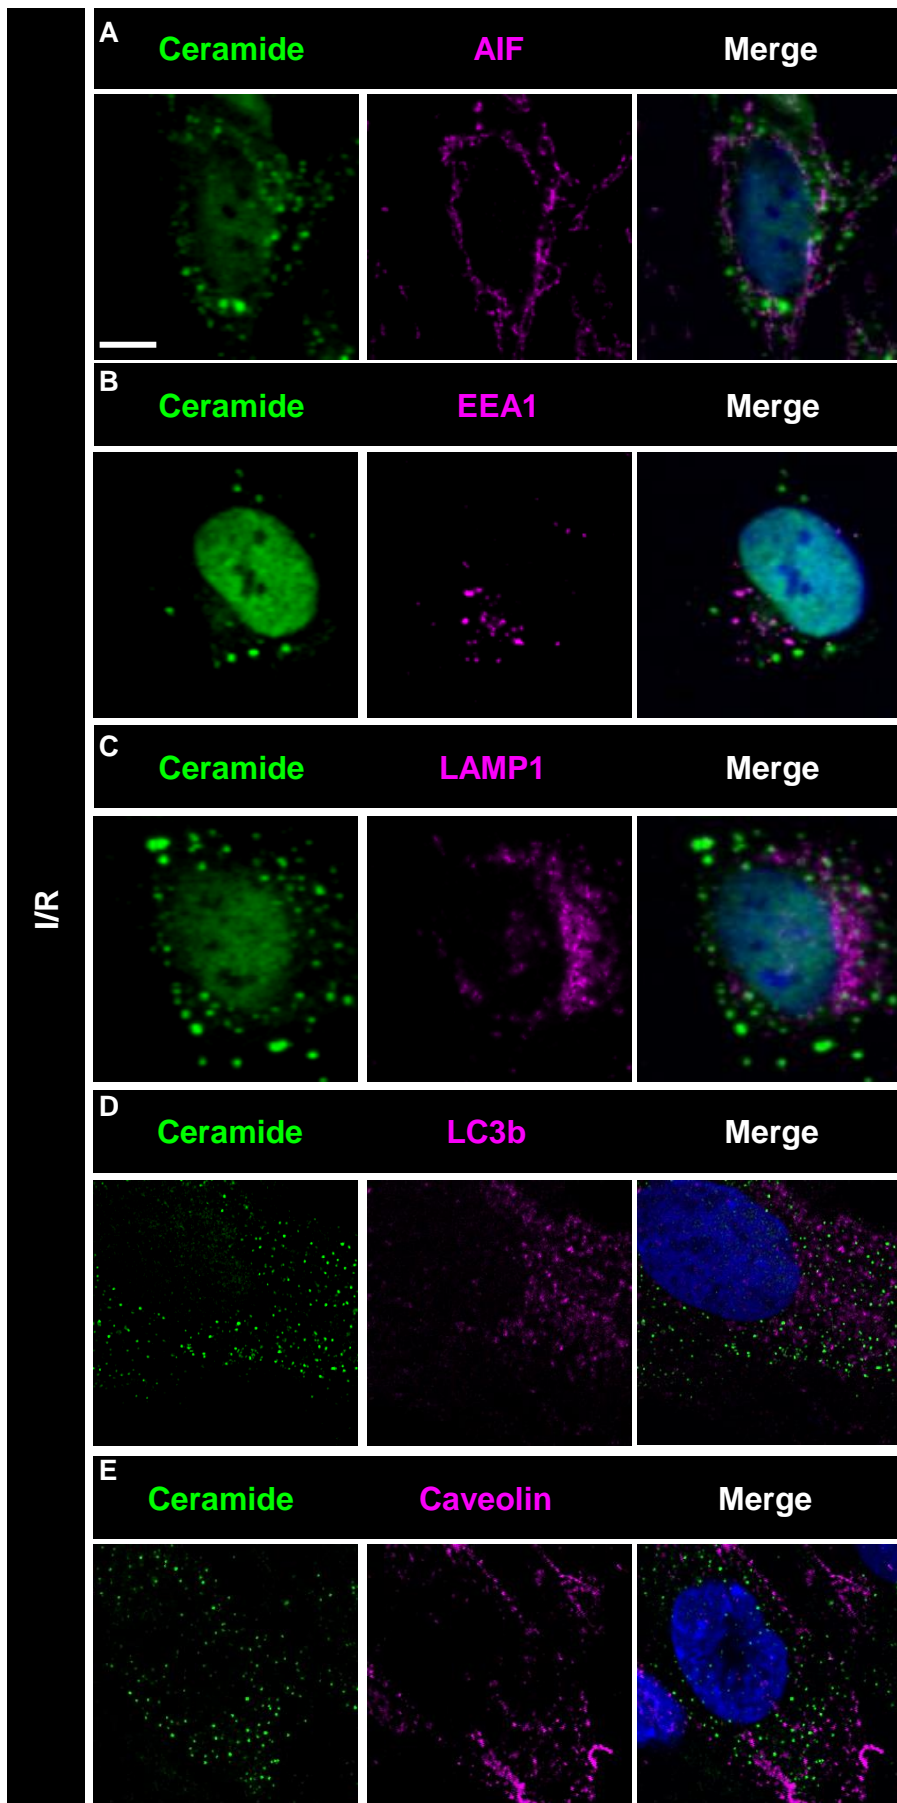

**Supplementary Figure 21. Intracellular ceramide-rich vesicles do not express mitochondrial, early endosome, lysosome, autophagosome and caveolae markers.** Immunocytochemistry for ceramide (in green) and **(A)** the mitochondrial marker apoptosis-inducing factor (AIF), **(B)** the early endosome marker early endosome antigen-1 (EEA1), **(C)** the lysosome marker lysosomal-associated membrane protein-1 (LAMP1), **(D)** the autophagosome marker microtubule-associated protein light chain-3b (LC3b) and **(E)** the caveolae marker caveolin (all in magenta) of hCMEC/D3 exposed to 24 hours OGD (that is, ischemia) followed by 3 hours reoxygenation/glucose re-supplementation (I/R). In the merged photomicrographs, no double labeled cells are visible. Nuclei were counterstained with Hoechst 33342 (in blue). Scale bar, 5  $\mu$ m. Shown are representative results from 4 independent studies.



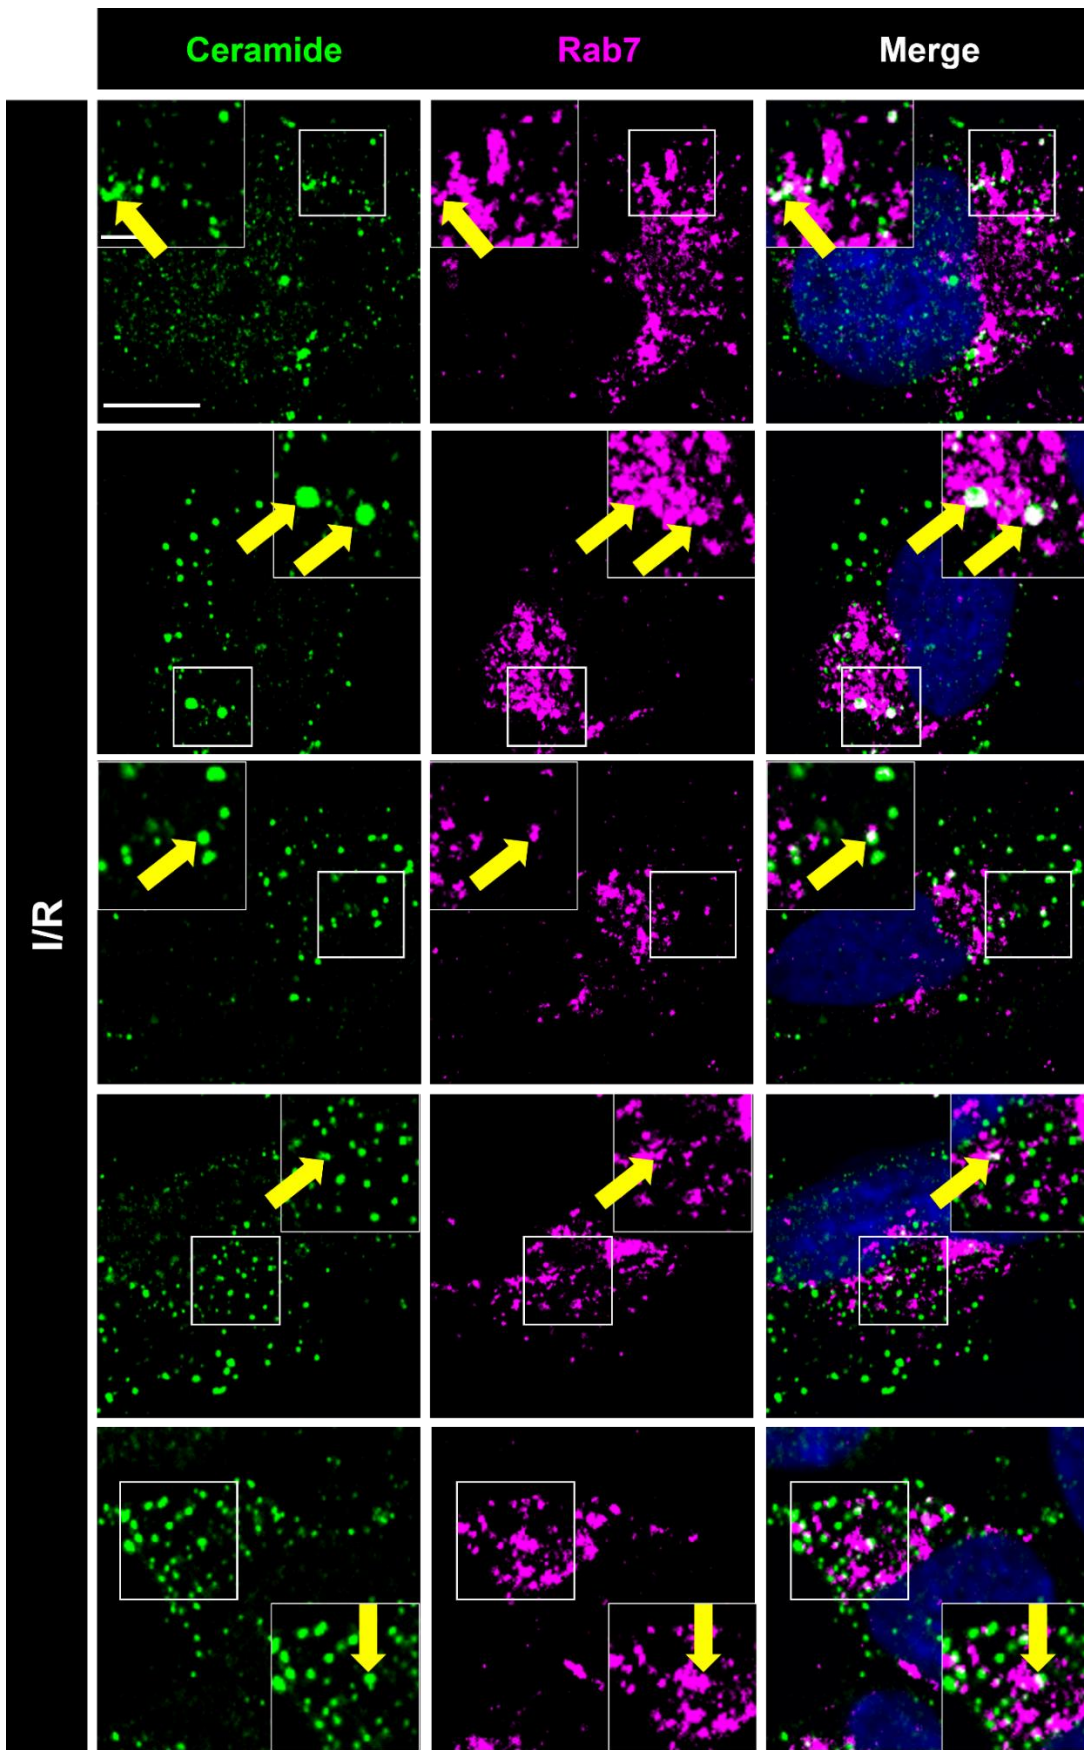

**Supplementary Figure 22. Intracellular ceramide-rich vesicles co-localize with late endosome marker Rab7.** Immunohistochemistry for ceramide (in green) and the late endosome marker Rab7 (in magenta) in hCMEC/D3 exposed to 24 hours ischemia followed by 3 hours reoxygenation/glucose re-supplementation (I/R). In the merged photographs, double labeled cells are shown in white (selected cells labeled with arrow; nuclei were counterstained in blue with Hoechst 33342). Scale bar in overview photograph, 10  $\mu\text{m}$ ; in magnification, 5  $\mu\text{m}$ .

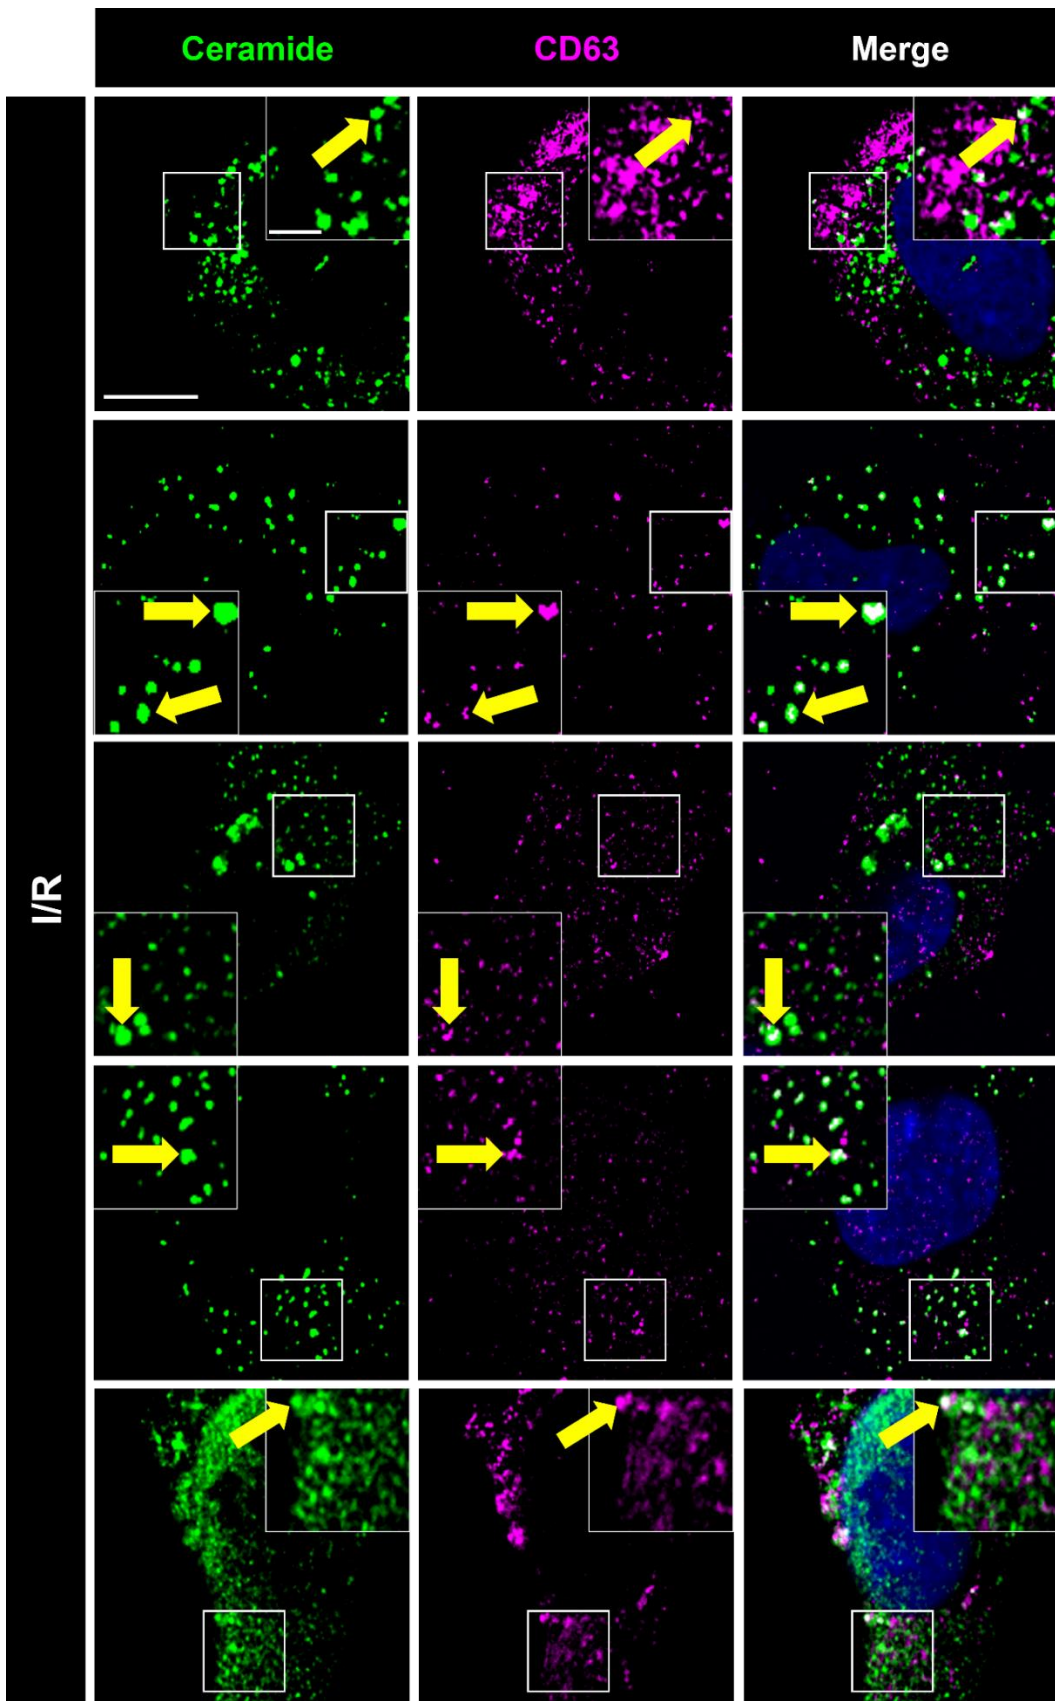

**Supplementary Figure 23. Intracellular ceramide-rich vesicles co-localize with MVB marker CD63.** Immunohistochemistry for ceramide (in green) and the multivesicular body (MVB) marker CD63 (in magenta) of hCMEC/D3 exposed to 24 hours ischemia followed by 3 hours reoxygenation/glucose re-supplementation (I/R). In the merged photographs, double labeled cells are shown in white (selected cells labeled with arrow; nuclei were counterstained in blue with Hoechst 33342). Scale bar in overview photograph, 10  $\mu\text{m}$ ; in magnification, 5  $\mu\text{m}$ .



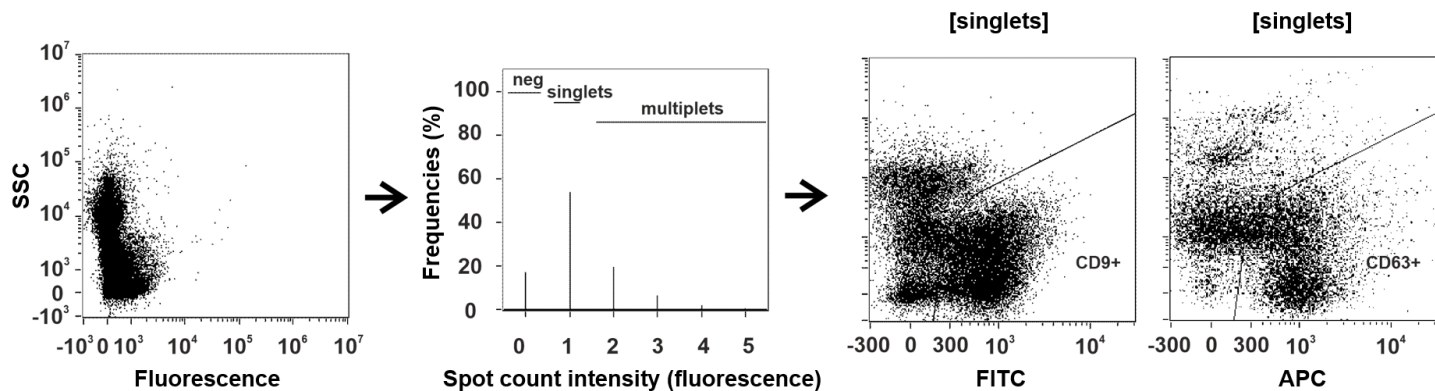

**Supplementary Figure 24. Gating strategy for evaluating sEVs by ImageStreamX flow cytometry.** From all recorded signals (1<sup>st</sup> plot from left), signals not showing spot count signal or signal multiplets were excluded (2<sup>nd</sup> plot from left). In the two representative plots on the right, side scatter (SSC) intensities of single objects are plotted against the fluorescence intensities of CD9<sup>+</sup> (labeled with FITC) or CD63<sup>+</sup> (labeled with APC) objects. Shown are representative results under control conditions from 4-9 independent studies.

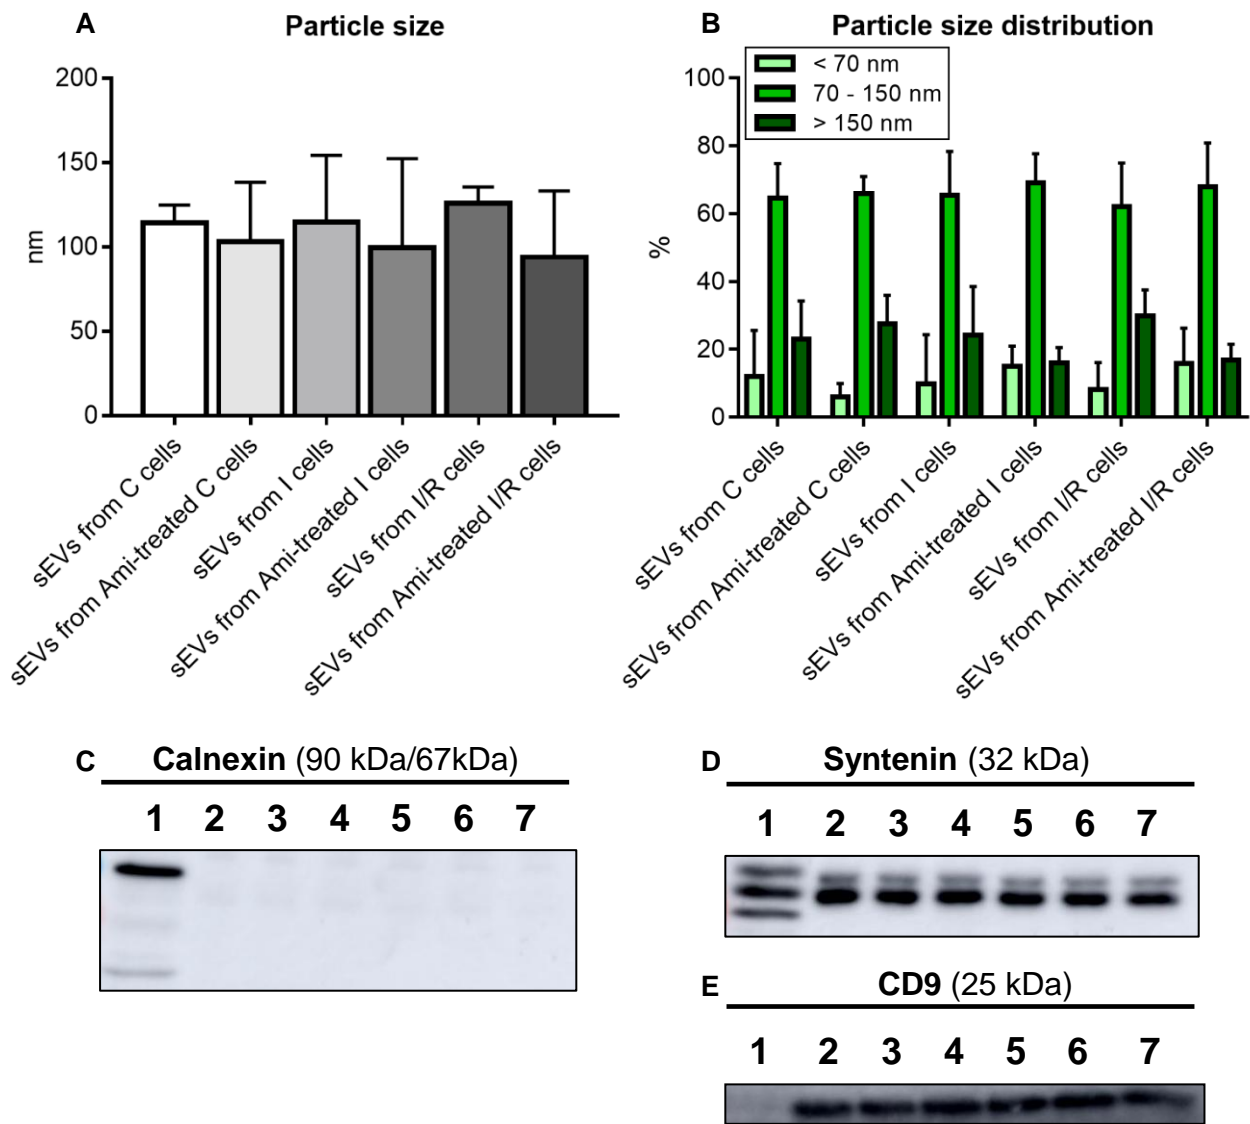

**Supplementary Figure 25. sEVs released from cerebral microvascular endothelial cells have the physicochemical properties and protein expression characteristics of exosomes.** (A) Particle size and (B) particle size distribution (<70 nm, 70 – 150 nm and >150 nm) evaluated by nanoparticle tracking analysis (NTA) of sEVs obtained from supernatants of hCMEC/D3 exposed to non-ischemic control condition (C), OGD (that is, ischemia; I) or ischemia followed by reoxygenation/glucose re-supplementation (I/R) which were treated with vehicle or amitriptyline (Ami, 50  $\mu$ M). Western blots for the (C) the cellular contamination marker calnexin, and (D, E) the exosomal markers syntenin and CD9 using protein samples obtained from (1) hCMEC/D3 lysates, (2) sEVs from vehicle-treated non-ischemic control hCMEC/D3, (3) sEVs from amitriptyline-treated control hCMEC/D3, (4) sEVs from vehicle-treated ischemic hCMEC/D3, (5) sEVs from amitriptyline-treated ischemic hCMEC/D3, (6) sEVs from vehicle-treated I/R hCMEC/D3 and (7) sEVs from amitriptyline-treated I/R hCMEC/D3. Note the presence of 32 kDa syntenin and 25 kDa CD9, but absence of 90 kDa/67 kDa calnexin in sEVs samples. Data are means  $\pm$  SD values. No significant differences were noted between groups (n=3 independent samples/group; analyzed by one-way ANOVA).

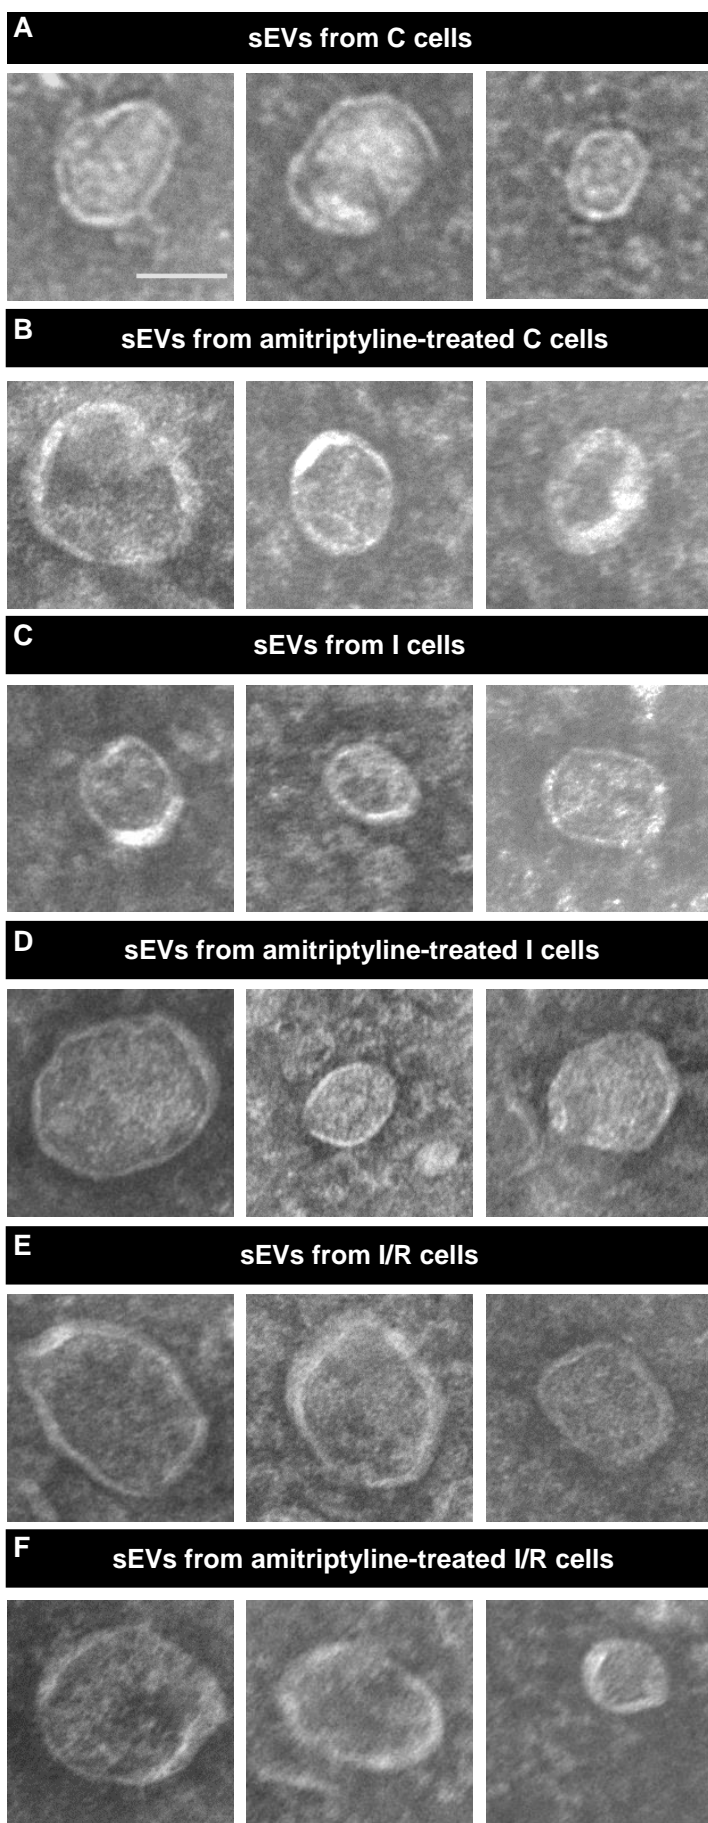

**Supplementary Figure 26. sEVs released from cerebral microvascular endothelial cells have the electron microscopic size and appearance of exosomes.** Transmission electron microscopy showing representative sEVs obtained from supernatants of hCMEC/D3 exposed to non-ischemic control condition (C), OGD (that is, ischemia; I) or ischemia followed by reoxygenation/glucose re-supplementation (I/R), which had been treated with vehicle or amitriptyline (50  $\mu$ M), while cells were cultured. The typical cup shape double contrast is suggestive for a double-layered membrane structure that is found in sEVs. Scale bar, 100 nm.

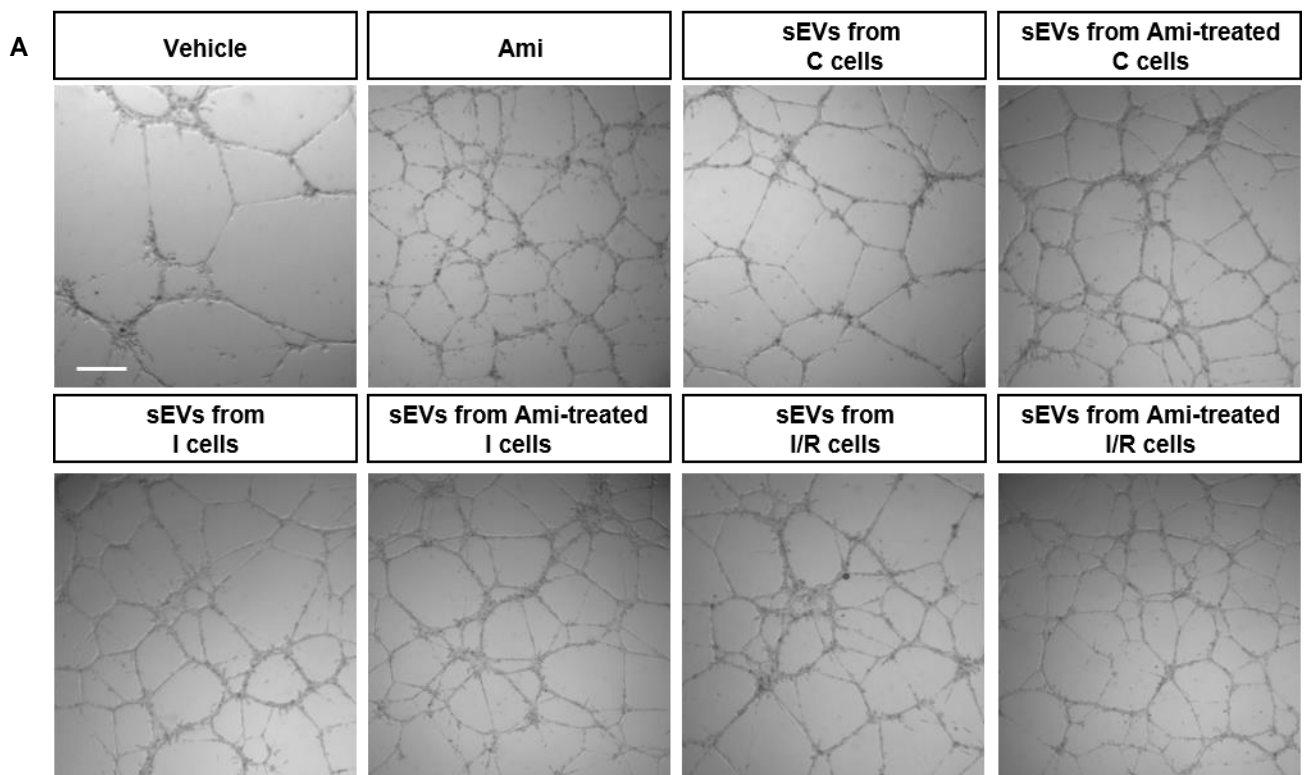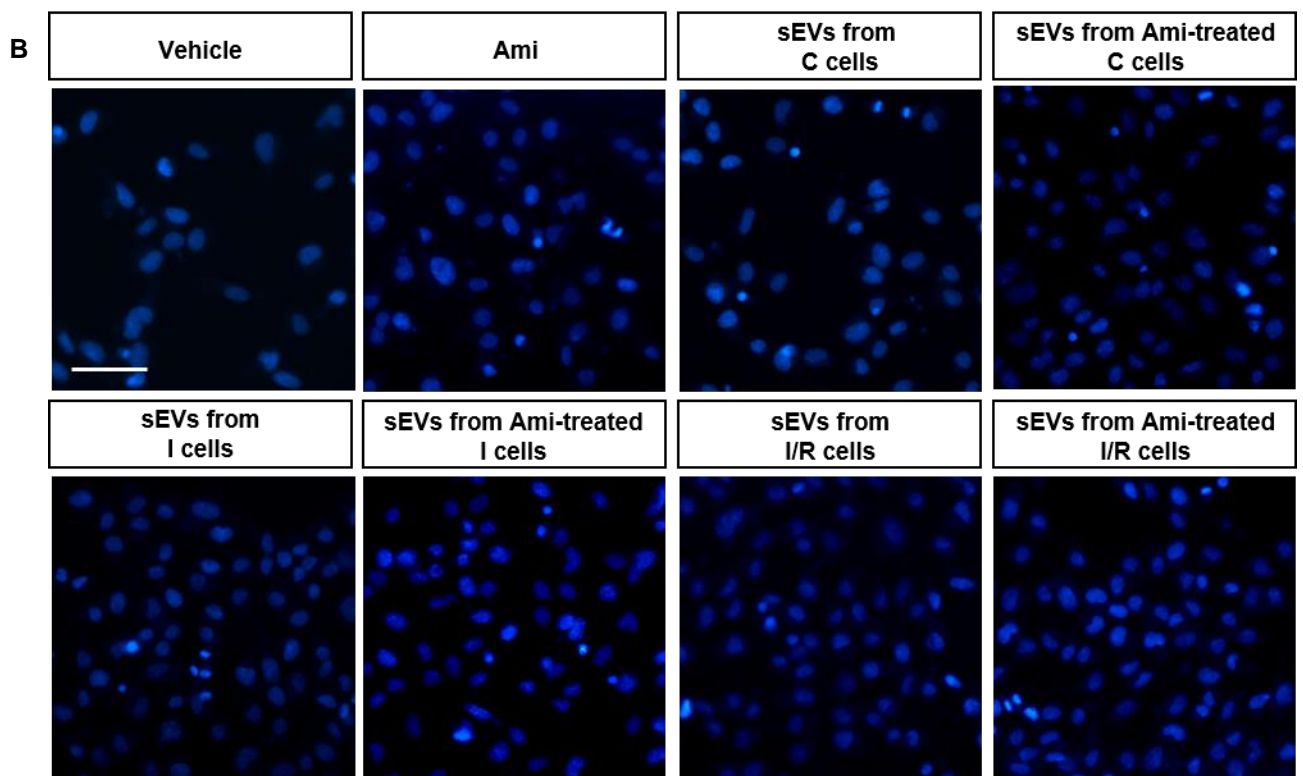

**Supplementary Figure 27. sEVs obtained from supernatants of cerebral microvascular endothelial cells exposed to ASM inhibitor amitriptyline have angiogenic activity that resembles sEVs released by endothelial cells during I/R.** Representative photographs of **(A)** matrigel-based tube formation and **(B)** transwell migration assays of hCMEC/D3, which were treated with vehicle, amitriptyline (Ami, 50  $\mu$ M) or sEVs (25  $\mu$ g protein/ ml) isolated from the supernatants of hCMEC/D3 that had been cultured in non-ischemic control condition (C), OGD (that is, ischemia; I) or ischemia followed by reoxygenation/glucose re-supplementation (I/R) and had been treated with vehicle or amitriptyline (50  $\mu$ M) while supernatants were collected. A quantitative analysis is shown in **Figure 7**. Scale bar in **(A)**, 200  $\mu$ m; in **(B)**, 20  $\mu$ m.

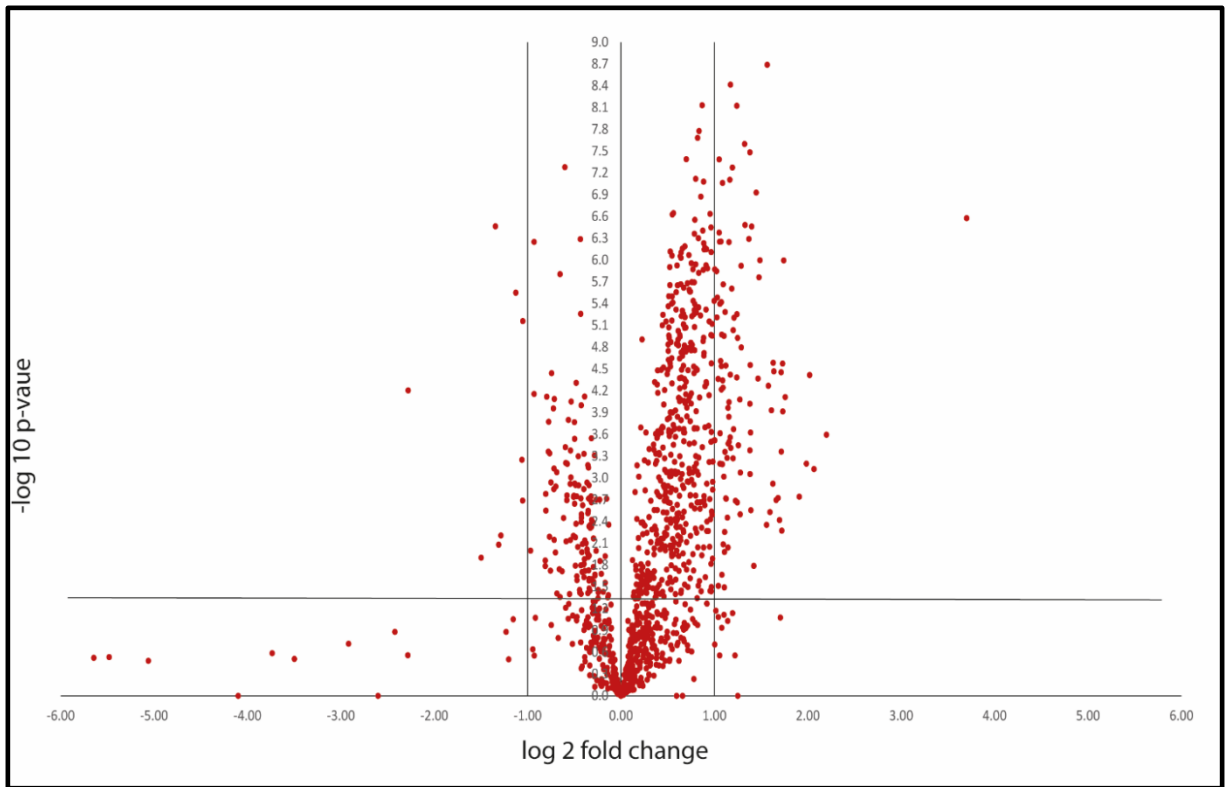

**Supplementary Figure 28. Volcano plot showing differentially regulated proteins in sEVs released from hCMEC/D3 cultured under non-ischemic control conditions that had been exposed to vehicle or amitriptyline (50  $\mu$ M).** Proteins were evaluated by LC-MS-based proteomics. Proteins with statistically significant differential regulation ( $\geq 2$ -fold, p value  $\leq 0.05$ ; analyzed by two-tailed t tests) are located in the top left and right sectors (n=6 independent samples/group).
