# Supplementary material for: Acid sphingomyelinase deactivation post-ischemia promotes brain angiogenesis and remodeling by small extracellular vesicles
Source: PubMed Central journal article supplement (PMC9424180; doi:10.1007/s00395-022-00950-7), 2022-08-29
Supplement: 395_2022_950_MOESM2_ESM.pdf [file 395_2022_950_MOESM2_ESM.pdf]

# SUPPLEMENTARY TABLES

## Acid sphingomyelinase deactivation post-ischemia promotes brain angiogenesis and remodeling by small extracellular vesicles

### Basic Research in Cardiology

Ayan Mohamud Yusuf,<sup>1,2</sup> Nina Hagemann,<sup>1,2</sup> Xiaoni Zhang,<sup>1,2</sup> Maria Zafar,<sup>1,2</sup> Tanja Hussner,<sup>1,2</sup> Carolin Bromkamp,<sup>1,2</sup> Carlotta Martiny,<sup>1,2</sup> Tobias Tertel,<sup>3</sup> Verena Börger,<sup>3</sup> Fabian Schumacher,<sup>4,5,6</sup> Fiorella A. Solari,<sup>7</sup> Mike Hasenberg,<sup>8</sup> Christoph Kleinschnitz,<sup>1,2</sup> Thorsten R. Doeppner,<sup>1,2,9</sup> Burkhard Kleuser,<sup>5</sup> Albert Sickmann,<sup>7,10,11</sup> Matthias Gunzer,<sup>7,8</sup> Bernd Giebel,<sup>3</sup> Richard Kolesnick,<sup>12</sup> Erich Gulbins,<sup>4</sup> Dirk M. Hermann<sup>1,2\*</sup>

<sup>1</sup>Department of Neurology, <sup>2</sup>Center for Translational and Behavioral Neurosciences, <sup>3</sup>Institute of Transfusion Medicine and <sup>4</sup>Institute of Molecular Biology, University Hospital Essen, Essen, Germany, <sup>5</sup>Department of Toxicology, University of Potsdam, Nuthetal, Germany, <sup>6</sup>Institute of Pharmacy, Freie Universität Berlin, Berlin, Germany, <sup>7</sup>Leibniz-Institut für Analytische Wissenschaften-ISAS-e.V., Dortmund, Germany, <sup>8</sup>Institute of Immunology and Experimental Imaging, University Hospital Essen, Essen, Germany, <sup>9</sup>Department of Neurology, University Medicine Göttingen, Göttingen, Germany, <sup>10</sup>Medizinisches Proteom-Center (MPC), Ruhr University, Bochum, Germany, <sup>11</sup>Department of Chemistry, College of Physical Sciences, University of Aberdeen, Aberdeen, Scotland, U.K., <sup>12</sup>Memorial Sloan Kettering Cancer Center, New York, New York, U.S.A.; \*corresponding author.

Correspondence: Prof. Dirk M. Hermann, MD, Department of Neurology, University Hospital Essen, Hufelandstr. 55, D-45122 Essen, Germany, E-Mail: dirk.hermann@uk-essen.de

# Supplementary Table 1. Proteins significantly upregulated in sEVs released by hCMEC/D3 exposed to amitriptyline.

## Association according to KEGG pathway database:

|                                     |
|-------------------------------------|
| Phagosome                           |
| Lysosome                            |
| Protein export                      |
| Antigen processing and presentation |
| Epstein-Barr virus infection        |
| Viral myocarditis                   |

| Accession | Description                                                           | Protein name | Log <sub>2</sub> fold change | P-value |
|-----------|-----------------------------------------------------------------------|--------------|------------------------------|---------|
| Q8NE71    | ATP-binding cassette sub-family F member 1                            | ABCF1        | 1.12                         | 0.00    |
| P11310    | Medium-chain specific acyl-CoA dehydrogenase, mitochondrial           | ACADM        | 1.73                         | 0.00    |
| Q13443    | Disintegrin and metalloproteinase domain-containing protein 9         | ADAM9        | 1.38                         | 0.00    |
| Q13155    | Aminoacyl tRNA synthase complex-interacting multifunctional protein 2 | AIMP2        | 1.09                         | 0.00    |
| Q13740    | CD166 antigen                                                         | ALCAM        | 1.20                         | 0.00    |
| P09972    | Fructose-bisphosphate aldolase C                                      | ALDOC        | 1.04                         | 0.03    |
| P15144    | Aminopeptidase N                                                      | AN           | 1.10                         | 0.00    |
| Q9BX55    | AP-1 complex subunit mu-1                                             | AP1M1        | 1.06                         | 0.00    |
| Q92572    | AP-3 complex subunit sigma-1                                          | AP3S1        | 1.14                         | 0.00    |
| P05026    | Sodium/potassium-transporting ATPase subunit beta-1                   | ATP1B1       | 1.00                         | 0.00    |
| P61769    | Beta-2-microglobulin                                                  | B2M          | 1.21                         | 0.00    |
| Q05682    | Caldesmon                                                             | CALD1        | 1.14                         | 0.00    |
| P27824    | Calnexin                                                              | CANX         | 1.28                         | 0.00    |
| Q6NZ12    | Caveolae-associated protein 1                                         | CAVIN1       | 1.63                         | 0.00    |
| P45973    | Chromobox protein homolog 5                                           | CBX5         | 1.33                         | 0.00    |
| P16070    | CD44 antigen                                                          | CD44         | 1.09                         | 0.00    |
| P15529    | Membrane cofactor protein                                             | CD46         | 1.28                         | 0.00    |
| P08174    | Complement decay-accelerating factor                                  | CD55         | 1.38                         | 0.00    |
| P48960    | CD97 antigen                                                          | CD97         | 1.17                         | 0.00    |
| Q14008    | Cytoskeleton-associated protein 5                                     | CKAP5        | 1.11                         | 0.00    |
| Q6UVK1    | Chondroitin sulfate proteoglycan 4                                    | CSPG4        | 1.40                         | 0.00    |
| P07858    | Cathepsin B                                                           | CTSB         | 1.06                         | 0.00    |
| P07339    | Cathepsin D                                                           | CTSD         | 1.07                         | 0.00    |
| Q14247    | Src substrate cortactin                                               | CTTN         | 1.42                         | 0.02    |
| P17844    | Probable ATP-dependent RNA helicase DDX5                              | DDX5         | 1.03                         | 0.00    |
| P31689    | DnaJ homolog subfamily A member 1                                     | DNAJA1       | 1.09                         | 0.00    |
| P23919    | Thymidylate kinase                                                    | DTYMK        | 1.56                         | 0.00    |
| Q9BY44    | Eukaryotic translation initiation factor 2A                           | EIF2A        | 1.23                         | 0.00    |
| P19525    | Interferon-induced, double-stranded RNA-activated protein kinase      | EIF2AK2      | 1.74                         | 0.00    |
| O75821    | Eukaryotic translation initiation factor 3 subunit G                  | EIF3G        | 1.11                         | 0.01    |
| Q7L2H7    | Eukaryotic translation initiation factor 3 subunit M                  | EIF3M        | 1.66                         | 0.00    |
| Q04637    | Eukaryotic translation initiation factor 4 gamma 1                    | EIF4G1       | 1.05                         | 0.00    |
| P13804    | Electron transfer flavoprotein subunit alpha, mitochondrial           | ETFA         | 1.16                         | 0.00    |
| Q96A65    | Exocyst complex component 4                                           | EXOC4        | 2.02                         | 0.00    |
| Q13451    | Peptidyl-prolyl cis-trans isomerase FKBP5                             | FKBP5        | 1.09                         | 0.00    |
| P35637    | RNA-binding protein FUS                                               | FUS          | 1.47                         | 0.00    |
| P51114    | Fragile X mental retardation syndrome-related protein 1               | FXR1         | 1.08                         | 0.00    |
| P60520    | Gamma-aminobutyric acid receptor-associated protein-like 2            | GABARAPL2    | 1.58                         | 0.00    |
| Q96RP9    | Elongation factor G, mitochondrial                                    | GFM1         | 1.06                         | 0.00    |
| P16278    | Beta-galactosidase                                                    | GLB1         | 1.68                         | 0.00    |
| Q14344    | Guanine nucleotide-binding protein subunit alpha-13                   | GNA13        | 2.20                         | 0.00    |
| P08236    | Beta-glucuronidase                                                    | GUSB         | 1.98                         | 0.00    |
| P19367    | Hexokinase-1                                                          | HK1          | 1.64                         | 0.00    |
| P01889    | HLA class I histocompatibility antigen, B alpha chain                 | HLA-B        | 1.24                         | 0.00    |
| P10321    | HLA class I histocompatibility antigen, C alpha chain                 | HLA-C        | 1.25                         | 0.00    |
| P51991    | Heterogeneous nuclear ribonucleoprotein A3                            | HNRNPA3      | 1.63                         | 0.00    |
| P31943    | Heterogeneous nuclear ribonucleoprotein H                             | HNRNPH1      | 1.08                         | 0.00    |
| P14866    | Heterogeneous nuclear ribonucleoprotein L                             | HNRNPL       | 1.00                         | 0.00    |
| Q00839    | Heterogeneous nuclear ribonucleoprotein U                             | HNRNPU       | 1.07                         | 0.00    |
| Q16666    | Gamma-interferon-inducible protein 16                                 | IFI16        | 1.38                         | 0.00    |
| Q9Y6M1    | Insulin-like growth factor 2 mRNA-binding protein 2                   | IGF2BP2      | 1.29                         | 0.00    |
| P08648    | Integrin alpha-5                                                      | ITGA5        | 1.38                         | 0.00    |
| P33176    | Kinesin-1 heavy chain                                                 | KIF5B        | 1.19                         | 0.00    |
| P52292    | Importin subunit alpha-1                                              | KPNA2        | 1.39                         | 0.00    |
| P11279    | Lysosome-associated membrane glycoprotein 1                           | LAMP1        | 1.24                         | 0.00    |
| Q9UHB6    | LIM domain and actin-binding protein 1                                | LIMA1        | 1.38                         | 0.00    |
| Q8N1G4    | Leucine-rich repeat-containing protein 47                             | LRRC47       | 1.11                         | 0.01    |
| P27816    | Microtubule-associated protein 4                                      | MAP4         | 1.32                         | 0.00    |
| P43243    | Matrin-3                                                              | MATR3        | 1.73                         | 0.00    |
| P43121    | Cell surface glycoprotein MUC18                                       | MCAM         | 1.20                         | 0.00    |
| Q14566    | DNA replication licensing factor MCM6                                 | MCM6         | 1.26                         | 0.00    |
| Q95297    | Myelin protein zero-like protein 1                                    | MPZL1        | 1.15                         | 0.00    |
| P42285    | Exosome RNA helicase MTR4                                             | MTRX         | 1.61                         | 0.00    |
| P20591    | Interferon-induced GTP-binding protein Mx1                            | MX1          | 1.37                         | 0.00    |
| Q92542    | Nicestrin                                                             | NCSTN        | 1.72                         | 0.00    |
| P09874    | Poly [ADP-ribose] polymerase 1                                        | PARP1        | 1.06                         | 0.00    |

Comparison of n=6 different samples/group obtained from 10 independent cell cultures.

## Supplementary Table 1. Proteins significantly upregulated in sEVs released by hCMEC/D3 exposed to amitriptyline.

| Association according to KEGG pathway database: |                                     |
|-------------------------------------------------|-------------------------------------|
|                                                 | Phagosome                           |
|                                                 | Lysosome                            |
|                                                 | Protein export                      |
|                                                 | Antigen processing and presentation |
|                                                 | Epstein-Barr virus infection        |
|                                                 | Viral myocarditis                   |

| Accession | Description                                                                                   | Protein name | Log 2 fold change | P-value |
|-----------|-----------------------------------------------------------------------------------------------|--------------|-------------------|---------|
| O60664    | Perilipin-3                                                                                   | PLIN3        | 1.04              | 0.00    |
| P30876    | DNA-directed RNA polymerase II subunit RPB2                                                   | POLR2B       | 1.15              | 0.00    |
| Q06830    | Peroxisome oxidoreductin-1                                                                    | PRDX1        | 1.05              | 0.00    |
| O75475    | PC4 and SFRS1-interacting protein                                                             | PSIP1        | 1.57              | 0.00    |
| P28066    | Proteasome subunit alpha type-5                                                               | PSMA5        | 1.70              | 0.00    |
| Q06323    | Proteasome activator complex subunit 1                                                        | PSME1        | 1.39              | 0.00    |
| Q9UKM9    | RNA-binding protein Raly                                                                      | RALY         | 1.06              | 0.00    |
| Q14498    | RNA-binding protein 39                                                                        | RBM39        | 1.27              | 0.00    |
| Q04206    | Transcription factor p65                                                                      | RELA         | 1.18              | 0.00    |
| P13489    | Ribonuclease inhibitor                                                                        | RNH1         | 1.17              | 0.00    |
| P27635    | 60S ribosomal protein L10                                                                     | RPL10        | 1.00              | 0.00    |
| P35268    | 60S ribosomal protein L22                                                                     | RPL22        | 1.17              | 0.00    |
| P36578    | 60S ribosomal protein L4                                                                      | RPL4         | 1.11              | 0.00    |
| P62841    | 40S ribosomal protein S15                                                                     | RPS15        | 1.72              | 0.01    |
| Q9P2E9    | Ribosome-binding protein 1                                                                    | RRBP1        | 1.10              | 0.00    |
| Q14108    | Lysosome membrane protein 2                                                                   | SCARB2       | 1.48              | 0.00    |
| P53985    | Monocarboxylate transporter 1                                                                 | SLC16A1      | 1.12              | 0.00    |
| Q9H2H9    | Sodium-coupled neutral amino acid transporter 1                                               | SLC38A1      | 1.21              | 0.00    |
| Q96QD8    | Sodium-coupled neutral amino acid transporter 2                                               | SLC38A2      | 1.07              | 0.00    |
| Q15043    | Zinc transporter ZIP14                                                                        | SLC39A14     | 1.13              | 0.00    |
| P08195    | 4F2 cell-surface antigen heavy chain                                                          | SLC3A2       | 1.45              | 0.00    |
| P30825    | High affinity cationic amino acid transporter 1                                               | SLC7A1       | 1.08              | 0.02    |
| Q01650    | Large neutral amino acids transporter small subunit 1                                         | SLC7A5       | 1.16              | 0.00    |
| O60264    | SWI/SNF-related matrix-associated actin-dependent regulator of chromatin subfamily A member 5 | SMARCA5      | 1.03              | 0.00    |
| Q8TAQ2    | SWI/SNF complex subunit SMARCC2                                                               | SMARCC2      | 1.16              | 0.00    |
| O95347    | Structural maintenance of chromosomes protein 2                                               | SMC2         | 1.76              | 0.00    |
| Q9UQE7    | Structural maintenance of chromosomes protein 3                                               | SMC3         | 1.91              | 0.00    |
| Q13501    | Sequestosome-1                                                                                | SQSTM1       | 3.70              | 0.00    |
| P61011    | Signal recognition particle 54 kDa protein                                                    | SRP54        | 1.15              | 0.00    |
| Q9UHB9    | Signal recognition particle subunit SRP68                                                     | SRP68        | 1.17              | 0.00    |
| O76094    | Signal recognition particle subunit SRP72                                                     | SRP72        | 1.09              | 0.00    |
| P05455    | Lupus La protein                                                                              | SSB          | 1.00              | 0.00    |
| O15400    | Syntaxin-7                                                                                    | STX7         | 1.15              | 0.01    |
| Q13428    | Treacle protein                                                                               | TCOF1        | 1.49              | 0.00    |
| Q9Y5L0    | Transportin-3                                                                                 | TNPO3        | 1.60              | 0.00    |
| P06753    | Tropomyosin alpha-3 chain                                                                     | TPM3         | 1.09              | 0.01    |
| Q13263    | Transcription intermediary factor 1-beta                                                      | TRIM28       | 1.29              | 0.00    |
| P49411    | Elongation factor Tu, mitochondrial                                                           | TUFM         | 1.02              | 0.00    |
| P26368    | Splicing factor U2AF 65 kDa subunit                                                           | U2AF2        | 1.72              | 0.00    |
| O94874    | E3 UFM1-protein ligase 1                                                                      | UFL1         | 1.08              | 0.00    |
| Q16739    | Ceramide glucosyltransferase                                                                  | UGCG         | 1.11              | 0.03    |
| Q08AM6    | Protein VAC14 homolog                                                                         | VAC14        | 1.24              | 0.00    |
| Q15836    | Vesicle-associated membrane protein 3                                                         | VAMP3        | 2.07              | 0.00    |
| P08670    | Vimentin                                                                                      | VIM          | 1.19              | 0.00    |
| O75436    | Vacuolar protein sorting-associated protein 26A                                               | VPS26A       | 1.25              | 0.00    |

Comparison of n=6 different samples/group obtained from 10 independent cell cultures.

**Supplementary Table 2. Proteins significantly downregulated in sEVs released by hCMEC/D3 exposed to amitriptyline.**

|                                                        |                                                                |
|--------------------------------------------------------|----------------------------------------------------------------|
| <b>Association according to KEGG pathway database:</b> |                                                                |
|                                                        | Extracellular matrix - receptor interaction and focal adhesion |

| Accession | Description                                  | Protein name | Log 2 fold change | P-value |
|-----------|----------------------------------------------|--------------|-------------------|---------|
| P24821    | Tenascin                                     | TNC          | -1.05             | 0.00    |
| P02647    | Apolipoprotein A-I                           | APOA1        | -1.05             | 0.00    |
| P08572    | Collagen alpha-2(IV) chain                   | COL4A2       | -1.06             | 0.00    |
| O00622    | CCN family member 1                          | CCN1         | -1.13             | 0.00    |
| Q96N76    | Urocanate hydratase                          | UROC1        | -1.29             | 0.01    |
| P58107    | Epiplakin                                    | EPPK1        | -1.31             | 0.01    |
| P02788    | Lactotransferrin                             | LTF          | -1.34             | 0.00    |
| O76074    | cGMP-specific 3',5'-cyclic phosphodiesterase | PDE5A        | -1.50             | 0.01    |
| P26022    | Pentraxin-related protein PTX3               | PTX3         | -2.28             | 0.00    |

Comparison of n=6 different samples/group obtained from 10 independent cell cultures.

### Supplementary Table 3. Differentially regulated protein networks identified by KEGG pathway database analysis.

| Term ID  | Term description                    | Observed gene count | Background gene count | Strength | False discovery rate | Matching proteins in the network                    |
|----------|-------------------------------------|---------------------|-----------------------|----------|----------------------|-----------------------------------------------------|
| hsa04145 | Phagosome                           | 7                   | 145                   | 0.93     | 0.0014               | VAMP3, CANX, ITGA5, LAMP1, STX7, HLA-C, HLA-B       |
| hsa04142 | Lysosome                            | 8                   | 123                   | 1.06     | 0.00013              | CTSD, SCARB2, GUSB, GLB1, AP3S1, LAMP1, CTSB, AP1M1 |
| hsa03060 | Protein export                      | 3                   | 23                    | 1.36     | 0.0123               | SRP68, SRP72, SRP54                                 |
| hsa04612 | Antigen processing and presentation | 6                   | 66                    | 1.2      | 0.00027              | CANX, CTSB, HLA-C, PSME1, HLA-B, B2M                |
| hsa05169 | Epstein-Barr virus infection        | 7                   | 194                   | 0.8      | 0.0061               | EIF2AK2, HLA-C, POLR2B, RELA, CD44, HLA-B, VIM      |
| hsa05416 | Viral myocarditis                   | 4                   | 56                    | 1.1      | 0.0123               | CD55, HLA-C, HLA-B, EIF4G1                          |

| Term ID  | Term description         | Observed gene count | Background gene count | Strength | False discovery rate | Matching proteins in the network |
|----------|--------------------------|---------------------|-----------------------|----------|----------------------|----------------------------------|
| hsa04512 | ECM-receptor interaction | 2                   | 81                    | 1.73     | 0.0125               | TNC, COL4A2                      |
| hsa04510 | Focal adhesion           | 2                   | 197                   | 1.34     | 0.0353               | TNC, COL4A2                      |

Comparison of n=6 different samples/group obtained from 10 independent cell cultures.

**Supplemental Table 4. List of all proteins identified by label free proteomics analysis.**

| Accession | Description                                                                                                       | Coverage [%] | # PSMs | # Unique Peptides | Antitriptyline 1 | Antitriptyline 2 | Antitriptyline 3 | Antitriptyline 4 | Antitriptyline 5 | Antitriptyline 6 | Vehicle 1 | Vehicle 2 | Vehicle 3 | Vehicle 4 | Vehicle 5 | Vehicle 6 | Average abundance | Average velocity | Ratio antitriptyline/vehicle | Log 2 fold change (antitriptyline/vehicle) | P-value      |
|-----------|-------------------------------------------------------------------------------------------------------------------|--------------|--------|-------------------|------------------|------------------|------------------|------------------|------------------|------------------|-----------|-----------|-----------|-----------|-----------|-----------|-------------------|------------------|------------------------------|--------------------------------------------|--------------|
| P8371     | Tubulin beta-4B chain OS=Homo sapiens OX-9606 GN-TUBB4B PE=1 SV=1                                                 | 81           | 5349   | 2                 | 7.20E+05         | 1.58E+09         | 1.79E+09         | 1.67E+09         | 1.72E+09         | 1.81E+09         | 1.39E+09  | 1.39E+09  | 1.58E+09  | 1.43E+09  | 1.55E+09  | 1.68E+09  | 1.71E+09          | 1.71E+09         | 1.50E+09                     | 1.14                                       | 0.00672027   |
| Q71U36    | Tubulin alpha-1A chain OS=Homo sapiens OX-9606 GN-TUBA1A PE=1 SV=1                                                | 77           | 3804   | 2                 | 1.70E+05         | 8.77E+06         | 1.75E+07         | 1.02E+07         | 1.02E+07         | 1.08E+07         | 1.02E+07  | 1.36E+07  | 6.14E+06  | 1.58E+07  | 1.32E+07  | 1.14E+07  | 1.14E+07          | 1.14E+07         | 1.60E+07                     | 0.98                                       | 0.927398077  |
| Q9BOE3    | Tubulin alpha-1C chain OS=Homo sapiens OX-9606 GN-TUBA1C PE=1 SV=1                                                | 73           | 3200   | 2                 | 1.78E+05         | 1.89E+09         | 1.99E+09         | 1.71E+09         | 1.82E+09         | 1.88E+09         | 1.55E+09  | 1.60E+09  | 1.61E+09  | 1.62E+09  | 1.75E+09  | 1.55E+09  | 1.84E+09          | 1.84E+09         | 1.61E+09                     | 1.14                                       | 0.000983406  |
| Q7L7L0    | Histone H2A type 3 OS=Homo sapiens OX-9606 GN-HIST3H2A PE=1 SV=3                                                  | 64           | 2655   | 2                 | 2.31E+05         | 2.19E+08         | 3.22E+08         | 2.42E+08         | 2.00E+08         | 1.76E+08         | 2.05E+08  | 2.78E+08  | 2.58E+08  | 3.62E+08  | 2.67E+08  | 1.64E+08  | 2.32E+08          | 2.32E+08         | 2.55E+08                     | 0.91                                       | 0.505091271  |
| P10412    | Histone H1.4 OS=Homo sapiens OX-9606 GN-H1.4 PE=1 SV=2                                                            | 39           | 706    | 2                 | 1.89E+05         | 1.91E+09         | 1.70E+09         | 1.82E+09         | 1.81E+09         | 1.75E+09         | 1.60E+09  | 1.69E+09  | 1.70E+09  | 1.62E+09  | 1.60E+09  | 1.58E+09  | 1.81E+09          | 1.81E+09         | 1.63E+09                     | 1.11                                       | 0.01966657   |
| Q56281    | Keratin type I cytoskeletal 6B OS=Homo sapiens OX-9606 GN-KRT6B PE=1 SV=5                                         | 32           | 706    | 2                 | 1.89E+05         | 1.91E+09         | 1.70E+09         | 1.82E+09         | 1.81E+09         | 1.75E+09         | 1.60E+09  | 1.69E+09  | 1.70E+09  | 1.62E+09  | 1.60E+09  | 1.58E+09  | 1.81E+09          | 1.81E+09         | 1.63E+09                     | 1.11                                       | 0.01966657   |
| Q56281    | Beta-actin-like protein 2 OS=Homo sapiens OX-9606 GN-ACTL2 PE=1 SV=2                                              | 32           | 1284   | 2                 | 1.15E+05         | 4.90E+05         | 1.31E+06         | 3.10E+05         | 1.15E+05         | 1.15E+05         | 1.75E+05  | 1.05E+06  | 2.51E+05  | 1.75E+05  | 1.07E+06  | 7.88E+05  | 8.83E+05          | 8.83E+05         | 5.74E+05                     | 0.62                                       | 0.32925262   |
| Q13310    | Polyadenylate-binding protein 4 OS=Homo sapiens OX-9606 GN-PABPC4 PE=1 SV=1                                       | 14           | 88     | 2                 | 1.88E+06         | 2.49E+06         | 1.84E+06         | 2.07E+06         | 2.14E+06         | 1.65E+06         | 1.74E+06  | 1.85E+06  | 1.61E+06  | 1.73E+06  | 1.23E+06  | 1.49E+06  | 2.01E+06          | 2.01E+06         | 1.61E+06                     | 1.25                                       | 0.023859109  |
| P62820    | Ras-related protein Rab-1A OS=Homo sapiens OX-9606 GN-RAB1A PE=1 SV=3                                             | 54           | 91     | 2                 | 6.67E+06         | 8.09E+06         | 4.82E+06         | 5.06E+06         | 4.88E+06         | 4.99E+06         | 6.53E+06  | 4.64E+06  | 5.16E+06  | 4.89E+06  | 5.34E+06  | 5.75E+06  | 5.75E+06          | 5.75E+06         | 0.30                         | 0.984813058                                |              |
| P08754    | Guanine nucleotide-binding protein (G) subunit alpha OS=Homo sapiens OX-9606 GN-GNAI3 PE=1 SV=3                   | 21           | 120    | 2                 | 1.66E+06         | 2.31E+06         | 2.28E+06         | 1.12E+06         | 1.23E+06         | 1.53E+06         | 1.67E+06  | 1.26E+06  | 1.62E+06  | 1.91E+06  | 1.11E+06  | 1.72E+06  | 1.72E+06          | 1.72E+06         | 1.03                         | 0.34238845                                 |              |
| P62873    | Guanine nucleotide-binding protein (G) subunit beta-1 OS=Homo sapiens OX-9606 GN-GNB1 PE=1 SV=3                   | 21           | 174    | 2                 | 7.07E+06         | 6.59E+06         | 6.89E+06         | 7.16E+06         | 7.33E+06         | 8.12E+06         | 7.13E+06  | 7.19E+06  | 6.71E+06  | 8.14E+06  | 6.80E+06  | 6.91E+06  | 7.19E+06          | 7.19E+06         | 7.03E+06                     | 0.30                                       | 0.852075449  |
| Q42919    | Altoxin B1 subunit OS=Homo sapiens OX-9606 GN-AR7B2 PE=1 SV=3                                                     | 15           | 34     | 2                 | 1.43E+07         | 1.43E+07         | 1.29E+07         | 1.29E+07         | 1.29E+07         | 1.29E+07         | 1.29E+07  | 8.81E+06  | 7.29E+06  | 8.81E+06  | 7.29E+06  | 8.81E+06  | 7.29E+06          | 7.29E+06         | 8.81E+06                     | 1.41                                       | 0.004861774  |
| Q15836    | Vesicle-associated membrane protein 3 OS=Homo sapiens OX-9606 GN-VAMP3 PE=1 SV=3                                  | 24           | 56     | 2                 | 3.17E+06         | 4.53E+06         | 5.86E+06         | 6.42E+06         | 5.78E+06         | 8.20E+06         | 8.46E+06  | 8.62E+06  | 1.61E+06  | 7.29E+06  | 2.70E+06  | 5.66E+06  | 5.66E+06          | 5.66E+06         | 1.35E+06                     | 4.19                                       | 0.000754519  |
| P05148    | Guanine nucleotide-binding protein (G) subunit alpha OS=Homo sapiens OX-9606 GN-GNAQ PE=1 SV=4                    | 16           | 32     | 2                 | 4.48E+06         | 6.55E+06         | 4.74E+06         | 4.71E+06         | 3.69E+06         | 4.47E+06         | 3.21E+06  | 3.17E+06  | 3.17E+06  | 2.29E+06  | 3.44E+06  | 4.77E+06  | 4.77E+06          | 4.77E+06         | 2.07                         | 0.006232056                                |              |
| P28482    | Mtogen-activated protein kinase 1 OS=Homo sapiens OX-9606 GN-MAPK1 PE=1 SV=3                                      | 14           | 74     | 2                 | 7.49E+06         | 7.48E+06         | 7.84E+06         | 8.75E+06         | 7.28E+06         | 7.87E+06         | 8.94E+06  | 8.37E+06  | 9.63E+06  | 8.19E+06  | 9.13E+06  | 8.29E+06  | 7.79E+06          | 7.79E+06         | 8.76E+06                     | 0.89                                       | 0.10196294   |
| Q16629    | Serine/arginine-rich splicing factor 7 OS=Homo sapiens OX-9606 GN-SRSF7 PE=1 SV=1                                 | 16           | 72     | 2                 | 1.47E+07         | 1.20E+07         | 8.62E+06         | 9.13E+06         | 9.02E+06         | 9.60E+06         | 9.31E+06  | 8.31E+06  | 4.70E+06  | 8.15E+06  | 6.44E+06  | 6.95E+06  | 1.05E+07          | 1.05E+07         | 7.31E+06                     | 0.57                                       | 0.023709989  |
| P09972    | Fructose-bisphosphate aldolase C OS=Homo sapiens OX-9606 GN-ALDOCE PE=1 SV=2                                      | 17           | 54     | 2                 | 2.39E+06         | 2.70E+06         | 2.37E+06         | 1.85E+06         | 1.80E+06         | 2.78E+06         | 3.10E+06  | 1.77E+06  | 6.09E+05  | 1.29E+06  | 1.48E+06  | 9.99E+05  | 2.58E+06          | 2.58E+06         | 1.26E+06                     | 2.06                                       | 0.030700268  |
| P31940    | Succinate dehydrogenase [ubiquinol] flavoprotein subunit, mitochondrial OS=Homo sapiens OX-9606 GN-SDHA PE=1 SV=2 | 6            | 20     | 2                 | 4.37E+06         | 2.70E+06         | 2.91E+06         | 2.87E+06         | 1.80E+06         | 3.67E+06         | 3.10E+06  | 1.77E+06  | 6.09E+05  | 1.29E+06  | 1.48E+06  | 9.99E+05  | 2.58E+06          | 2.58E+06         | 1.26E+06                     | 2.06                                       | 0.030700268  |
| Q43809    | Cleavage and polyadenylation specificity factor subunit 5 OS=Homo sapiens OX-9606 GN-NLUDT21 PE=1 SV=1            | 21           | 14     | 2                 | 1.71E+06         | 2.76E+06         | 2.91E+06         | 2.78E+06         | 2.99E+06         | 1.50E+06         | 1.40E+06  | 1.31E+06  | 1.98E+06  | 1.57E+06  | 8.67E+05  | 1.16E+06  | 2.44E+06          | 2.44E+06         | 1.38E+06                     | 1.77                                       | 0.04094725   |
| Q9NRV6    | Phospholipid scramblase 3 OS=Homo sapiens OX-9606 GN-PLSCR3 PE=1 SV=2                                             | 11           | 25     | 2                 | 6.49E+06         | 3.68E+06         | 5.38E+06         | 1.77E+06         | 3.85E+06         | 5.26E+06         | 2.48E+06  | 3.15E+06  | 5.13E+06  | 2.55E+06  | 4.17E+06  | 3.60E+06  | 4.40E+06          | 4.40E+06         | 3.51E+06                     | 1.25                                       | 0.329367072  |
| P58107    | Epilipkin OS=Homo sapiens OX-9606 GN-EPPK1 PE=1 SV=3                                                              | 5            | 34     | 2                 | 1.11E+06         | 7.30E+05         | 1.05E+06         | 1.10E+06         | 1.03E+06         | 1.82E+06         | 5.03E+06  | 2.50E+06  | 2.12E+06  | 4.07E+06  | 3.17E+06  | 3.26E+06  | 1.22E+06          | 1.22E+06         | 3.02E+06                     | -1.31                                      | 0.00304223   |
| Q01650    | Large neutral amino acids transporter small subunit 1 OS=Homo sapiens OX-9606 GN-SLC7A5 PE=1 SV=2                 | 6            | 34     | 2                 | 5.84E+06         | 6.43E+06         | 7.64E+06         | 7.02E+06         | 6.73E+06         | 6.97E+06         | 3.22E+06  | 3.04E+06  | 3.40E+06  | 3.69E+06  | 2.48E+06  | 2.39E+06  | 6.77E+06          | 6.77E+06         | 3.04E+06                     | 2.23                                       | 0.1665275E07 |
| P28161    | Neuro-S transmembrane 2 OS=Homo sapiens OX-9606 GN-NS2M2 PE=1 SV=2                                                | 13           | 54     | 2                 | 2.88E+07         | 2.43E+07         | 2.29E+07         | 2.08E+07         | 2.16E+07         | 2.31E+07         | 4.14E+07  | 3.48E+07  | 3.19E+07  | 2.76E+07  | 3.23E+07  | 3.23E+07  | 2.36E+07          | 2.36E+07         | 3.34E+07                     | 0.71                                       | 0.017663338  |
| P48105    | 60S ribosomal protein L21 OS=Homo sapiens OX-9606 GN-RPL21 PE=1 SV=2                                              | 14           | 50     | 2                 | 2.37E+06         | 2.98E+07         | 3.03E+07         | 2.95E+07         | 2.95E+07         | 3.97E+06         | 1.55E+07  | 1.71E+07  | 1.72E+07  | 1.68E+07  | 1.33E+07  | 1.13E+07  | 1.52E+07          | 1.52E+07         | 1.06                         | 0.000232838                                |              |
| Q13765    | Nascent polypeptide-associated complex subunit alpha OS=Homo sapiens OX-9606 GN-NACA PE=1 SV=1                    | 13           | 36     | 2                 | 1.03E+07         | 1.14E+07         | 8.21E+06         | 1.21E+07         | 1.28E+07         | 1.03E+07         | 7.53E+06  | 7.70E+06  | 7.42E+06  | 7.13E+06  | 6.17E+06  | 5.83E+06  | 1.08E+07          | 1.08E+07         | 6.96E+06                     | 1.56                                       | 0.001031881  |
| Q15286    | Ras-related protein Rab-35 OS=Homo sapiens OX-9606 GN-RAB35 PE=1 SV=1                                             | 23           | 63     | 2                 | 1.62E+06         | 1.57E+06         | 2.59E+06         | 2.60E+06         | 2.68E+06         | 2.96E+06         | 1.20E+06  | 1.56E+06  | 1.57E+06  | 2.25E+06  | 1.60E+06  | 1.15E+06  | 2.34E+06          | 2.34E+06         | 1.56E+06                     | 0.69                                       | 0.025175228  |
| P21964    | Catechol O-methyltransferase OS=Homo sapiens OX-9606 GN-COMT PE=1 SV=2                                            | 12           | 16     | 2                 | 7.52E+05         | 5.21E+06         | 1.38E+06         | 3.17E+06         | 1.29E+06         | 5.96E+06         | 2.23E+06  | 8.44E+06  | 3.10E+06  | 5.18E+06  | 7.75E+06  | 6.81E+06  | 2.96E+06          | 2.96E+06         | 5.99E+06                     | 0.53                                       | 0.084567892  |
| P53999    | Activated RNA polymerase II transcriptional coactivator p15 OS=Homo sapiens OX-9606 GN-SUB1 PE=1 SV=3             | 19           | 28     | 2                 | 8.04E+06         | 6.16E+06         | 3.29E+06         | 6.73E+06         | 3.76E+06         | 6.25E+06         | 3.15E+06  | 6.27E+06  | 3.29E+06  | 1.57E+06  | 3.10E+06  | 4.00E+06  | 5.71E+06          | 5.71E+06         | 4.06E+06                     | 1.40                                       | 0.49115204   |
| Q14617    | AP-3 complex subunit delta-3 OS=Homo sapiens OX-9606 GN-AP3D3 PE=1 SV=1                                           | 3            | 32     | 2                 | 6.75E+06         | 7.81E+06         | 6.39E+06         | 4.07E+06         | 4.03E+06         | 6.35E+07         | 3.17E+06  | 4.50E+06  | 4.22E+06  | 3.47E+06  | 4.84E+06  | 3.47E+06  | 3.95E+06          | 3.95E+06         | 1.51                         | 0.001005796                                |              |
| Q16712    | Glutathione S-transferase A3 OS=Homo sapiens OX-9606 GN-GSTA3 PE=1 SV=3                                           | 21           | 28     | 2                 | 3.69E+07         | 4.85E+07         | 6.84E+07         | 4.07E+06         | 6.35E+07         | 6.47E+07         | 8.02E+07  | 8.02E+07  | 7.08E+07  | 8.02E+07  | 8.02E+07  | 8.02E+07  | 8.02E+07          | 8.02E+07         | 7.86E+07                     | 0.76                                       | 0.124000400  |
| P10301    | Ras-related protein R-Ras OS=Homo sapiens OX-9606 GN-RRAS PE=1 SV=1                                               | 20           | 28     | 2                 | 3.74E+06         | 4.33E+06         | 3.71E+06         | 4.14E+06         | 3.9E+06          | 4.97E+06         | 3.35E+06  | 2.13E+06  | 1.82E+06  | 2.75E+06  | 2.59E+06  | 1.56E+06  | 4.03E+06          | 4.03E+06         | 3.85E+06                     | 0.77                                       | 0.000838833  |
| Q08170    | Serine/arginine-rich splicing factor 4 OS=Homo sapiens OX-9606 GN-SRSF4 PE=1 SV=2                                 | 11           | 75     | 2                 | 2.55E+07         | 2.80E+07         | 3.10E+07         | 3.31E+07         | 3.72E+07         | 3.08E+07         | 2.53E+07  | 2.62E+07  | 2.83E+07  | 2.63E+07  | 2.41E+07  | 2.37E+07  | 3.09E+07          | 3.09E+07         | 2.57E+07                     | 0.27                                       | 0.02241621   |
| P13693    | Transcriptionally-controlled tumor protein OS=Homo sapiens OX-9606 GN-TPT1 PE=1 SV=1                              | 31           | 10     | 2                 | 4.54E+06         | 3.91E+06         | 3.52E+06         | 4.06E+06         | 1.68E+06         | 4.73E+06         | 1.96E+06  | 3.99E+06  | 3.09E+06  | 2.22E+06  | 6.05E+06  | 5.26E+06  | 3.74E+06          | 3.74E+06         | 3.76E+06                     | 0.99                                       | 0.980630094  |
| Q9HC07    | Transmembrane protein 165 OS=Homo sapiens OX-9606 GN-TMEM165 PE=1 SV=1                                            | 14           | 18     | 2                 | 6.67E+06         | 7.12E+06         | 5.89E+06         | 7.69E+06         | 7.63E+06         | 6.85E+06         | 5.41E+06  | 5.87E+06  | 7.03E+06  | 5.82E+06  | 7.84E+06  | 3.76E+06  | 7.01E+06          | 7.01E+06         | 5.95E+06                     | 1.18                                       | 0.139131248  |
| Q9N8M4    | Viscagin OS=Homo sapiens OX-9606 GN-VISN PE=1 SV=1                                                                | 12           | 18     | 2                 | 4.80E+06         | 3.85E+06         | 2.46E+06         | 3.53E+06         | 3.05E+06         | 3.05E+06         | 3.64E+06  | 4.95E+06  | 8.11E+06  | 1.64E+06  | 5.59E+06  | 2.76E+06  | 3.47E+06          | 3.47E+06         | 2.39E+06                     | 0.54                                       | 0.003309177  |
| P48055    | LM and secretory cell antigen-like-containing domain protein OS=Homo sapiens OX-9606 GN-LMS1 PE=1 SV=4            | 14           | 50     | 2                 | 1.11E+07         | 7.77E+06         | 9.95E+06         | 7.85E+06         | 1.02E+07         | 9.95E+06         | 1.16E+07  | 1.02E+07  | 1.02E+07  | 1.02E+07  | 1.02E+07  | 1.02E+07  | 1.02E+07          | 1.02E+07         | 0.72                         | 0.022545847                                |              |
| Q9BWD1    | Acetyl-CoA acyltransferase, cytosolic OS=Homo sapiens OX-9606 GN-ACAT2 PE=1 SV=2                                  | 13           | 6      | 2                 | 2.76E+06         | 2.23E+06         | 1.64E+06         | 2.47E+06         | 1.71E+06         | 2.31E+06         | 4.73E+06  | 2.91E+06  | 1.23E+06  | 1.69E+06  | 1.10E+06  | 9.05E+05  | 2.19E+06          | 2.19E+06         | 1.06                         | 0.89511115                                 |              |
| P55809    | Succinyl-CoA:3-ketoacid coenzyme A transferase 1, mitochondrial OS=Homo sapiens OX-9606 GN-OXCT1 PE=1 SV=1        | 9            | 10     | 2                 | 3.56E+06         | 2.72E+06         | 2.61E+06         | 2.80E+06         | 2.33E+06         | 2.45E+06         | 2.57E+06  | 7.20E+05  | 1.48E+06  | 1.49E+06  | 2.42E+06  | 2.03E+06  | 3.04E+06          | 3.04E+06         | 1.78E+06                     | 0.77                                       | 0.10120172   |
| P11310    | Medium-chain specific acyl-CoA dehydrogenase, mitochondrial OS=Homo sapiens OX-9606 GN-ACADM PE=1 SV=1            | 10           | 14     | 2                 | 1                |                  |                  |                  |                  |                  |           |           |           |           |           |           |                   |                  |                              |                                            |              |

Supplementary Table 4. List of all proteins identified by label free proteomics analysis.

| Accession | Description                                                                                                  | Coverage [%] | iPSM | # Unique Peptides | Antitriptyline 1 | Antitriptyline 2 | Antitriptyline 3 | Antitriptyline 4 | Antitriptyline 5 | Antitriptyline 6 | Vehicle 1 | Vehicle 2 | Vehicle 3 | Vehicle 4 | Vehicle 5 | Vehicle 6 | Average antitriptyline | Average vehicle | Ratio antitriptyline/vehicle | Log 2 fold change (antitriptyline/vehicle) | P-value   |     |
|-----------|--------------------------------------------------------------------------------------------------------------|--------------|------|-------------------|------------------|------------------|------------------|------------------|------------------|------------------|-----------|-----------|-----------|-----------|-----------|-----------|------------------------|-----------------|------------------------------|--------------------------------------------|-----------|-----|
| P08237    | ATP-dependent 1-phosphofructokinase, muscle type OS=Homo sapiens OX=9606 GN=PFKM PE=1 SV=2                   | 4            | 31   | 2                 | 3.36E+07         | 3.55E+06         | 3.32E+06         | 3.58E+06         | 3.29E+06         | 2.64E+06         | 3.19E+06  | 3.14E+06  | 3.20E+06  | 3.29E+06  | 3.09E+06  | 2.54E+06  | 3.29E+06               | 3.29E+06        | 1.00                         | 0.2480964                                  | 0.07      |     |
| P48888    | Sulfotransferase 1E1 OS=Homo sapiens OX=9606 GN=SULT1E1 PE=1 SV=1                                            | 6            | 70   | 2                 | 1.12E+07         | 1.10E+07         | 2.36E+07         | 2.45E+07         | 2.68E+07         | 1.84E+07         | 2.99E+07  | 4.45E+07  | 3.68E+07  | 2.97E+07  | 2.73E+07  | 1.92E+07  | 1.92E+07               | 3.27E+07        | 0.70                         | 0.006451522                                | 0.10      |     |
| Q92974    | Rho guanine nucleotide exchange factor 2 OS=Homo sapiens OX=9606 GN=ARHGEF2 PE=1 SV=4                        | 3            | 6    | 2                 | 4.38E+05         | 1.83E+06         | 1.48E+06         | 9.46E+05         | 2.16E+06         | 1.24E+06         | 3.49E+05  | 6.85E+05  | 4.71E+05  | 3.60E+05  | 7.24E+05  | 1.37E+06  | 1.37E+06               | 6.38E+05        | 2.15                         | 0.076597122                                | 1.10      |     |
| O60664    | Perilipin-3 OS=Homo sapiens OX=9606 GN=PLIN3 PE=1 SV=3                                                       | 3            | 18   | 2                 | 2.96E+06         | 2.74E+06         | 2.63E+06         | 3.40E+06         | 2.92E+06         | 2.30E+06         | 2.02E+06  | 1.29E+06  | 9.25E+05  | 1.41E+06  | 1.40E+06  | 1.20E+06  | 2.82E+06               | 1.37E+06        | 2.06                         | 1.0                                        | 4.331E+05 | 0.5 |
| P23468    | Receptor-type tyrosine-protein phosphatase delta OS=Homo sapiens OX=9606 GN=PTPRD PE=1 SV=2                  | 10           | 26   | 2                 | 2.83E+06         | 2.39E+06         | 3.21E+06         | 2.65E+06         | 2.95E+06         | 1.93E+06         | 3.83E+06  | 3.17E+06  | 2.98E+06  | 3.22E+06  | 2.98E+06  | 2.66E+06  | 2.66E+06               | 3.27E+06        | 0.81                         | 0.049632038                                | 0.30      |     |
| P06866    | Myosin protein-like protein 1 OS=Homo sapiens OX=9606 GN=MYO1B PE=1 SV=1                                     | 19           | 54   | 2                 | 2.83E+06         | 2.47E+06         | 3.87E+06         | 3.45E+06         | 3.00E+06         | 2.00E+06         | 1.33E+06  | 1.76E+06  | 1.34E+06  | 1.33E+06  | 1.34E+06  | 1.37E+06  | 2.66E+06               | 1.37E+06        | 2.21                         | 0.001098828                                | 1.15      |     |
| P25272    | Heterogeneous nuclear ribonucleoprotein M OS=Homo sapiens OX=9606 GN=HNRNPM PE=1 SV=3                        | 3            | 34   | 2                 | 1.83E+07         | 1.75E+07         | 1.57E+07         | 1.92E+07         | 1.64E+07         | 1.70E+07         | 1.28E+07  | 1.42E+07  | 1.47E+07  | 1.10E+07  | 1.11E+07  | 1.60E+07  | 1.73E+07               | 1.33E+07        | 1.31                         | 0.037759562                                | 0.90      |     |
| Q16836    | Hydroxyacyl-coenzyme A dehydrogenase, mitochondrial OS=Homo sapiens OX=9606 GN=HADH PE=1 SV=3                | 3            | 22   | 2                 | 1.05E+07         | 1.20E+07         | 7.04E+06         | 8.88E+06         | 6.65E+06         | 7.03E+06         | 6.09E+06  | 5.54E+06  | 6.63E+06  | 3.48E+06  | 3.90E+06  | 3.82E+06  | 8.68E+06               | 4.41E+06        | 1.97                         | 0.003213492                                | 0.96      |     |
| P13489    | Ribonucleic acid inhibitor OS=Homo sapiens OX=9606 GN=RNHI PE=1 SV=2                                         | 6            | 12   | 2                 | 3.03E+06         | 3.61E+06         | 2.81E+06         | 3.12E+06         | 3.87E+06         | 2.69E+06         | 2.90E+06  | 1.65E+06  | 1.67E+06  | 1.90E+06  | 9.40E+05  | 1.42E+06  | 3.19E+06               | 1.42E+06        | 2.25                         | 0.003485861                                | 1.56      |     |
| Q14444    | Capprin-1 OS=Homo sapiens OX=9606 GN=CAPRN1 PE=1 SV=2                                                        | 5            | 8    | 2                 | 2.74E+06         | 1.99E+06         | 3.38E+06         | 2.83E+06         | 3.38E+06         | 3.04E+06         | 9.42E+05  | 1.79E+06  | 2.11E+06  | 1.20E+06  | 1.91E+06  | 1.54E+06  | 2.89E+06               | 1.83E+06        | 1.56                         | 0.003485861                                | 1.56      |     |
| P06866    | RNA-binding protein FUS OS=Homo sapiens OX=9606 GN=FUS PE=1 SV=1                                             | 19           | 54   | 2                 | 5.74E+06         | 5.10E+06         | 4.98E+06         | 4.81E+06         | 4.08E+06         | 3.81E+06         | 4.87E+06  | 1.56E+06  | 1.70E+06  | 1.85E+06  | 1.78E+06  | 1.12E+06  | 4.72E+06               | 1.71E+06        | 2.76                         | 4.2838E-05                                 | 0.47      |     |
| Q7R1V2    | Glutathione S-transferase A5 OS=Homo sapiens OX=9606 GN=GSTA5 PE=1 SV=1                                      | 7            | 270  | 2                 | 5.97E+07         | 5.78E+07         | 5.22E+07         | 5.68E+07         | 5.27E+07         | 4.54E+07         | 7.24E+07  | 6.94E+07  | 7.65E+07  | 8.07E+07  | 6.28E+07  | 4.92E+07  | 5.41E+07               | 6.85E+07        | 0.79                         | 0.024471466                                | 0.94      |     |
| Q8TBC4    | NEDD8-activating enzyme E1 catalytic subunit OS=Homo sapiens OX=9606 GN=NEDD8 PE=1 SV=2                      | 9            | 13   | 2                 | 1.03E+06         | 1.03E+06         | 7.96E+05         | 3.26E+06         | 8.38E+05         | 2.29E+06         | 5.02E+05  | 1.76E+06  | 1.75E+06  | 3.05E+06  | 1.64E+06  | 1.33E+06  | 1.64E+06               | 1.51E+06        | -0.12                        | 0.831342966                                | 0.34      |     |
| P61966    | AP-1 complex subunit sigma-1A OS=Homo sapiens OX=9606 GN=AP1S1 PE=1 SV=1                                     | 15           | 5    | 2                 | 3.88E+05         | 1.56E+06         | 2.77E+05         | 1.44E+06         | 8.54E+05         | 1.02E+06         | 3.29E+05  | 4.23E+05  | 3.67E+05  | 5.17E+05  | 5.50E+05  | 9.04E+05  | 5.35E+05               | 9.04E+05        | 1.69                         | 0.245743931                                | 0.76      |     |
| Q172E3    | ATP-dependent RNA helicase DHX30 OS=Homo sapiens OX=9606 GN=DHX30 PE=1 SV=1                                  | 4            | 4    | 2                 | 3.88E+05         | 1.56E+06         | 2.77E+05         | 1.44E+06         | 8.54E+05         | 1.02E+06         | 3.29E+05  | 4.23E+05  | 3.67E+05  | 5.17E+05  | 5.50E+05  | 9.04E+05  | 5.35E+05               | 9.04E+05        | 1.69                         | 0.245743931                                | 0.76      |     |
| Q14879    | Interferon-induced protein with tetratricopeptide repeats 3 OS=Homo sapiens OX=9606 GN=IFIT3 PE=1 SV=1       | 4            | 4    | 2                 | 1.43E+06         | 1.18E+06         | 1.58E+06         | 1.35E+06         | 2.08E+06         | 1.35E+06         | 1.96E+06  | 5.32E+06  | 1.49E+06  | 9.90E+06  | 1.57E+06  | 1.20E+06  | 1.37E+06               | 1.20E+06        | 1.04                         | 0.082383824                                | 2.06      |     |
| R40660    | Ran GTPase-activating protein 1 OS=Homo sapiens OX=9606 GN=RANGAP1 PE=1 SV=1                                 | 2            | 4    | 2                 | 2.40E+06         | 3.19E+06         | 2.89E+06         | 2.75E+06         | 1.33E+06         | 1.96E+06         | 6.28E+05  | 1.63E+06  | 1.49E+06  | 9.12E+05  | 9.50E+05  | 1.47E+06  | 1.20E+06               | 1.20E+06        | 1.97                         | 0.001291444                                | 1.07      |     |
| P32444    | Reiteration domain 14 kDa subunit OS=Homo sapiens OX=9606 GN=RP34 PE=1 SV=1                                  | 30           | 13   | 2                 | 4.84E+06         | 2.05E+06         | 1.42E+06         | 1.85E+06         | 1.62E+06         | 2.12E+06         | 2.84E+06  | 1.48E+06  | 1.58E+06  | 1.56E+06  | 1.36E+06  | 2.31E+06  | 1.78E+06               | 1.30            | 0.37361958                   | 0.88                                       |           |     |
| P11233    | Ras-related protein RaL OS=Homo sapiens OX=9606 GN=RALA PE=1 SV=1                                            | 19           | 8    | 2                 | 1.40E+06         | 1.95E+06         | 2.30E+06         | 2.06E+06         | 1.39E+06         | 1.23E+06         | 1.34E+06  | 1.04E+06  | 7.84E+05  | 1.83E+06  | 6.05E+05  | 1.87E+06  | 1.12E+06               | 1.67            | 0.024126592                  | 0.74                                       |           |     |
| P46783    | 40S ribosomal protein S10 OS=Homo sapiens OX=9606 GN=RPS10 PE=1 SV=1                                         | 15           | 58   | 2                 | 1.40E+07         | 9.03E+06         | 5.81E+06         | 1.05E+07         | 6.21E+06         | 2.10E+07         | 1.30E+07  | 5.92E+06  | 6.69E+06  | 5.19E+06  | 5.44E+06  | 9.30E+06  | 6.69E+06               | 1.39            | 0.47                         | 0.180156815                                | 0.74      |     |
| Q75821    | Eukaryotic translation initiation factor 3 subunit G OS=Homo sapiens OX=9606 GN=EIF3G PE=1 SV=2              | 13           | 6    | 2                 | 1.42E+06         | 5.93E+05         | 1.07E+06         | 1.53E+06         | 1.20E+06         | 1.87E+06         | 7.54E+05  | 4.96E+05  | 6.39E+05  | 3.85E+05  | 6.48E+05  | 6.40E+05  | 1.28E+06               | 5.94E+05        | 2.16                         | 0.10145098                                 | 0.81      |     |
| Q09439    | Cationic 2 OS=Homo sapiens OX=9606 GN=CN2 PE=1 SV=4                                                          | 13           | 25   | 2                 | 7.21E+06         | 6.98E+06         | 6.20E+06         | 6.41E+06         | 6.43E+06         | 5.39E+06         | 3.22E+06  | 3.80E+06  | 3.37E+06  | 4.59E+06  | 4.59E+06  | 4.68E+06  | 1.42E+06               | 4.48E+06        | 1.42                         | 0.02812715                                 | 1.42      |     |
| P22620    | CAMP-dependent protein kinase catalytic subunit beta OS=Homo sapiens OX=9606 GN=PRKACB PE=1 SV=2             | 19           | 54   | 2                 | 2.40E+06         | 2.58E+06         | 1.38E+06         | 1.91E+06         | 1.04E+06         | 1.31E+06         | 3.74E+06  | 3.37E+06  | 3.37E+06  | 2.01E+06  | 1.95E+06  | 2.70E+06  | 2.70E+06               | 2.70E+06        | 1.00                         | 0.196465508                                | 1.00      |     |
| P42167    | Lamina-associated polypeptide 2, isoforms beta/gamma OS=Homo sapiens OX=9606 GN=LMP2 PE=1 SV=2               | 9            | 12   | 2                 | 1.81E+06         | 4.74E+06         | 4.73E+06         | 5.04E+06         | 1.91E+06         | 1.74E+06         | 4.04E+06  | 4.56E+06  | 9.86E+05  | 4.55E+06  | 9.12E+05  | 3.37E+06  | 3.33E+06               | 3.07E+06        | 1.08                         | 0.179534212                                | 1.08      |     |
| P62847    | 40S ribosomal protein S24 OS=Homo sapiens OX=9606 GN=RPS24 PE=1 SV=1                                         | 20           | 53   | 2                 | 1.47E+07         | 1.35E+07         | 1.13E+07         | 1.12E+07         | 1.10E+07         | 1.10E+07         | 8.79E+06  | 1.03E+07  | 4.09E+06  | 4.07E+06  | 6.75E+06  | 5.43E+06  | 1.15E+07               | 6.57E+06        | 0.12                         | 0.005679177                                | 0.81      |     |
| Q12805    | EGF-containing fibronectin extracellular matrix protein 1 OS=Homo sapiens OX=9606 GN=EFEMP1 PE=1 SV=2        | 7            | 38   | 2                 | 6.75E+06         | 5.72E+06         | 5.52E+06         | 5.18E+06         | 5.93E+06         | 5.62E+06         | 9.27E+06  | 7.99E+06  | 9.32E+06  | 7.23E+06  | 8.43E+06  | 7.68E+06  | 5.77E+06               | 8.39E+06        | -0.54                        | 0.00419633                                 | 0.25      |     |
| Q75436    | Vacuolar protein sorting-associated protein 2beta OS=Homo sapiens OX=9606 GN=VPS26A PE=1 SV=2                | 9            | 7    | 2                 | 2.20E+06         | 3.25E+06         | 2.25E+06         | 2.56E+06         | 2.50E+06         | 2.80E+06         | 1.72E+06  | 1.58E+06  | 1.91E+06  | 4.91E+05  | 1.57E+06  | 1.68E+06  | 1.18E+06               | 1.25            | 0.002179393                  | 0.81                                       |           |     |
| Q09186    | LIM domain and actin-binding protein OS=Homo sapiens OX=9606 GN=LIMA1 PE=1 SV=1                              | 3            | 10   | 2                 | 1.71E+06         | 3.05E+06         | 3.19E+06         | 3.09E+06         | 2.93E+06         | 2.67E+06         | 1.16E+06  | 1.16E+06  | 1.13E+06  | 8.99E+05  | 2.74E+06  | 1.05E+06  | 1.38E+06               | 1.38E+06        | 1.00                         | 0.000447187                                | 0.81      |     |
| Q15637    | GTPase KRas OS=Homo sapiens OX=9606 GN=KRAS PE=1 SV=1                                                        | 20           | 4    | 2                 | 5.75E+06         | 5.75E+06         | 3.17E+06         | 3.74E+06         | 3.16E+06         | 6.91E+05         | 3.24E+06  | 5.89E+05  | 1.22E+06  | 2.25E+06  | 2.80E+06  | 3.38E+06  | 4.69E+06               | 3.66E+06        | 1.28                         | 0.196465508                                | 1.00      |     |
| Q9Y2V2    | Calcium-regulated heat-stable protein 1 OS=Homo sapiens OX=9606 GN=CAHSP1 PE=1 SV=2                          | 18           | 33   | 2                 | 3.58E+06         | 5.70E+06         | 5.02E+06         | 6.87E+06         | 5.12E+06         | 4.47E+06         | 4.94E+06  | 5.38E+06  | 4.99E+06  | 3.25E+06  | 5.12E+06  | 4.48E+06  | 5.13E+06               | 4.69E+06        | 1.09                         | 0.15481331                                 | 0.63      |     |
| P62306    | Small nuclear ribonucleoprotein F OS=Homo sapiens OX=9606 GN=SNRPF PE=1 SV=1                                 | 24           | 28   | 2                 | 6.90E+06         | 5.69E+06         | 4.66E+06         | 5.54E+06         | 4.52E+06         | 5.70E+06         | 4.06E+06  | 3.17E+06  | 4.53E+06  | 3.65E+06  | 2.24E+06  | 5.50E+06  | 3.62E+06               | 1.00            | 0.003112069                  | 0.60                                       |           |     |
| Q35747    | Serine/threonine-protein kinase OSR1 OS=Homo sapiens OX=9606 GN=OSR1 PE=1 SV=1                               | 8            | 3    | 2                 | 4.25E+06         | 4.57E+06         | 3.90E+06         | 1.91E+06         | 1.89E+06         | 1.48E+06         | 5.54E+06  | 1.79E+06  | 1.36E+06  | 5.28E+05  | 1.87E+06  | 1.78E+06  | 1.22E+06               | 1.46            | 0.66                         | 0.282184988                                | 0.55      |     |
| Q13414    | Zinc finger Z-type and EF-hand domain containing protein OS=Homo sapiens OX=9606 GN=ZFP1 PE=1 SV=6           | 27           | 8    | 2                 | 2.41E+06         | 3.90E+05         | 2.63E+06         | 1.91E+06         | 1.89E+06         | 1.48E+06         | 5.54E+06  | 1.79E+06  | 1.36E+06  | 5.28E+05  | 1.87E+06  | 1.78E+06  | 1.22E+06               | 1.46            | 0.66                         | 0.282184988                                | 0.55      |     |
| P23919    | Thymidylate kinase OS=Homo sapiens OX=9606 GN=TYMK PE=1 SV=4                                                 | 11           | 6    | 2                 | 2.94E+06         | 4.06E+06         | 2.44E+06         | 3.19E+06         | 1.38E+06         | 2.23E+06         | 8.28E+05  | 9.57E+05  | 7.09E+05  | 1.12E+06  | 9.84E+05  | 2.71E+06  | 9.19E+05               | 2.95            | 1.56                         | 0.004428635                                | 0.68      |     |
| P55735    | Protein SEC13 homolog OS=Homo sapiens OX=9606 GN=SEC13 PE=1 SV=3                                             | 7            | 25   | 2                 | 5.31E+06         | 4.51E+06         | 5.39E+06         | 5.09E+06         | 5.09E+06         | 4.94E+06         | 3.58E+06  | 2.43E+06  | 3.88E+06  | 3.48E+06  | 3.24E+06  | 2.83E+06  | 5.20E+06               | 3.24E+06        | 1.68                         | 5.55916E+05                                | 0.56      |     |
| P61077    | Ubiquitin-conjugating enzyme E2 D3 OS=Homo sapiens OX=9606 GN=UBE2D3 PE=1 SV=1                               | 20           | 13   | 2                 | 6.07E+06         | 7.24E+06         | 3.40E+06         | 6.96E+06         | 3.47E+06         | 4.51E+06         | 5.01E+06  | 5.01E+06  | 1.23E+06  | 1.97E+06  | 3.62E+06  | 2.70E+06  | 5.27E+06               | 2.95E+06        | 1.79                         | 0.02630549                                 | 0.81      |     |
| Q04828    | Aldo-keto reductase family 1 member C1 OS=Homo sapiens OX=9606 GN=AKR1C1 PE=1 SV=1                           | 6            | 53   | 2                 | 2.32E+07         | 2.60E+07         | 2.85E+07         | 3.19E+07         | 2.87E+07         | 2.68E+07         | 3.91E+07  | 4.12E+07  | 4.39E+07  | 4.28E+07  | 3.83E+07  | 3.38E+07  | 2.75E+07               | 3.98E+07        | 0.69                         | 8.51919E+05                                | 0.54      |     |
| Q10186    | Nuclear transport factor 2 OS=Homo sapiens OX=9606 GN=NUP214 PE=1 SV=1                                       | 28           | 16   | 2                 | 8.46E+06         | 7.74E+06         | 7.89E+06         | 1.19E+07         | 8.93E+06         | 1.19E+07         | 8.30E+06  | 8.68E+06  | 9.98E+06  | 9.89E+06  | 9.89E+06  | 8.86E+06  | 9.89E+06               | 1.08            | 0.000000000                  | 0.81                                       |           |     |
| Q9JL86    | Guanine nucleotide-binding protein (Gj)(Gs)(Go) subunit gamma-12 OS=Homo sapiens OX=9606 GN=GNNG12 PE=1 SV=3 | 32           | 24   | 2                 | 4.59E+06         | 3.99E+06         | 3.58E+06         | 4.50E+06         | 3.75E+06         | 4.63E+06         | 2.32E+06  | 3.57E+06  | 3.32E+06  | 3.42E+06  | 2.77E+06  | 2.48E+06  |                        |                 |                              |                                            |           |     |

**Supplemental Table 4. List of all proteins identified by label free proteomics analysis.**

| Accession | Description                                                                                         | Coverage [%] | # PSMs | # Unique Peptides | Antitriptyline 1 | Antitriptyline 2 | Antitriptyline 3 | Antitriptyline 4 | Antitriptyline 5 | Antitriptyline 6 | Vehicle 1 | Vehicle 2 | Vehicle 3 | Vehicle 4 | Vehicle 5 | Vehicle 6 | Average antitriptyline | Average vehicle | Ratio antitriptyline/vehicle | Log 2 fold change (antitriptyline/vehicle) | P-value |
|-----------|-----------------------------------------------------------------------------------------------------|--------------|--------|-------------------|------------------|------------------|------------------|------------------|------------------|------------------|-----------|-----------|-----------|-----------|-----------|-----------|------------------------|-----------------|------------------------------|--------------------------------------------|---------|
| Q86U2P    | Kinectin OS=Homo sapiens OX-9606 GN-KTNI PE=1 SV=1                                                  | 2            | 24     | 2                 | 2.46E+06         | 2.63E+06         | 1.77E+06         | 1.98E+06         | 2.40E+06         | 2.08E+06         | 3.20E+06  | 3.46E+06  | 4.07E+06  | 2.85E+06  | 3.49E+06  | 2.99E+06  | 2.22E+06               | 3.34E+06        | 1.50                         | 0.000622413                                | -0.59   |
| P61101    | Signal recognition particle 54 kDa protein OS=Homo sapiens OX-9606 GN-SRPA4 PE=1 SV=1               | 4            | 24     | 2                 | 5.49E+06         | 5.85E+06         | 4.43E+06         | 4.41E+06         | 4.56E+06         | 3.88E+06         | 2.99E+06  | 3.16E+06  | 2.52E+06  | 1.93E+06  | 1.35E+06  | 8.93E+05  | 2.45E+06               | 2.14E+06        | 0.87                         | 0.000338126                                | 2.22    |
| P27144    | Adenylate kinase 4, mitochondrial OS=Homo sapiens OX-9606 GN-AK4 PE=1 SV=1                          | 13           | 10     | 1                 | 1.90E+06         | 1.78E+06         | 1.90E+06         | 1.74E+06         | 1.57E+06         | 8.20E+05         | 1.08E+06  | 8.41E+05  | 9.82E+05  | 1.13E+06  | 6.88E+05  | 1.78E+06  | 9.23E+05               | 1.78E+06        | 1.93                         | 0.00256E+06                                | 1.93    |
| P07947    | Tyrosine protein kinase Yes OS=Homo sapiens OX-9606 GN-YES1 PE=1 SV=3                               | 4            | 61     | 2                 | 2.61E+06         | 2.97E+06         | 1.83E+06         | 3.08E+06         | 1.80E+06         | 3.72E+06         | 2.46E+06  | 1.78E+06  | 1.78E+06  | 2.20E+06  | 2.29E+06  | 3.06E+06  | 2.67E+06               | 2.26E+06        | 0.24                         | 0.002676934                                | 0.24    |
| P23538    | DNA (cytosine-5)-methyltransferase 1 OS=Homo sapiens OX-9606 GN-DNMT1 PE=1 SV=2                     | 2            | 5      | 2                 | 9.01E+06         | 1.31E+07         | 9.21E+06         | 1.39E+07         | 1.16E+07         | 8.94E+06         | 1.14E+07  | 1.67E+07  | 1.03E+07  | 1.82E+07  | 9.95E+06  | 8.96E+06  | 1.10E+07               | 1.26E+07        | 0.89                         | 0.04317191                                 | -0.19   |
| P07947    | Promoted cell death protein 1 OS=Homo sapiens OX-9606 GN-PCD1 PE=1 SV=2                             | 2            | 5      | 2                 | 2.32E+06         | 7.40E+06         | 6.87E+06         | 7.32E+06         | 6.87E+06         | 6.48E+06         | 5.05E+06  | 5.62E+06  | 5.62E+06  | 7.03E+06  | 5.87E+06  | 5.28E+06  | 5.28E+06               | 5.28E+06        | 0.55                         | 0.008957405                                | 1.47    |
| PR2750    | 60S ribosomal protein L23a OS=Homo sapiens OX-9606 GN-LRPL23A PE=1 SV=1                             | 16           | 13     | 2                 | 2.05E+06         | 3.20E+06         | 4.58E+06         | 3.61E+06         | 4.56E+06         | 3.52E+06         | 3.35E+06  | 2.07E+06  | 2.07E+06  | 2.55E+06  | 2.50E+06  | 2.39E+06  | 3.58E+06               | 2.74E+06        | 1.31                         | 0.100649406                                | -0.18   |
| P51610    | Host cell factor 1 OS=Homo sapiens OX-9606 GN-HCFC1 PE=1 SV=2                                       | 1            | 6      | 2                 | 5.52E+05         | 6.93E+05         | 7.11E+05         | 8.62E+05         | 1.00E+06         | 6.99E+05         | 3.41E+05  | 4.28E+05  | 4.96E+05  | 3.59E+05  | 3.59E+05  | 1.00E+06  | 7.53E+05               | 4.06E+05        | 0.89                         | 0.001781073                                | 1.85    |
| Q14247    | Src substrate cortactin OS=Homo sapiens OX-9606 GN-CTTN PE=1 SV=2                                   | 4            | 6      | 2                 | 4.76E+05         | 2.40E+06         | 3.21E+06         | 3.12E+06         | 3.31E+06         | 2.73E+06         | 1.74E+06  | 1.74E+06  | 4.98E+05  | 5.49E+05  | 1.00E+06  | 2.54E+06  | 9.48E+05               | 1.68            | 0.016237802                  | 2.68                                       |         |
| P23233    | Glutathione peroxidase 3 OS=Homo sapiens OX-9606 GN-GPX3 PE=1 SV=2                                  | 8            | 393    | 2                 | 1.95E+07         | 4.04E+07         | 4.12E+07         | 2.03E+07         | 2.56E+07         | 3.69E+07         | 3.53E+07  | 6.21E+07  | 3.54E+07  | 4.91E+07  | 4.96E+07  | 3.06E+07  | 4.47E+07               | 4.47E+07        | 0.67                         | 0.02723575                                 | -0.57   |
| Q3UKJ3    | Protein mono-ADP-ribosyltransferase PARP4 OS=Homo sapiens OX-9606 GN-PARP4 PE=1 SV=3                | 2            | 8      | 2                 | 2.21E+06         | 2.90E+06         | 3.27E+06         | 1.90E+06         | 9.45E+05         | 2.16E+06         | 1.46E+06  | 1.95E+06  | 4.85E+05  | 1.21E+06  | 6.30E+05  | 2.22E+06  | 3.26E+06               | 1.14E+06        | 1.96                         | 0.031716787                                | 0.97    |
| P08463    | Ketohexokinase OS=Homo sapiens OX-9606 GN-KHK1 PE=1 SV=2                                            | 6            | 8      | 2                 | 3.07E+06         | 2.94E+06         | 2.94E+06         | 2.94E+06         | 2.94E+06         | 2.22E+06         | 2.22E+06  | 2.70E+06  | 2.70E+06  | 3.12E+06  | 2.84E+06  | 2.70E+06  | 2.70E+06               | 2.70E+06        | 1.08                         | 0.357277000                                | 0.11    |
| QJUDY4    | DnaJ homolog subfamily B member 4 OS=Homo sapiens OX-9606 GN-DNAJB4 PE=1 SV=1                       | 6            | 16     | 2                 | 2.79E+06         | 4.11E+06         | 2.55E+06         | 3.76E+06         | 2.43E+06         | 3.97E+06         | 3.23E+06  | 2.79E+06  | 2.62E+06  | 2.55E+06  | 2.18E+06  | 2.82E+06  | 3.27E+06               | 2.70E+06        | 1.21                         | 0.13621765                                 | 1.21    |
| P61373    | 60S ribosomal protein L38 OS=Homo sapiens OX-9606 GN-LRPL38 PE=1 SV=2                               | 33           | 24     | 2                 | 6.91E+06         | 8.91E+06         | 1.10E+07         | 1.27E+07         | 1.11E+07         | 1.09E+07         | 6.86E+06  | 6.07E+06  | 9.12E+06  | 7.97E+06  | 8.14E+06  | 4.21E+06  | 1.03E+07               | 7.06E+06        | 0.54                         | 0.10947836                                 | 0.54    |
| Q9K6G9    | N-terminal kinase-like protein OS=Homo sapiens OX-9606 GN-SCYL1 PE=1 SV=1                           | 4            | 4      | 2                 | 9.96E+05         | 1.25E+06         | 1.15E+06         | 1.06E+06         | 9.06E+05         | 9.96E+05         | 7.44E+05  | 7.87E+05  | 8.02E+05  | 8.32E+05  | 5.91E+05  | 1.06E+06  | 7.69E+05               | 1.43            | 0.001253744                  | 1.43                                       |         |
| Q8NB95    | Solute carrier family 43 member 3 OS=Homo sapiens OX-9606 GN-SLC43A3 PE=1 SV=2                      | 5            | 18     | 2                 | 5.74E+06         | 5.90E+06         | 5.41E+06         | 5.53E+06         | 5.29E+06         | 5.06E+06         | 4.20E+06  | 3.98E+06  | 3.67E+06  | 4.13E+06  | 3.34E+06  | 3.41E+06  | 5.42E+06               | 3.79E+06        | 0.52                         | 1.18139E+05                                | 0.52    |
| P09595    | Cadherin alpha-1 (VX) chain OS=Homo sapiens OX-9606 GN-COL15A1 PE=1 SV=2                            | 1            | 34     | 2                 | 1.13E+07         | 1.23E+07         | 8.66E+06         | 9.25E+06         | 9.67E+06         | 9.40E+06         | 1.42E+07  | 1.56E+07  | 1.13E+07  | 1.32E+07  | 1.14E+07  | 1.19E+07  | 1.01E+07               | 1.29E+07        | -0.36                        | 0.10770158                                 | -0.36   |
| R01180    | Phosphatidylcholine-sterol acyltransferase OS=Homo sapiens OX-9606 GN-LCAT PE=1 SV=1                | 1            | 7      | 2                 | 1.35E+07         | 1.52E+07         | 2.86E+07         | 1.52E+07         | 1.37E+07         | 1.39E+07         | 1.22E+07  | 2.54E+07  | 2.44E+07  | 1.63E+07  | 1.86E+07  | 1.67E+07  | 2.18E+07               | 2.18E+07        | 0.77                         | 0.10581358                                 | 0.77    |
| Q15046    | Lysine-tRNA ligase OS=Homo sapiens OX-9606 GN-KARS1 PE=1 SV=1                                       | 5            | 3      | 2                 | 2.99E+06         | 4.24E+06         | 5.18E+06         | 4.11E+06         | 3.27E+06         | 3.57E+06         | 3.99E+06  | 4.41E+06  | 4.29E+06  | 2.60E+06  | 9.07E+05  | 4.04E+06  | 3.29E+06               | 1.23            | 0.0275313                    | 1.23                                       |         |
| Q8NB87    | Prostaglandin reductase 2 OS=Homo sapiens OX-9606 GN-PTGR2 PE=1 SV=1                                | 6            | 5      | 2                 | 5.54E+05         | 4.93E+05         | 4.03E+05         | 3.07E+05         | 4.17E+05         | 1.29E+06         | 1.19E+06  | 1.19E+06  | 1.28E+07  | 5.07E+05  | 7.07E+05  | 4.35E+05  | 8.36E+05               | 0.52            | 0.028612787                  | 0.52                                       |         |
| Q9BRLL6   | Serine/arginine-rich splicing factor 8 OS=Homo sapiens OX-9606 GN-SRSF8 PE=1 SV=1                   | 5            | 30     | 2                 | 9.24E+06         | 1.16E+07         | 1.06E+07         | 1.15E+07         | 1.13E+07         | 9.80E+06         | 1.12E+07  | 1.15E+07  | 1.28E+07  | 1.07E+07  | 1.10E+07  | 1.10E+07  | 1.10E+07               | 1.10E+07        | -0.14                        | 0.001034611                                | -0.14   |
| Q8NF17    | Nuclear pore complex protein Nup93 OS=Homo sapiens OX-9606 GN-NUP93 PE=1 SV=2                       | 2            | 24     | 2                 | 2.36E+06         | 3.34E+06         | 1.81E+06         | 3.22E+06         | 3.51E+06         | 2.74E+06         | 1.09E+06  | 2.32E+06  | 2.73E+06  | 3.10E+06  | 2.76E+06  | 6.81E+05  | 2.83E+06               | 2.11E+06        | 0.42                         | 0.176452279                                | 0.42    |
| Q13428    | Tracleal protein OS=Homo sapiens OX-9606 GN-TCOF1 PE=1 SV=3                                         | 2            | 2      | 2                 | 4.03E+06         | 3.83E+06         | 3.10E+06         | 3.14E+06         | 3.03E+06         | 6.02E+06         | 1.08E+06  | 1.18E+06  | 7.72E+05  | 1.52E+06  | 1.61E+06  | 1.49E+06  | 3.71E+06               | 1.49            | 0.00394E+06                  | 1.49                                       |         |
| P55991    | Actin-related protein 2/3 complex subunit 4 OS=Homo sapiens OX-9606 GN-ARPC4 PE=1 SV=3              | 16           | 16     | 2                 | 6.43E+06         | 6.02E+06         | 7.43E+06         | 8.29E+06         | 6.43E+06         | 6.02E+06         | 9.65E+06  | 8.99E+06  | 6.65E+06  | 6.65E+06  | 5.87E+06  | 5.87E+06  | 7.45E+06               | 5.87E+06        | 0.03                         | 0.009822100                                | 0.03    |
| Q8UKQ1    | DCC-interacting protein 13a-Alpha OS=Homo sapiens OX-9606 GN-APPL1 PE=1 SV=1                        | 4            | 11     | 2                 | 1.28E+06         | 1.72E+06         | 1.73E+06         | 1.90E+06         | 1.90E+06         | 1.61E+06         | 1.45E+06  | 1.68E+06  | 1.68E+06  | 2.16E+06  | 1.69E+06  | 1.69E+06  | 1.69E+06               | 1.69E+06        | 0.06                         | 0.775288131                                | 0.06    |
| Q02572    | AP-3 complex subunit sigma-1 OS=Homo sapiens OX-9606 GN-AP3S1 PE=1 SV=1                             | 12           | 17     | 2                 | 3.86E+06         | 4.73E+06         | 2.72E+06         | 3.73E+06         | 3.31E+06         | 2.87E+06         | 1.14E+06  | 1.98E+06  | 2.44E+06  | 1.21E+06  | 1.64E+06  | 3.53E+06  | 1.61E+06               | 1.14            | 0.000531902                  | -1.14                                      |         |
| P19367    | Hoxo kinase 1 OS=Homo sapiens OX-9606 GN-HK1 PE=1 SV=3                                              | 3            | 4      | 2                 | 3.13E+06         | 2.81E+06         | 2.68E+06         | 2.41E+06         | 2.91E+06         | 3.17E+06         | 1.54E+06  | 5.78E+05  | 6.01E+05  | 7.90E+05  | 1.16E+06  | 2.85E+06  | 1.91E+06               | 1.64            | 0.341232E+05                 | 1.64                                       |         |
| Q03722    | Leukocyte surface antigen CD47 OS=Homo sapiens OX-9606 GN-CD47 PE=1 SV=1                            | 5            | 48     | 2                 | 9.50E+06         | 1.04E+07         | 1.48E+07         | 1.07E+07         | 1.34E+07         | 9.27E+06         | 8.13E+06  | 8.44E+06  | 8.77E+06  | 7.23E+06  | 7.80E+06  | 5.50E+06  | 1.13E+07               | 7.63E+06        | 0.57                         | 0.001746523                                | 0.57    |
| Q07074    | cAMP-specific 3'-5'-cyclic phosphodiesterase OS=Homo sapiens OX-9606 GN-PDE5A PE=1 SV=2             | 2            | 3      | 2                 | 1.03E+06         | 1.03E+06         | 3.54E+06         | 4.80E+06         | 3.33E+06         | 2.10E+06         | 1.71E+06  | 1.71E+06  | 1.27E+06  | 1.12E+06  | 5.49E+05  | 1.55E+06  | 1.55E+06               | 1.55E+06        | 1.56                         | 0.012534034                                | 1.56    |
| Q8LKM9    | RNA-binding protein Rly1 OS=Homo sapiens OX-9606 GN-RALY1 PE=1 SV=1                                 | 6            | 15     | 2                 | 7.09E+06         | 7.58E+06         | 8.06E+06         | 8.79E+06         | 8.26E+06         | 7.94E+06         | 4.93E+06  | 5.13E+06  | 2.10E+06  | 1.68E+06  | 4.87E+06  | 4.17E+06  | 7.95E+06               | 3.81E+06        | 0.28                         | 0.000363003                                | -0.28   |
| Q13451    | Peptidyl-prolyl cis-trans isomerase FKBP5 OS=Homo sapiens OX-9606 GN-FKBP5 PE=1 SV=2                | 4            | 6      | 2                 | 1.49E+06         | 1.10E+06         | 1.05E+06         | 1.35E+06         | 1.26E+06         | 1.59E+06         | 5.90E+05  | 5.41E+05  | 6.33E+05  | 1.25E+06  | 1.94E+06  | 7.44E+06  | 3.88E+06               | 5.88E+05        | 2.12                         | 0.000654801                                | 2.12    |
| Q12846    | Syntaxin 4 OS=Homo sapiens OX-9606 GN-STX4 PE=1 SV=2                                                | 7            | 16     | 2                 | 2.94E+06         | 3.41E+06         | 3.81E+06         | 3.40E+06         | 3.31E+06         | 4.01E+06         | 2.67E+06  | 2.33E+06  | 2.33E+06  | 2.51E+06  | 1.94E+06  | 7.44E+06  | 3.28E+06               | 1.06            | 0.82510637                   | 1.06                                       |         |
| Q9Y272    | AP-3 complex subunit mu-1 OS=Homo sapiens OX-9606 GN-AP3M1 PE=1 SV=1                                | 4            | 14     | 2                 | 1.09E+06         | 9.78E+05         | 2.17E+06         | 1.73E+06         | 1.85E+06         | 2.01E+06         | 7.78E+05  | 1.34E+06  | 1.43E+06  | 6.88E+05  | 1.07E+06  | 9.94E+05  | 1.64E+06               | 1.05E+06        | 1.56                         | 0.035494254                                | 1.56    |
| Q06278    | Adhylin oxidase OS=Homo sapiens OX-9606 GN-AOX1 PE=1 SV=2                                           | 4            | 15     | 2                 | 9.74E+05         | 1.28E+06         | 1.51E+06         | 1.18E+06         | 1.65E+06         | 1.63E+06         | 1.63E+06  | 2.22E+06  | 2.07E+06  | 2.52E+06  | 1.84E+06  | 1.84E+06  | 1.24E+06               | 2.08E+06        | 0.75                         | 0.001151574                                | 0.75    |
| Q11619    | Lysosomal protective protein OS=Homo sapiens OX-9606 GN-LP1 PE=1 SV=2                               | 5            | 6      | 2                 | 3.91E+06         | 5.76E+06         | 4.01E+06         | 3.69E+06         | 2.68E+06         | 1.03E+06         | 2.19E+06  | 2.38E+06  | 2.46E+06  | 2.56E+06  | 7.96E+05  | 7.39E+05  | 3.51E+06               | 1.85E+06        | 1.89                         | 0.05396254                                 | 1.89    |
| Q7L106    | Basic leucine zipper and W2 domain-containing protein 1 OS=Homo sapiens OX-9606 GN-BZW1 PE=1 SV=1   | 5            | 21     | 2                 | 6.16E+06         | 2.55E+06         | 6.23E+06         | 1.76E+06         | 6.88E+06         | 5.53E+06         | 1.66E+06  | 5.89E+06  | 1.66E+06  | 5.54E+06  | 4.38E+06  | 4.38E+06  | 4.21E+06               | 4.38E+06        | 0.92                         | 0.166694136                                | 0.92    |
| Q15400    | Syntaxin 7 OS=Homo sapiens OX-9606 GN-STX7 PE=1 SV=4                                                | 8            | 5      | 2                 | 2.07E+06         | 2.04E+06         | 1.94E+06         | 1.88E+06         | 1.79E+06         | 5.45E+05         | 7.99E+05  | 8.03E+05  | 9.77E+05  | 8.08E+05  | 4.67E+05  | 1.71E+06  | 7.71E+05               | 2.21            | 0.100986842                  | 2.21                                       |         |
| Q7L3L4    | MOB kinase activator 1B OS=Homo sapiens OX-9606 GN-MOB1B PE=1 SV=3                                  | 9            | 28     | 2                 | 1.80E+06         | 2.28E+06         | 1.99E+06         | 2.92E+06         | 2.35E+06         | 2.73E+06         | 2.53E+06  | 2.65E+06  | 2.71E+06  | 2.90E+06  | 3.58E+06  | 2.06E+06  | 2.31E+06               | 2.74E+06        | 0.84                         | 0.158892327                                | -0.25   |
| P55991    | Protein kinase C and zeta1 kinase substrate protein 2 OS=Homo sapiens OX-9606 GN-PKCPSIN2 PE=1 SV=2 | 2            | 2      | 2                 | 1.82E+06         | 2.46E+06         | 2.44E+06         | 1.94E+06         | 2.05E+06         | 1.32E+06         | 1.04E+06  | 1.06E+06  | 9.35E+05  | 1.03E+06  | 1.03E+06  | 1.03E+06  | 1.03E+06               | 1.03E+06        | 1.06                         | 0.000378853                                | 1.06    |
| P53634    | Dipeptidyl peptidase 1 OS=Homo sapiens                                                              |              |        |                   |                  |                  |                  |                  |                  |                  |           |           |           |           |           |           |                        |                 |                              |                                            |         |

Supplemental Table 4. List of all proteins identified by label free proteomics analysis.

| Accession | Description                                                                                            | Coverage [%] | IPSM | # Unique Peptides | Antitripitlyne 1 | Antitripitlyne 2 | Antitripitlyne 3 | Antitripitlyne 4 | Antitripitlyne 5 | Antitripitlyne 6 | Vehicle 1 | Vehicle 2 | Vehicle 3 | Vehicle 4 | Vehicle 5 | Vehicle 6 | Average antitripitlyne | Average vehicle | Ratio antitripitlyne/vehicle | Log 2 fold change (antitripitlyne/vehicle) | P-value     |
|-----------|--------------------------------------------------------------------------------------------------------|--------------|------|-------------------|------------------|------------------|------------------|------------------|------------------|------------------|-----------|-----------|-----------|-----------|-----------|-----------|------------------------|-----------------|------------------------------|--------------------------------------------|-------------|
| P63000    | Ras-related C3 botulinum toxin substrate 1 OS=Homo sapiens OX=9606 GN=RAC1 PE=1 SV=1                   | 32           | 167  | 3                 | 1.79E+07         | 1.57E+07         | 2.01E+07         | 1.65E+07         | 2.04E+07         | 2.06E+07         | 1.59E+07  | 1.37E+07  | 1.34E+07  | 2.28E+07  | 1.93E+07  | 1.74E+07  | 1.85E+07               | 1.74E+07        | 1.02                         | 0.42026623                                 | 0.27        |
| P62841    | 40S ribosomal protein S15 OS=Homo sapiens OX=9606 GN=RPS15 PE=1 SV=2                                   | 47           | 26   | 3                 | 3.27E+06         | 5.01E+06         | 8.01E+06         | 7.10E+06         | 1.06E+07         | 6.31E+06         | 1.46E+06  | 2.96E+06  | 1.61E+06  | 1.78E+06  | 1.79E+06  | 6.71E+06  | 2.01E+07               | 3.30            | 0.005324168                  | 1.72                                       | 0.005324168 |
| Q15404    | Ras suppressor protein 1 OS=Homo sapiens OX=9606 GN=RSU1 PE=1 SV=3                                     | 18           | 24   | 3                 | 7.41E+06         | 4.48E+06         | 4.98E+06         | 4.55E+06         | 5.36E+06         | 7.44E+06         | 1.04E+07  | 6.71E+06  | 5.89E+06  | 5.43E+06  | 6.33E+06  | 8.81E+06  | 5.70E+06               | 7.09E+06        | 0.80                         | 0.20287752                                 | 0.80        |
| P31949    | Protein S100-A11 OS=Homo sapiens OX=9606 GN=S100A11 PE=1 SV=2                                          | 54           | 29   | 3                 | 8.61E+06         | 1.14E+07         | 9.65E+06         | 1.50E+07         | 1.41E+07         | 1.15E+07         | 7.54E+06  | 6.68E+06  | 7.26E+06  | 6.10E+06  | 6.39E+06  | 5.01E+06  | 1.17E+07               | 6.50E+06        | -0.31                        | 0.026676145                                | 1.80        |
| P40495    | Winged GTP-binding protein RhoG OS=Homo sapiens OX=9606 GN=RHOG PE=1 SV=1                              | 24           | 33   | 3                 | 4.73E+06         | 5.01E+06         | 3.07E+06         | 2.99E+06         | 3.57E+06         | 4.28E+06         | 3.83E+06  | 3.86E+06  | 3.58E+06  | 3.38E+06  | 2.18E+06  | 3.15E+06  | 3.94E+06               | 3.33E+06        | 1.18                         | 0.119194838                                | 0.24        |
| Q92323    | Cotomycin subunit 2 OS=Homo sapiens OX=9606 GN=COT2 PE=1 SV=1                                          | 9            | 9    | 3                 | 2.43E+06         | 2.29E+06         | 2.29E+06         | 2.29E+06         | 2.29E+06         | 6.19E+06         | 3.19E+06  | 3.19E+06  | 3.19E+06  | 3.19E+06  | 3.19E+06  | 3.19E+06  | 3.19E+06               | 3.19E+06        | 2.38                         | 0.001200033                                | 0.25        |
| Q92323    | Rho repeat-containing protein 61 OS=Homo sapiens OX=9606 GN=WRD61 PE=1 SV=1                            | 23           | 16   | 3                 | 2.14E+06         | 5.11E+06         | 2.03E+06         | 4.60E+06         | 3.37E+06         | 6.92E+06         | 2.87E+06  | 1.57E+06  | 2.31E+06  | 1.58E+06  | 4.04E+06  | 2.78E+06  | 1.03E+06               | 2.53E+06        | 0.67                         | 0.122966144                                | 0.24        |
| P15927    | Replication protein A 32 kDa subunit OS=Homo sapiens OX=9606 GN=RP2 PE=1 SV=1                          | 22           | 56   | 3                 | 1.06E+07         | 9.71E+06         | 9.30E+06         | 1.04E+07         | 9.73E+06         | 1.28E+07         | 1.02E+07  | 9.23E+06  | 6.87E+06  | 9.28E+06  | 1.10E+07  | 5.91E+06  | 1.04E+07               | 8.76E+06        | 1.19                         | 0.11767167                                 | 0.25        |
| P62330    | ADP-ribosylation factor 6 OS=Homo sapiens OX=9606 GN=ARF6 PE=1 SV=2                                    | 26           | 42   | 3                 | 2.15E+06         | 1.06E+07         | 7.30E+06         | 4.05E+06         | 7.36E+06         | 4.72E+06         | 8.07E+06  | 9.68E+06  | 7.09E+06  | 4.89E+06  | 1.00E+07  | 8.31E+06  | 6.03E+06               | 8.1E+06         | -0.43                        | 0.18488461                                 | 0.43        |
| Q87AQ2    | SWI/SNF complex subunit SMARCC2 OS=Homo sapiens OX=9606 GN=SMARCC2 PE=1 SV=1                           | 4            | 14   | 3                 | 4.48E+06         | 4.92E+06         | 5.77E+06         | 7.20E+06         | 4.67E+06         | 5.94E+06         | 2.73E+06  | 2.63E+06  | 2.21E+06  | 2.82E+06  | 3.00E+06  | 2.74E+06  | 6.00E+06               | 2.89E+06        | 2.23                         | 0.19691891                                 | 0.68        |
| P21810    | Blyssin OS=Homo sapiens OX=9606 GN=BLGN PE=1 SV=2                                                      | 13           | 34   | 3                 | 6.09E+06         | 5.35E+06         | 3.99E+06         | 5.36E+06         | 4.59E+06         | 6.28E+06         | 1.21E+07  | 5.59E+06  | 4.99E+06  | 8.88E+06  | 6.37E+06  | 7.98E+06  | 4.78E+06               | 7.88E+06        | 0.62                         | 0.038928016                                | 0.68        |
| Q92323    | Pol II RNA polymerase subunit 2 OS=Homo sapiens OX=9606 GN=POLR2B PE=1 SV=1                            | 12           | 31   | 3                 | 4.95E+06         | 4.79E+06         | 2.61E+06         | 2.61E+06         | 2.61E+06         | 3.12E+06         | 2.61E+06  | 2.61E+06  | 2.61E+06  | 2.61E+06  | 2.61E+06  | 2.61E+06  | 2.61E+06               | 2.61E+06        | 0.92                         | 0.001200033                                | 0.25        |
| P42285    | Exosome RNA helicase MTR4 OS=Homo sapiens OX=9606 GN=MTRX PE=1 SV=3                                    | 5            | 12   | 3                 | 3.09E+06         | 3.37E+06         | 4.06E+06         | 4.75E+06         | 5.08E+06         | 3.52E+06         | 1.65E+06  | 1.33E+06  | 1.20E+06  | 1.65E+06  | 6.84E+05  | 3.98E+06  | 1.30E+06               | 1.61            | 0.000117013                  | 1.00                                       | 0.000117013 |
| P21291    | Cysteine and glycine-rich protein 1 OS=Homo sapiens OX=9606 GN=CSR1 PE=1 SV=3                          | 25           | 62   | 3                 | 1.04E+07         | 9.40E+06         | 8.88E+06         | 7.95E+06         | 8.89E+06         | 9.35E+06         | 1.14E+07  | 9.83E+06  | 6.78E+06  | 9.81E+06  | 8.28E+06  | 8.63E+06  | 9.15E+06               | 9.01E+06        | 3.06                         | 0.060538045                                | 1.61        |
| P17858    | ATP-dependent 6-phosphofructokinase, liver type OS=Homo sapiens OX=9606 GN=PFKL PE=1 SV=6              | 9            | 49   | 3                 | 1.82E+07         | 1.79E+07         | 1.92E+07         | 1.88E+07         | 1.73E+07         | 1.68E+07         | 2.21E+07  | 2.23E+07  | 2.23E+07  | 2.20E+07  | 1.92E+07  | 1.73E+07  | 1.80E+07               | 2.09E+07        | 0.86                         | 0.020948453                                | 0.86        |
| P23270    | CD70 antigen OS=Homo sapiens OX=9606 GN=CD70 PE=1 SV=2                                                 | 20           | 30   | 3                 | 1.86E+07         | 1.13E+07         | 1.19E+07         | 1.16E+07         | 1.21E+07         | 1.14E+07         | 1.12E+07  | 8.49E+06  | 6.30E+06  | 5.81E+06  | 8.42E+06  | 9.84E+06  | 1.28E+07               | 8.34E+06        | 0.62                         | 0.01192165                                 | 0.62        |
| P62330    | Small nuclear ribonucleoprotein E OS=Homo sapiens OX=9606 GN=SNRPE PE=1 SV=1                           | 52           | 155  | 3                 | 2.05E+07         | 1.82E+07         | 1.41E+07         | 1.18E+07         | 1.39E+07         | 2.10E+07         | 1.32E+07  | 1.50E+07  | 1.21E+07  | 1.20E+07  | 1.17E+07  | 1.49E+07  | 1.66E+07               | 1.31E+07        | 1.26                         | 0.029490098                                | 0.94        |
| P42895    | Ethanol-converting enzyme 1 OS=Homo sapiens OX=9606 GN=ECE1 PE=1 SV=2                                  | 29           | 31   | 3                 | 5.52E+06         | 6.39E+06         | 6.98E+06         | 5.27E+06         | 6.74E+06         | 6.57E+06         | 6.50E+06  | 1.77E+06  | 2.15E+06  | 4.78E+06  | 1.90E+06  | 3.39E+06  | 3.39E+06               | 3.39E+06        | 1.68                         | 0.029490098                                | 0.94        |
| P08708    | 80S ribosomal protein S17 OS=Homo sapiens OX=9606 GN=RPS17 PE=1 SV=2                                   | 52           | 14   | 3                 | 1.13E+07         | 1.01E+07         | 7.76E+06         | 8.73E+06         | 9.87E+06         | 2.10E+07         | 6.05E+06  | 4.98E+06  | 3.76E+06  | 4.95E+06  | 5.07E+06  | 5.15E+06  | 9.46E+06               | 5.07E+06        | 1.87                         | 0.549057016                                | 0.30        |
| Q14828    | Secretory carrier-associated membrane protein 3 OS=Homo sapiens OX=9606 GN=SCAMP3 PE=1 SV=3            | 16           | 26   | 3                 | 9.22E+06         | 8.90E+06         | 6.67E+06         | 5.95E+06         | 5.74E+06         | 5.75E+06         | 6.17E+06  | 4.88E+06  | 3.37E+06  | 4.07E+06  | 3.78E+06  | 6.36E+05  | 7.05E+06               | 3.82E+06        | 1.85                         | 0.009062845                                | 0.86        |
| Q98715    | Collagen alpha-1(XII) chain OS=Homo sapiens OX=9606 GN=COL12A1 PE=1 SV=2                               | 2            | 18   | 3                 | 2.11E+06         | 2.87E+06         | 1.81E+06         | 1.95E+06         | 1.27E+06         | 1.85E+06         | 4.92E+06  | 1.88E+06  | 3.35E+06  | 4.07E+06  | 5.32E+06  | 4.21E+06  | 2.08E+06               | 4.0E+06         | 0.51                         | -0.97                                      | 0.010035328 |
| P54578    | Ubiquitin carboxyl-terminal hydrolase 14 OS=Homo sapiens OX=9606 GN=UHP14 PE=1 SV=3                    | 11           | 13   | 3                 | 8.00E+05         | 3.31E+06         | 4.02E+06         | 4.04E+06         | 4.04E+06         | 3.42E+06         | 4.46E+06  | 9.48E+05  | 2.06E+06  | 4.26E+06  | 3.44E+06  | 2.48E+06  | 3.41E+06               | 2.94E+06        | 1.14                         | 0.567349191                                | 1.14        |
| Q13443    | Disintegrin and metalloprotease domain-containing protein 9 OS=Homo sapiens OX=9606 GN=ADAM9 PE=1 SV=1 | 12           | 11   | 3                 | 4.87E+06         | 3.13E+06         | 4.14E+06         | 4.21E+06         | 5.26E+06         | 5.45E+06         | 1.78E+06  | 2.37E+06  | 1.52E+06  | 2.39E+06  | 1.23E+06  | 1.62E+06  | 4.82E+06               | 1.85E+06        | 2.61                         | 0.000866313                                | 0.80        |
| P48735    | Isostrate dehydrogenase [NADP], mitochondrial OS=Homo sapiens OX=9606 GN=IDH2 PE=1 SV=2                | 11           | 13   | 3                 | 8.07E+05         | 7.89E+05         | 6.83E+05         | 6.10E+05         | 7.08E+05         | 5.85E+05         | 6.74E+05  | 2.95E+06  | 3.15E+06  | 4.54E+06  | 3.15E+06  | 2.38E+06  | 3.76E+06               | 3.76E+06        | 1.74                         | 0.001774218                                | 1.74        |
| Q93627    | COP9 signalosome complex subunit 8 OS=Homo sapiens OX=9606 GN=COPS8 PE=1 SV=1                          | 28           | 18   | 3                 | 1.59E+06         | 1.82E+06         | 9.21E+05         | 9.16E+05         | 7.90E+05         | 1.01E+06         | 7.07E+05  | 6.01E+06  | 7.07E+05  | 6.01E+06  | 6.16E+05  | 5.87E+05  | 1.17E+06               | 6.62E+05        | 0.83                         | 0.030582485                                | 0.83        |
| Q86Y82    | Syntaxin-12 OS=Homo sapiens OX=9606 GN=STX12 PE=1 SV=1                                                 | 15           | 46   | 3                 | 7.71E+06         | 6.97E+06         | 8.61E+06         | 1.01E+07         | 8.83E+06         | 6.06E+06         | 5.94E+06  | 4.74E+06  | 6.24E+06  | 5.77E+06  | 4.26E+06  | 4.68E+06  | 8.05E+06               | 6.29E+05        | 1.52                         | 0.603781413                                | 1.52        |
| Q12906    | Interleukin enhancer-binding factor 3 OS=Homo sapiens OX=9606 GN=ILF3 PE=1 SV=3                        | 8            | 14   | 3                 | 4.27E+06         | 5.29E+06         | 6.83E+06         | 4.64E+06         | 5.31E+06         | 3.90E+06         | 2.77E+06  | 2.79E+06  | 2.01E+06  | 2.61E+06  | 2.40E+06  | 2.74E+06  | 5.04E+06               | 2.55E+06        | 1.97                         | 0.001455152                                | 1.97        |
| P14923    | Junctation plinkin OS=Homo sapiens OX=9606 GN=JUP PE=1 SV=1                                            | 10           | 39   | 3                 | 3.99E+06         | 5.24E+06         | 2.88E+06         | 3.26E+06         | 5.90E+06         | 3.71E+06         | 1.97E+06  | 5.34E+06  | 1.43E+06  | 3.03E+06  | 2.72E+06  | 2.13E+06  | 4.16E+06               | 2.77E+06        | 0.58                         | 0.089176842                                | 0.58        |
| P20748    | Complement component C9 OS=Homo sapiens OX=9606 GN=C9 PE=1 SV=1                                        | 10           | 132  | 3                 | 6.02E+06         | 6.17E+07         | 4.60E+07         | 5.40E+07         | 4.79E+07         | 4.82E+07         | 8.75E+07  | 6.38E+07  | 6.38E+07  | 6.38E+07  | 6.17E+07  | 6.05E+07  | 6.45E+07               | 6.45E+07        | 0.76                         | 0.032326044                                | 0.76        |
| Q13428    | Beta-2-syngrophin OS=Homo sapiens OX=9606 GN=SNTR2 PE=1 SV=1                                           | 18           | 18   | 3                 | 4.64E+06         | 4.10E+06         | 4.50E+06         | 4.50E+06         | 3.46E+06         | 4.02E+06         | 3.82E+06  | 2.69E+06  | 4.82E+06  | 2.69E+06  | 4.82E+06  | 2.69E+06  | 2.84E+06               | 2.84E+06        | 0.59                         | 0.049038988                                | 0.59        |
| P62318    | Small nuclear ribonucleoprotein Sm D3 OS=Homo sapiens OX=9606 GN=SNRPD3 PE=1 SV=1                      | 32           | 68   | 3                 | 3.72E+07         | 3.71E+07         | 3.50E+07         | 3.16E+07         | 4.61E+07         | 5.02E+07         | 2.68E+07  | 2.82E+07  | 2.68E+07  | 2.99E+07  | 2.18E+07  | 6.23E+07  | 3.92E+07               | 2.60E+07        | 1.51                         | 0.00469065                                 | 1.51        |
| P12821    | Angiotensin-converting enzyme OS=Homo sapiens OX=9606 GN=ACE PE=1 SV=1                                 | 2            | 20   | 3                 | 9.35E+06         | 8.17E+06         | 4.80E+06         | 8.74E+06         | 7.11E+06         | 6.21E+06         | 1.96E+06  | 7.56E+06  | 6.54E+06  | 6.35E+06  | 7.71E+06  | 5.37E+06  | 7.40E+06               | 7.12E+06        | 0.36                         | 0.000777776                                | 0.36        |
| P52788    | Spermine synthase OS=Homo sapiens OX=9606 GN=SMS PE=1 SV=2                                             | 20           | 10   | 3                 | 1.42E+06         | 1.07E+06         | 6.34E+05         | 1.06E+06         | 8.10E+05         | 1.64E+06         | 1.13E+06  | 5.48E+05  | 5.48E+05  | 5.48E+05  | 6.88E+05  | 6.52E+05  | 1.11E+06               | 8.49E+05        | 1.30                         | 0.354421139                                | 1.30        |
| P56537    | Eukaryotic translation initiation factor 6 OS=Homo sapiens OX=9606 GN=EIF6 PE=1 SV=1                   | 22           | 20   | 3                 | 1.09E+07         | 1.14E+07         | 7.61E+06         | 9.90E+06         | 8.97E+06         | 1.01E+07         | 8.15E+06  | 8.81E+06  | 8.57E+06  | 7.42E+06  | 8.71E+06  | 6.75E+06  | 9.82E+06               | 8.07E+06        | 1.22                         | 0.027317347                                | 1.22        |
| P20748    | 3-mercaptopyruvate sulfurtransferase OS=Homo sapiens OX=9606 GN=CSPT1 PE=1 SV=3                        | 21           | 33   | 3                 | 3.85E+06         | 8.40E+06         | 2.51E+06         | 3.48E+06         | 3.86E+06         | 5.10E+06         | 5.29E+06  | 4.91E+06  | 2.40E+06  | 5.09E+06  | 1.45E+06  | 4.96E+06  | 4.64E+06               | 4.45E+06        | 1.04                         | 0.841755611                                | 1.04        |
| P62070    | Ras-related protein R-Ras2 OS=Homo sapiens OX=9606 GN=RRAS2 PE=1 SV=1                                  | 21           | 56   | 3                 | 1.52E+07         | 1.58E+07         | 1.89E+07         | 1.71E+07         | 1.47E+07         | 1.48E+07         | 1.20E+07  | 1.18E+07  | 5.96E+06  | 1.33E+07  | 1.19E+07  | 8.65E+06  | 1.60E+07               | 1.06E+07        | 0.58                         | 0.004012113                                | 0.58        |
| P28066    | Proteasome subunit alpha type-5 OS=Homo sapiens OX=9606 GN=PSMA5 PE=1 SV=3                             | 17           | 48   | 3                 | 2.50E+07         | 2.49E+07         | 2.12E+07         | 2.53E+07         | 2.56E+07         | 7.09E+06         | 6.80E+06  | 7.02E+06  | 7.89E+06  | 6.72E+06  | 6.19E+06  | 5.17E+06  | 2.15E+07               | 6.63E+06        | 3.24                         | 0.1700379693                               | 3.24        |
| P28062    | Proteasome subunit beta type-8 OS=Homo sapiens OX=9606 GN=PSMB8 PE=1 SV=3                              | 13           | 36   | 3                 | 9.14E+06         | 7.92E+06         | 1.14E+07         | 1.03E+07         | 1.01E+07         | 9.85E+06         | 9.38E+06  | 8.91E+06  | 9.82E+06  | 8.68E+06  | 7.70E+06  | 9.77E+06  | 8.72E+06               | 1.16            | 0.104466351                  | 1.16                                       |             |
| Q15366    | Poly(O-C)-binding protein OS=Homo sapiens OX=9606 GN=PCBP2 PE=1 SV=1                                   | 1            | 38   | 3                 | 1.36E+07         | 1.16E+07         | 9.14E+06         | 9.14E+06         | 8.63E+06         | 9.61E+06         | 9.56E+06  | 5.60E+    |           |           |           |           |                        |                 |                              |                                            |             |

# Supplemental Table 4. List of all proteins identified by label free proteomics analysis.

| Accession | Description                                                                                                                                | Coverage [%] | iPSM# | # Unique Peptides | Antitrypticlyne 1 | Antitrypticlyne 2 | Antitrypticlyne 3 | Antitrypticlyne 4 | Antitrypticlyne 5 | Antitrypticlyne 6 | Vehicle 1 | Vehicle 2 | Vehicle 3 | Vehicle 4 | Vehicle 5 | Vehicle 6 | Average antitrypticlyne | Average vehicle | Ratio antitrypticlyne/vehicle | Log2 fold change (antitrypticlyne/vehicle) | P-value     |             |
|-----------|--------------------------------------------------------------------------------------------------------------------------------------------|--------------|-------|-------------------|-------------------|-------------------|-------------------|-------------------|-------------------|-------------------|-----------|-----------|-----------|-----------|-----------|-----------|-------------------------|-----------------|-------------------------------|--------------------------------------------|-------------|-------------|
| Q14117    | Dihydropyrimidinase OS=Homo sapiens OX=9606 GN=DPVYS PE=1 SV=1                                                                             | 6            | 40    | 3                 | 3.43E+06          | 4.63E+06          | 5.54E+06          | 6.17E+06          | 5.23E+06          | 4.08E+06          | 6.61E+06  | 6.97E+06  | 8.02E+06  | 8.69E+06  | 7.29E+06  | 5.87E+06  | 4.85E+06                | 7.24E+06        | 0.87                          | -0.58                                      | 0.00229304  |             |
| Q9NY12    | H/ACA ribonucleoprotein complex subunit 1 OS=Homo sapiens OX=9606 GN=GAR1 PE=1 SV=1                                                        | 16           | 30    | 3                 | 4.55E+06          | 2.57E+06          | 3.93E+06          | 3.39E+06          | 3.79E+06          | 4.76E+06          | 2.37E+06  | 3.31E+06  | 2.52E+06  | 3.14E+06  | 2.82E+06  | 2.05E+06  | 3.97E+06                | 2.70E+06        | 1.47                          | 0.56                                       | 0.008748343 |             |
| P49026    | Malate dehydrogenase, mitochondrial OS=Homo sapiens OX=9606 GN=MDH2 PE=1 SV=3                                                              | 3            | 25    | 3                 | 2.25E+06          | 9.30E+05          | 1.23E+06          | 1.56E+06          | 1.31E+06          | 1.33E+06          | 3.56E+06  | 7.83E+05  | 1.54E+06  | 1.15E+06  | 1.55E+06  | 1.44E+06  | 1.72E+06                | 1.44E+06        | 0.84                          | -0.26                                      | 0.609708468 |             |
| P78344    | Eukaryotic translation initiation factor 4 gamma 2 OS=Homo sapiens OX=9606 GN=EIF4G2 PE=1 SV=1                                             | 11           | 8     | 3                 | 1.11E+06          | 8.26E+05          | 1.50E+06          | 1.72E+05          | 9.79E+05          | 1.68E+06          | 6.40E+05  | 1.89E+06  | 2.91E+05  | 1.18E+06  | 6.40E+05  | 1.14E+06  | 9.28E+05                | 1.14E+06        | 1.23                          | 0.30                                       | 0.51971241  |             |
| P20042    | Eukaryotic translation initiation factor 2 subunit 2 OS=Homo sapiens OX=9606 GN=EIF2S2 PE=1 SV=2                                           | 9            | 22    | 3                 | 5.03E+06          | 4.03E+06          | 5.94E+06          | 7.06E+06          | 6.62E+06          | 5.32E+06          | 3.71E+06  | 3.81E+06  | 4.53E+06  | 3.86E+06  | 3.74E+06  | 3.78E+06  | 5.69E+06                | 3.91E+06        | 1.45                          | 0.54                                       | 0.009558287 |             |
| P20042    | ATPase, mitochondrial OS=Homo sapiens OX=9606 GN=ATP10 PE=1 SV=1                                                                           | 12           | 15    | 3                 | 4.32E+06          | 2.14E+06          | 4.58E+06          | 4.26E+06          | 6.23E+06          | 4.32E+06          | 1.85E+06  | 1.11E+06  | 1.53E+06  | 4.33E+06  | 2.35E+06  | 3.93E+06  | 1.56E+06                | 2.97E+06        | 1.27                          | 0.34                                       | 0.05671304  |             |
| P26196    | Probable ATP-dependent RNA helicase DDX2 OS=Homo sapiens OX=9606 GN=DDX2 PE=1 SV=2                                                         | 8            | 15    | 3                 | 3.22E+06          | 3.14E+06          | 2.29E+06          | 3.33E+06          | 1.83E+06          | 2.45E+06          | 2.27E+06  | 1.09E+06  | 6.47E+05  | 1.86E+06  | 1.60E+06  | 1.90E+06  | 2.72E+06                | 1.44E+06        | 1.89                          | 0.94                                       | 0.003851984 |             |
| Q9HC38    | Glyoxalase domain-containing protein 4 OS=Homo sapiens OX=9606 GN=GLOD4 PE=1 SV=1                                                          | 10           | 47    | 3                 | 9.93E+06          | 1.02E+07          | 1.11E+07          | 9.27E+06          | 9.46E+06          | 1.08E+07          | 1.32E+07  | 1.28E+07  | 1.33E+07  | 1.19E+07  | 1.37E+07  | 1.05E+07  | 1.01E+07                | 1.26E+07        | 0.80                          | -0.32                                      | 0.002170711 |             |
| P30044    | Peroxisome-anchored protein 1 OS=Homo sapiens OX=9606 GN=PRDX5 PE=1 SV=4                                                                   | 30           | 6     | 3                 | 1.33E+06          | 6.28E+05          | 3.22E+06          | 2.47E+06          | 9.15E+05          | 3.91E+06          |           |           |           | 1.03E+06  | 2.48E+05  | 2.08E+06  | 6.37E+05                | 1.71            | 0.37                          | 0.00873926                                 |             |             |
| Q13045    | Protein flightless-1 homolog OS=Homo sapiens OX=9606 GN=FLII PE=1 SV=2                                                                     | 3            | 26    | 3                 | 5.91E+06          | 3.77E+06          | 4.98E+06          | 5.44E+06          | 4.84E+06          | 2.18E+06          | 4.21E+06  | 3.45E+06  | 2.83E+06  | 4.22E+06  | 3.43E+06  | 2.74E+06  | 4.89E+06                | 3.48E+06        | 1.41                          | 0.49                                       | 0.003001446 |             |
| Q94444    | Cotasterone synthase OS=Homo sapiens OX=9606 GN=ACRNI PE=1 SV=1                                                                            | 10           | 30    | 3                 | 4.5E+06           | 3.70E+06          | 3.39E+06          | 3.58E+06          | 3.03E+06          | 4.8E+06           | 2.09E+06  | 2.04E+06  | 2.15E+06  | 2.59E+06  | 1.30E+06  | 8.04E+05  | 3.29E+06                | 1.78E+06        | 1.95                          | 0.89                                       | 0.002042845 |             |
| Q96039    | 60S ribosomal protein L24 OS=Homo sapiens OX=9606 GN=L24 PE=1 SV=1                                                                         | 16           | 52    | 3                 | 2.29E+07          | 2.14E+07          | 2.16E+07          | 2.21E+07          | 2.15E+07          | 2.06E+07          | 1.48E+07  | 1.48E+07  | 1.39E+07  | 1.55E+07  | 1.39E+07  | 1.22E+07  | 1.34E+07                | 1.34E+07        | 1.66                          | 0.17                                       | 0.562571061 |             |
| O00339    | Matrin-2 OS=Homo sapiens OX=9606 GN=MATN2 PE=1 SV=4                                                                                        | 5            | 13    | 3                 | 3.03E+06          |                   |                   |                   | 1.05E+06          |                   | 4.13E+06  | 1.56E+06  |           | 3.02E+06  | 1.19E+06  |           | 2.04E+06                | 1.82E+06        | 0.82                          | -0.22                                      | 0.751689207 |             |
| Q9NQW7    | Xaa-Pro aminopeptidase 1 OS=Homo sapiens OX=9606 GN=XPNPE1 PE=1 SV=3                                                                       | 5            | 32    | 3                 | 5.13E+06          | 5.81E+06          | 3.12E+06          | 3.59E+06          | 3.14E+06          | 7.20E+06          | 8.32E+06  | 7.01E+06  | 6.54E+06  | 6.08E+06  | 5.48E+06  | 4.12E+06  | 6.77E+06                | 6.77E+06        | -0.72                         | 0.01427047                                 | 0.000424264 |             |
| P62851    | 40S ribosomal protein S25 OS=Homo sapiens OX=9606 GN=RPS25 PE=1 SV=1                                                                       | 22           | 93    | 3                 | 5.64E+07          | 5.37E+07          | 6.71E+07          | 5.58E+07          | 7.96E+07          | 7.19E+07          | 4.00E+07  | 3.70E+07  | 4.91E+07  | 5.63E+07  | 4.21E+07  | 4.10E+07  | 6.41E+07                | 4.43E+07        | 1.45                          | 0.53                                       | 0.004167895 |             |
| Q14847    | LM and SH3 domain protein 1 OS=Homo sapiens OX=9606 GN=LASPI PE=1 SV=2                                                                     | 13           | 42    | 3                 | 5.68E+06          | 6.65E+06          | 6.00E+06          | 5.56E+06          | 5.79E+06          | 5.48E+06          | 3.40E+06  | 3.40E+06  | 4.39E+06  | 5.69E+06  | 3.31E+06  | 2.42E+06  | 5.86E+06                | 3.77E+06        | 0.63                          | -0.004726468                               | 0.000433346 |             |
| Q96039    | Elongation factor 3, mitochondrial OS=Homo sapiens OX=9606 GN=EFM3 PE=1 SV=2                                                               | 4            | 10    | 3                 | 3.10E+06          | 2.99E+06          | 2.11E+06          | 2.58E+06          | 2.25E+06          | 2.17E+06          | 1.77E+06  | 8.56E+05  | 1.32E+06  | 1.15E+06  | 1.46E+06  | 7.14E+05  | 2.53E+06                | 1.21E+06        | 1.06                          | 0.000433346                                | 0.000433346 |             |
| Q9Y377    | Endophilin B1 OS=Homo sapiens OX=9606 GN=SHCCLB1 PE=1 SV=1                                                                                 | 4            | 10    | 3                 | 1.53E+06          | 4.09E+06          | 4.09E+06          | 3.87E+06          | 3.40E+06          | 3.40E+06          | 3.63E+06  | 3.64E+06  | 3.52E+06  | 3.00E+06  | 2.84E+06  | 3.35E+06  | 3.35E+06                | 3.35E+06        | 1.00                          | 0.00                                       | 0.985668439 |             |
| P49002    | Cytosolic purine 5'-nucleotidase OS=Homo sapiens OX=9606 GN=N5C2 PE=1 SV=1                                                                 | 8            | 5     | 3                 | 1.33E+06          | 5.91E+05          | 6.87E+05          | 6.10E+05          | 2.89E+05          | 6.17E+05          | 1.27E+06  | 1.08E+06  | 1.08E+06  | 1.47E+06  | 6.84E+05  | 8.30E+05  | 8.88E+05                | 8.88E+05        | -0.07                         | -0.82136733                                | 0.000433346 |             |
| P18885    | 1-phosphatidylinositol 4,5-bisphosphate phosphodiesterase gamma-2 OS=Homo sapiens OX=9606 GN=PLCG2 PE=1 SV=4                               | 3            | 14    | 3                 | 2.60E+06          | 2.35E+06          | 2.25E+06          | 1.75E+06          | 1.82E+06          | 2.63E+06          | 3.10E+06  | 3.38E+06  | 4.39E+06  | 3.84E+06  | 2.75E+06  | 2.64E+06  | 2.23E+06                | 3.36E+06        | 0.67                          | -0.59                                      | 0.00746715  |             |
| P05198    | Eukaryotic translation initiation factor 2 subunit 1 OS=Homo sapiens OX=9606 GN=EIF2S1 PE=1 SV=3                                           | 9            | 62    | 3                 | 1.57E+07          | 1.64E+07          | 1.48E+07          | 1.58E+07          | 1.60E+07          | 1.46E+07          | 1.58E+07  | 1.49E+07  | 1.55E+07  | 1.41E+07  | 1.16E+07  | 1.56E+07  | 1.56E+07                | 1.44E+07        | 0.11                          | -0.134565866                               | 0.000433346 |             |
| P27701    | CD82 double-strand break repair protein OS=Homo sapiens OX=9606 GN=CD82 PE=1 SV=1                                                          | 15           | 18    | 3                 | 3.48E+06          | 2.75E+06          | 4.50E+06          | 9.13E+06          | 4.64E+06          | 3.87E+06          | 2.62E+06  | 6.00E+06  | 8.98E+06  | 6.31E+06  | 4.27E+06  | 4.88E+06  | 4.95E+06                | 5.51E+06        | 0.90                          | -0.16                                      | 0.670793977 |             |
| P49659    | Double-strand break repair protein NRE111 OS=Homo sapiens OX=9606 GN=NRE111 PE=1 SV=3                                                      | 6            | 10    | 3                 | 1.05E+06          | 1.15E+06          | 1.43E+06          | 1.08E+06          | 1.08E+06          | 1.10E+06          | 1.10E+06  | 1.10E+06  | 1.10E+06  | 1.10E+06  | 1.10E+06  | 1.10E+06  | 1.10E+06                | 1.10E+06        | 1.10E+06                      | 0.64                                       | 0.015661392 | 0.000433346 |
| P14324    | Farnesyl pyrophosphate transferase OS=Homo sapiens OX=9606 GN=FPDS PE=1 SV=1                                                               | 6            | 5     | 3                 | 5.44E+06          | 6.80E+06          | 5.81E+06          | 5.70E+06          | 1.01E+06          | 1.44E+06          | 2.21E+06  | 1.65E+06  | 7.02E+05  | 1.65E+06  | 3.20E+06  | 5.94E+06  | 1.38E+06                | 1.24E+06        | 1.12                          | 0.000433346                                | 0.000433346 |             |
| Q6QNZ2    | Cavolae-associated protein 1 OS=Homo sapiens OX=9606 GN=CAVIN1 PE=1 SV=1                                                                   | 8            | 26    | 3                 | 5.89E+06          | 6.94E+06          | 8.46E+06          | 8.54E+06          | 8.49E+06          | 6.84E+06          | 3.24E+06  | 2.50E+06  | 2.18E+06  | 2.57E+06  | 2.25E+06  | 1.95E+06  | 6.73E+06                | 7.53E+06        | 3.09                          | 0.63                                       | 2.60723E+05 |             |
| Q6O264    | SWI/SNF-related matrix-associated actin-dependent regulator of chromatin subfamily A member 5 OS=Homo sapiens OX=9606 GN=SMARCA5 PE=1 SV=1 | 3            | 17    | 3                 | 4.11E+06          | 4.77E+06          | 3.77E+06          | 4.28E+06          | 3.75E+06          | 3.72E+06          | 1.78E+06  | 2.12E+06  | 1.49E+06  | 2.06E+06  | 2.28E+06  | 2.20E+06  | 4.07E+06                | 1.99E+06        | 1.03                          | 1.03                                       | 3.27802E+05 |             |
| Q7S116    | Rho-associated protein kinase 2 OS=Homo sapiens OX=9606 GN=ROCK2 PE=1 SV=4                                                                 | 3            | 7     | 3                 | 7.20E+05          | 9.83E+05          | 1.19E+06          | 9.49E+05          | 4.24E+05          | 1.92E+06          | 2.33E+06  | 1.43E+06  | 1.82E+06  | 1.74E+06  | 1.54E+06  | 1.57E+06  | 1.03E+06                | 1.74E+06        | 0.59                          | -0.71                                      | 0.18981965  |             |
| Q15057    | Arg-GAP with coiled-coil, ANK repeat and PH domain-containing protein 2 OS=Homo sapiens OX=9606 GN=ACAP2 PE=1 SV=3                         | 6            | 23    | 3                 | 3.98E+06          | 7.92E+06          | 1.13E+07          | 1.85E+07          | 1.19E+07          | 9.56E+06          | 9.70E+06  | 8.77E+06  | 7.41E+06  | 3.37E+06  | 3.39E+06  | 5.91E+06  | 1.05E+07                | 6.42E+06        | 0.75                          | -0.07                                      | 0.108354226 |             |
| P23831    | Tryptophan-tRNA ligase, cytosolic OS=Homo sapiens OX=9606 GN=TWARS PE=1 SV=2                                                               | 18           | 58    | 3                 | 1.76E+06          | 1.76E+06          | 1.93E+06          | 1.43E+06          | 1.56E+06          | 1.27E+06          | 3.65E+06  | 1.43E+06  | 1.37E+06  | 6.82E+06  | 6.82E+06  | 4.70E+06  | 1.50E+06                | 1.50E+06        | 1.16                          | 0.000433346                                | 0.000433346 |             |
| Q95445    | Apolipoprotein M OS=Homo sapiens OX=9606 GN=APOM1 PE=1 SV=2                                                                                | 18           | 58    | 3                 | 4.67E+07          | 4.75E+07          | 4.75E+07          | 4.04E+07          | 4.82E+07          | 3.66E+07          | 6.34E+07  | 6.73E+07  | 5.99E+07  | 4.70E+07  | 4.70E+07  | 4.70E+07  | 4.70E+07                | 4.70E+07        | 0.84                          | 0.004202983                                | 0.000433346 |             |
| P10643    | Complement component C7 OS=Homo sapiens OX=9606 GN=C7 PE=1 SV=2                                                                            | 2            | 66    | 3                 | 2.89E+07          | 2.55E+07          | 1.75E+07          | 2.02E+07          | 1.89E+07          | 2.26E+07          | 3.47E+07  | 4.28E+07  | 2.49E+07  | 2.49E+07  | 2.22E+07  | 2.71E+07  | 2.22E+07                | 2.71E+07        | 0.32                          | -0.42                                      | 0.066148483 |             |
| Q10474    | Protein arginine N-methyltransferase 5 OS=Homo sapiens OX=9606 GN=PRMT5 PE=1 SV=4                                                          | 5            | 20    | 3                 | 7.49E+06          | 1.01E+07          | 8.38E+06          | 8.59E+06          | 8.66E+06          | 5.17E+06          | 9.24E+06  | 2.00E+06  | 1.51E+06  | 1.03E+06  | 7.46E+06  | 1.82E+06  | 7.89E+06                | 5.21E+06        | 0.60                          | -0.20                                      | 2.01352765  |             |
| P06132    | Uroporphyrinogen decarboxylase OS=Homo sapiens OX=9606 GN=UROD PE=1 SV=2                                                                   | 9            | 34    | 3                 | 7.46E+06          | 6.25E+06          | 5.11E+06          | 3.84E+06          | 6.43E+06          | 2.66E+06          | 7.14E+06  | 7.85E+06  | 3.98E+06  | 6.87E+06  | 7.15E+06  | 5.76E+06  | 6.79E+06                | 6.79E+06        | -0.24                         | -0.21858482                                | 0.000433346 |             |
| P23229    | Integrin alpha-8 OS=Homo sapiens OX=9606 GN=ITGA8 PE=1 SV=5                                                                                | 3            | 12    | 3                 | 3.92E+05          | 6.07E+06          | 6.50E+06          | 7.27E+06          | 6.50E+06          | 1.11E+06          | 4.19E+06  | 6.23E+06  | 7.28E+06  | 5.38E+06  | 8.45E+06  | 6.61E+06  | 6.30E+06                | 1.05            | 0.07                          | 0.17171384                                 |             |             |
| Q96039    | Hemoglobin beta OS=Homo sapiens OX=9606 GN=HBGB PE=1 SV=3                                                                                  | 5            | 47    | 3                 | 3.92E+05          | 1.42E+06          | 2.18E+06          | 1.42E+06          | 1.42E+06          | 1.11E+06          | 4.19E+06  | 7.58E+06  | 6.23E+06  | 7.28E+06  | 5.38E+06  | 8.45E+06  | 6.61E+06                | 6.30E+06        | 1.05                          | 0.07                                       | 0.17171384  |             |
| Q96039    | Immunoglobulin superfamily member 8 OS=Homo sapiens OX=9606 GN=IGSF8 PE=1 SV=1                                                             | 5            | 23    | 3                 | 3.35E+06          | 2.72E+06          | 4.16E+06          | 4.29E+06          | 3.81E+06          | 2.21E+06          | 2.14E+06  | 2.03E+06  | 2.14E+06  | 2.16E+06  | 1.83E+06  | 3.66E+06  | 2.08E+06                | 1.76            | 0.82                          | 0.000820177                                |             |             |
| Q00059    | Transcription factor A, mitochondrial OS=Homo sapiens OX=9606 GN=TFAM PE=1 SV=1                                                            | 3            | 12    | 3                 | 7.65E+06          | 8.65E+06          | 8.05E+06          | 9.73E+06          | 8.79E+06          | 7.88E+06          | 3.69E+06  | 7.24E+06  | 7.11E+06  | 6.92E+06  | 3.76E+06  | 6.09E+06  | 8.46E+06                | 5.80E+06        | 1.46                          | 0.54                                       | 0.00907494  |             |
| P18077    | 60S ribosomal protein L35a OS=Homo sapiens OX=9606 GN=L35A PE=1 SV=2                                                                       | 22           | 73    | 3                 | 1.62E+07          | 1.57E+07          | 1.60E+07          | 1.64E+07          | 1.63E+07          | 1.59E+07          | 1.46E+07  | 1.51E+07  | 1.59E+07  | 1.43E+07  | 1.35E+07  | 1.14E+07  | 1.64E+07                | 1.41E+07        | 0.21                          | -0.015389441                               | 0.000433346 |             |
| Q9Y978    | Bisphosphoglycerate kinase OS=Homo sapiens OX=9606 GN=AC02 PE=1 SV=2                                                                       | 4            | 14    | 3                 | 1.55E+06          | 1.89E+06          | 2.20E+06          | 1.45E+06          | 1.65E+06          | 2.29E+06          | 1.48E+06  | 1.54E+06  | 2.02E+06  |           |           |           |                         |                 |                               |                                            |             |             |

**Supplemental Table 4. List of all proteins identified by label free proteomics analysis.**

| Accession | Description                                                                                                                    | Coverage [%] | # PSMs | # Unique Peptides | Antitriptyline 1 | Antitriptyline 2 | Antitriptyline 3 | Antitriptyline 4 | Antitriptyline 5 | Antitriptyline 6 | Vehicle 1 | Vehicle 2 | Vehicle 3 | Vehicle 4 | Vehicle 5 | Vehicle 6 | Average antitriptyline | Average vehicle | Ratio antitriptyline/vehicle | Log 2 fold change (antitriptyline/vehicle) | P-value     |
|-----------|--------------------------------------------------------------------------------------------------------------------------------|--------------|--------|-------------------|------------------|------------------|------------------|------------------|------------------|------------------|-----------|-----------|-----------|-----------|-----------|-----------|------------------------|-----------------|------------------------------|--------------------------------------------|-------------|
| Q9BXJ4    | Complement C1q tumor necrosis factor-related protein 3 OS=Homo sapiens OX=9606 GN=C10TNF3 PE=1 Sv=1                            | 13           | 74     | 4                 | 2.71E+07         | 2.37E+07         | 2.01E+07         | 2.30E+07         | 2.01E+07         | 1.75E+07         | 3.27E+07  | 2.61E+07  | 2.44E+07  | 2.18E+07  | 1.86E+07  | 1.76E+07  | 2.19E+07               | 2.35E+07        | 1.07                         | -0.10                                      | 0.55721439  |
| Q92542    | Nicastrin OS=Homo sapiens OX=9606 GN=NCSTN PE=1 Sv=2                                                                           | 10           | 10     | 4                 | 6.13E+06         | 4.68E+06         | 4.07E+06         | 4.39E+06         | 5.85E+06         | 5.45E+06         | 1.24E+06  | 1.39E+06  | 1.33E+06  | 2.15E+06  | 1.36E+06  | 1.84E+06  | 5.09E+06               | 3.50E+06        | 1.45                         | 1.72                                       | 3.50612E-05 |
| P00738    | Hypatoglobulin OS=Homo sapiens OX=9606 GN=HP PE=1 Sv=1                                                                         | 10           | 91     | 4                 | 3.01E+07         | 2.98E+07         | 2.57E+07         | 2.76E+07         | 2.37E+07         | 1.92E+07         | 3.19E+07  | 2.94E+07  | 2.66E+07  | 3.06E+07  | 2.07E+07  | 1.82E+07  | 2.60E+07               | 2.61E+07        | 1.00                         | 0.00                                       | 0.98936982  |
| Q13409    | Cytoplasmic dynein 1 intermediate chain 2 OS=Homo sapiens OX=9606 GN=DYNC1I2 PE=1 Sv=3                                         | 12           | 12     | 4                 | 3.06E+06         | 5.11E+06         | 3.45E+06         | 2.03E+06         | 2.03E+06         | 4.08E+06         | 1.14E+06  | 1.86E+06  | 1.60E+06  | 1.60E+06  | 3.79E+06  | 2.48E+06  | 3.29E+06               | 2.23E+06        | 1.48                         | 0.56                                       | 0.13668438  |
| P16070    | CD44 antigen OS=Homo sapiens OX=9606 GN=CD44 PE=1 Sv=3                                                                         | 6            | 142    | 4                 | 4.09E+07         | 4.02E+07         | 3.89E+07         | 4.50E+07         | 4.18E+07         | 4.84E+07         | 2.12E+07  | 2.21E+07  | 2.06E+07  | 2.06E+07  | 1.83E+07  | 1.65E+07  | 4.22E+07               | 1.99E+07        | 2.12                         | 1.09                                       | 8.6851E-08  |
| Q92542    | Acyl-CoA oxidase 1 OS=Homo sapiens OX=9606 GN=ACO1 PE=1 Sv=1                                                                   | 54           | 54     | 4                 | 1.95E+07         | 1.95E+07         | 1.95E+07         | 1.95E+07         | 1.95E+07         | 1.95E+07         | 1.95E+07  | 1.95E+07  | 1.95E+07  | 1.95E+07  | 1.95E+07  | 1.95E+07  | 1.95E+07               | 1.95E+07        | 1.00                         | 0.00                                       | 1.00000000  |
| P28022    | Transmembrane protein PTX3 OS=Homo sapiens OX=9606 GN=PTX3 PE=1 Sv=3                                                           | 14           | 28     | 4                 | 1.67E+06         | 1.19E+06         | 1.48E+06         | 1.35E+06         | 1.65E+06         | 3.47E+06         | 9.21E+06  | 1.07E+06  | 5.79E+06  | 7.29E+06  | 7.29E+06  | 7.29E+06  | 1.64E+06               | 4.22E+06        | 0.21                         | -2.28                                      | 6.25913E-05 |
| Q98005    | Transmembrane 9 superfamily member 2 OS=Homo sapiens OX=9606 GN=TM9SF2 PE=1 Sv=1                                               | 9            | 48     | 4                 | 8.56E+06         | 7.88E+06         | 8.28E+06         | 8.04E+06         | 7.52E+06         | 8.88E+06         | 6.05E+06  | 6.04E+06  | 4.48E+06  | 5.49E+06  | 5.60E+06  | 4.17E+06  | 8.14E+06               | 5.30E+06        | 1.54                         | 0.62                                       | 7.88823E-05 |
| Q00577    | Transcriptional activator protein Pur-alpha OS=Homo sapiens OX=9606 GN=PURA PE=1 Sv=2                                          | 25           | 22     | 4                 | 1.05E+07         | 1.09E+07         | 5.85E+06         | 5.95E+06         | 6.16E+06         | 7.87E+06         | 4.94E+06  | 8.84E+06  | 5.97E+06  | 5.55E+06  | 6.46E+06  | 5.28E+06  | 7.87E+06               | 5.00E+06        | 1.54                         | 0.62                                       | 0.82657978  |
| Q92522    | Histone H1x OS=Homo sapiens OX=9606 GN=H1FX PE=1 Sv=1                                                                          | 16           | 114    | 4                 | 5.90E+07         | 5.80E+07         | 5.83E+07         | 4.88E+07         | 4.63E+07         | 4.92E+07         | 4.97E+07  | 5.09E+07  | 4.75E+07  | 4.23E+07  | 4.02E+07  | 3.82E+07  | 5.23E+07               | 4.48E+07        | 1.17                         | 0.22                                       | 0.29697859  |
| Q13085    | Acetyl-CoA carboxylase 1 OS=Homo sapiens OX=9606 GN=ACCAC1 PE=1 Sv=2                                                           | 3            | 23     | 4                 | 4.32E+06         | 5.51E+06         | 6.90E+06         | 5.10E+06         | 6.78E+06         | 4.51E+06         | 5.29E+06  | 5.87E+06  | 5.36E+06  | 6.02E+06  | 6.61E+06  | 5.10E+06  | 5.62E+06               | 4.50E+06        | 0.99                         | 0.02                                       | 0.86745494  |
| Q92542    | Proteasome activator complex subunit 3 OS=Homo sapiens OX=9606 GN=PA3 PE=1 Sv=1                                                | 1            | 3      | 4                 | 1.49E+07         | 1.49E+07         | 1.49E+07         | 1.49E+07         | 1.49E+07         | 1.49E+07         | 1.49E+07  | 1.49E+07  | 1.49E+07  | 1.49E+07  | 1.49E+07  | 1.49E+07  | 1.49E+07               | 1.49E+07        | 1.00                         | 0.00                                       | 0.00000000  |
| P06632    | Calpain small subunit 1 OS=Homo sapiens OX=9606 GN=CAPNS1 PE=1 Sv=1                                                            | 20           | 72     | 4                 | 8.09E+06         | 6.43E+06         | 7.89E+06         | 7.54E+06         | 7.83E+06         | 7.12E+06         | 5.44E+06  | 4.11E+06  | 4.42E+06  | 5.24E+06  | 5.50E+06  | 4.33E+06  | 7.48E+06               | 4.84E+06        | 1.55                         | 0.63                                       | 2.26971E-05 |
| Q722W4    | Zinc finger CCHC-type antiviral protein 1 OS=Homo sapiens OX=9606 GN=ZC3H4V1 PE=1 Sv=3                                         | 6            | 42     | 4                 | 7.89E+06         | 8.72E+06         | 7.96E+06         | 9.03E+06         | 8.36E+06         | 3.96E+06         | 3.87E+06  | 4.57E+06  | 4.65E+06  | 4.58E+06  | 4.44E+06  | 8.22E+06  | 5.34E+06               | 0.95            | 2.32                         | 2.322E-07                                  |             |
| Q8NE71    | ATP-binding cassette sub-family F member 1 OS=Homo sapiens OX=9606 GN=ABCF1 PE=1 Sv=2                                          | 8            | 20     | 4                 | 4.76E+06         | 3.93E+06         | 5.03E+06         | 6.96E+06         | 5.55E+06         | 5.82E+06         | 3.85E+06  | 1.87E+06  | 3.64E+06  | 3.15E+06  | 4.97E+06  | 1.70E+06  | 5.34E+06               | 2.45E+06        | 2.18                         | 1.12                                       | 0.01916005  |
| P28288    | 60S ribosomal protein L30 OS=Homo sapiens OX=9606 GN=RPL30 PE=1 Sv=2                                                           | 51           | 62     | 4                 | 1.83E+07         | 1.70E+07         | 1.40E+07         | 1.46E+07         | 1.72E+07         | 1.37E+07         | 1.37E+07  | 1.35E+07  | 8.98E+06  | 1.18E+07  | 1.13E+07  | 9.87E+06  | 1.60E+07               | 1.15E+07        | 1.39                         | 0.47                                       | 0.01729187  |
| Q92542    | Signal transducer and activator of transcription 3 OS=Homo sapiens OX=9606 GN=STAT3 PE=1 Sv=2                                  | 4            | 34     | 4                 | 4.89E+06         | 6.78E+06         | 5.04E+06         | 5.30E+06         | 5.42E+06         | 4.39E+06         | 5.28E+06  | 7.17E+06  | 5.89E+06  | 6.80E+06  | 5.99E+06  | 5.98E+06  | 5.30E+06               | 6.28E+06        | 0.84                         | 0.04                                       | 0.33777029  |
| Q92542    | Ubiquitin thioesterase OTUB1 OS=Homo sapiens OX=9606 GN=OTUB1 PE=1 Sv=1                                                        | 19           | 24     | 4                 | 7.77E+06         | 7.05E+06         | 1.01E+07         | 7.77E+06         | 7.81E+06         | 7.74E+06         | 8.51E+06  | 9.36E+06  | 9.85E+06  | 7.94E+06  | 7.69E+06  | 7.05E+06  | 8.10E+06               | 8.75E+06        | 1.02                         | 0.03                                       | 0.80251402  |
| Q12905    | Interleukin enhancer-binding factor 2 OS=Homo sapiens OX=9606 GN=ILF2 PE=1 Sv=1                                                | 15           | 42     | 4                 | 9.74E+06         | 9.56E+06         | 5.10E+06         | 1.07E+07         | 7.77E+06         | 4.31E+06         | 1.26E+06  | 9.84E+06  | 9.95E+06  | 5.79E+06  | 1.09E+07  | 6.83E+06  | 9.81E+06               | 9.62E+06        | 1.02                         | 0.02                                       | 0.87496593  |
| Q75340    | Programmed cell death protein 6 OS=Homo sapiens OX=9606 GN=PDCC6 PE=1 Sv=1                                                     | 31           | 84     | 4                 | 2.20E+07         | 2.25E+07         | 2.36E+07         | 1.97E+07         | 1.96E+07         | 1.77E+07         | 1.48E+07  | 1.55E+07  | 1.21E+07  | 1.40E+07  | 1.22E+07  | 2.05E+07  | 2.08E+07               | 1.48E+07        | 1.00                         | 0.49                                       | 0.003738271 |
| Q95834    | Echinoderm microtubule-associated protein-like 2 OS=Homo sapiens OX=9606 GN=EML2 PE=1 Sv=1                                     | 9            | 36     | 4                 | 7.87E+06         | 8.61E+06         | 7.93E+06         | 6.34E+06         | 5.89E+06         | 6.77E+06         | 1.04E+07  | 7.77E+06  | 7.49E+06  | 7.60E+06  | 7.94E+06  | 7.24E+06  | 8.53E+06               | 5.30E+06        | 0.85                         | -0.24                                      | 0.009156155 |
| P28213    | 60S ribosomal protein L11 OS=Homo sapiens OX=9606 GN=RPL11 PE=1 Sv=2                                                           | 31           | 82     | 4                 | 1.72E+07         | 1.78E+07         | 1.51E+07         | 1.36E+07         | 1.66E+07         | 1.33E+07         | 1.57E+07  | 1.50E+07  | 1.37E+07  | 1.35E+07  | 1.75E+07  | 1.37E+07  | 1.56E+07               | 1.57E+07        | 1.00                         | 0.91                                       | 0.21240929  |
| Q92542    | Mannose-1-phosphate guanylyltransferase beta OS=Homo sapiens OX=9606 GN=MGPPB PE=1 Sv=2                                        | 17           | 30     | 4                 | 3.80E+06         | 4.75E+06         | 4.91E+06         | 3.60E+06         | 3.20E+06         | 3.75E+06         | 5.02E+06  | 5.78E+06  | 4.11E+06  | 6.92E+06  | 4.21E+06  | 3.37E+06  | 4.03E+06               | 4.80E+06        | 0.82                         | 0.01                                       | 1.75644666  |
| Q92542    | GTP-binding protein SAR1a OS=Homo sapiens OX=9606 GN=SAR1A PE=1 Sv=1                                                           | 1            | 3      | 4                 | 1.45E+07         | 1.45E+07         | 1.45E+07         | 1.45E+07         | 1.45E+07         | 1.45E+07         | 1.45E+07  | 1.45E+07  | 1.45E+07  | 1.45E+07  | 1.45E+07  | 1.45E+07  | 1.45E+07               | 1.45E+07        | 1.00                         | 0.00                                       | 0.00000000  |
| Q14950    | Myosin regulatory light chain 12B OS=Homo sapiens OX=9606 GN=MYL12B PE=1 Sv=2                                                  | 29           | 65     | 4                 | 2.18E+07         | 2.16E+07         | 2.18E+07         | 2.51E+07         | 2.14E+07         | 2.17E+07         | 2.15E+07  | 2.20E+07  | 2.21E+07  | 1.94E+07  | 1.84E+07  | 1.67E+07  | 2.22E+07               | 2.00E+07        | 1.11                         | 0.15                                       | 0.68985072  |
| P28072    | Proteasome subunit beta type-6 OS=Homo sapiens OX=9606 GN=PSMB6 PE=1 Sv=4                                                      | 29           | 74     | 4                 | 2.83E+07         | 1.50E+07         | 1.33E+07         | 1.20E+07         | 1.37E+07         | 1.75E+07         | 2.40E+07  | 2.28E+07  | 2.46E+07  | 2.00E+07  | 1.76E+07  | 1.29E+07  | 1.55E+07               | 1.22E+07        | 0.37                         | -0.03                                      | 0.09320352  |
| Q17866    | KH domain-containing, RNA-binding, signal transduction-associated protein 1 OS=Homo sapiens OX=9606 GN=KHDRBS1 PE=1 Sv=1       | 12           | 30     | 4                 | 5.23E+06         | 1.23E+07         | 1.18E+07         | 1.27E+07         | 1.02E+07         | 1.16E+07         | 8.84E+06  | 8.75E+06  | 8.21E+06  | 8.68E+06  | 6.70E+06  | 7.06E+06  | 5.18E+06               | 8.10E+06        | 1.46                         | 0.58                                       | 2.42897E-05 |
| Q92542    | 60S ribosomal protein L10 OS=Homo sapiens OX=9606 GN=RPL10 PE=1 Sv=2                                                           | 11           | 45     | 4                 | 1.23E+06         | 1.06E+06         | 5.19E+06         | 4.57E+06         | 4.57E+06         | 3.87E+06         | 9.21E+06  | 6.96E+06  | 7.72E+06  | 9.40E+06  | 6.51E+06  | 9.72E+06  | 5.61E+06               | 8.25E+06        | 0.68                         | -0.56                                      | 0.54828114  |
| Q92542    | Complement C3 subcomponent subunit B OS=Homo sapiens OX=9606 GN=C1QB PE=1 Sv=1                                                 | 4            | 16     | 4                 | 9.15E+06         | 9.34E+06         | 6.46E+06         | 6.56E+06         | 9.15E+06         | 9.43E+06         | 8.47E+06  | 9.36E+06  | 9.36E+06  | 1.72E+06  | 2.27E+06  | 4.98E+06  | 1.08E+07               | 1.08E+07        | 1.00                         | -0.73                                      | 0.00566008  |
| Q13741    | CD161 antigen OS=Homo sapiens OX=9606 GN=CD161 PE=1 Sv=3                                                                       | 11           | 39     | 4                 | 2.82E+06         | 4.11E+06         | 2.82E+06         | 2.82E+06         | 2.82E+06         | 2.11E+06         | 2.11E+06  | 2.02E+06  | 2.02E+06  | 2.38E+06  | 2.38E+06  | 2.38E+06  | 3.00E+06               | 2.38E+06        | 1.20                         | 0.00                                       | 0.00053732  |
| Q92542    | Phenylalanyl-tRNA ligase alpha subunit OS=Homo sapiens OX=9606 GN=FASEA PE=1 Sv=3                                              | 23           | 28     | 4                 | 1.39E+07         | 1.68E+07         | 1.53E+07         | 1.57E+07         | 1.61E+07         | 1.53E+07         | 1.18E+07  | 1.20E+07  | 8.52E+06  | 1.25E+07  | 1.05E+07  | 1.06E+07  | 1.55E+07               | 1.10E+07        | 1.41                         | 1.00                                       | 0.000155366 |
| Q15427    | Monocarboxylate transporter 4 OS=Homo sapiens OX=9606 GN=SLC16A3 PE=1 Sv=1                                                     | 10           | 63     | 4                 | 1.25E+07         | 1.30E+07         | 1.28E+07         | 1.58E+07         | 1.56E+07         | 1.05E+07         | 9.39E+06  | 7.77E+06  | 1.10E+07  | 1.04E+07  | 8.47E+06  | 5.79E+06  | 1.34E+07               | 8.81E+06        | 1.52                         | 0.60                                       | 0.02350571  |
| P22570    | NADPH-dependent oxidoreductase, mitochondrial OS=Homo sapiens OX=9606 GN=FOXDR PE=1 Sv=3                                       | 12           | 50     | 4                 | 1.21E+07         | 7.90E+06         | 1.19E+07         | 1.19E+07         | 1.21E+07         | 1.63E+06         | 1.07E+06  | 1.08E+07  | 1.08E+07  | 8.30E+06  | 8.77E+06  | 4.87E+06  | 1.04E+07               | 6.91E+06        | 0.21                         | 0.33                                       | 0.33928786  |
| P62244    | 40S ribosomal protein S15a OS=Homo sapiens OX=9606 GN=RPS15A PE=1 Sv=2                                                         | 31           | 146    | 4                 | 5.17E+07         | 5.71E+07         | 7.44E+07         | 7.29E+07         | 7.60E+07         | 6.92E+07         | 4.27E+07  | 4.70E+07  | 5.73E+07  | 5.67E+07  | 5.55E+07  | 4.01E+07  | 6.69E+07               | 5.01E+07        | 1.34                         | 0.42                                       | 0.009914808 |
| Q92542    | DNA replication licensing factor OS=Homo sapiens OX=9606 GN=NLNKB PE=1 Sv=1                                                    | 9            | 48     | 4                 | 3.89E+06         | 3.09E+06         | 3.45E+06         | 3.92E+06         | 3.34E+06         | 3.12E+06         | 1.93E+06  | 1.93E+06  | 1.93E+06  | 1.93E+06  | 1.93E+06  | 1.93E+06  | 1.93E+06               | 1.93E+06        | 1.26                         | 0.36                                       | 0.00336696  |
| Q92542    | Transmembrane 9 superfamily member 3 OS=Homo sapiens OX=9606 GN=TM9SF3 PE=1 Sv=1                                               | 4            | 28     | 4                 | 5.08E+06         | 5.08E+06         | 6.56E+06         | 5.20E+06         | 6.47E+06         | 7.45E+06         | 4.77E+06  | 6.89E+06  | 4.83E+06  | 6.96E+06  | 5.14E+06  | 3.90E+06  | 6.01E+06               | 4.88E+06        | 1.23                         | 0.60                                       | 0.09930230  |
| P63151    | Serine/threonine-protein phosphatase 2A 55 kDa regulatory subunit B alpha isoform OS=Homo sapiens OX=9606 GN=PPP2R2A PE=1 Sv=1 | 13           | 34     | 4                 | 4.89E+06         | 4.59E+06         | 7.21E+06         | 7.90E+06         | 6.68E+06         | 8.53E+06         | 5.94E+06  | 4.81E+06  | 7.54E+06  | 6.18E+06  | 5.85E+06  | 4.81E+06  | 6.63E+06               | 5.86E+06        | 1.10                         | 0.18                                       | 0.343088155 |
| P29401    | Transketolase OS=Homo sapiens OX=9606 GN=TKT PE=1 Sv=3                                                                         | 9            | 52     | 4                 | 5.87E+06         | 5.77E+06         | 7.08E+06         | 5.03E+06         | 5.63E+06         | 4.09E+06         | 6.79E+06  | 5.49E+06  | 6.14E+06  | 6.42E+06  | 6.29E+06  | 6.94E+06  | 5.30E+06               | 6.10E+06        | 1.03                         | 0.07                                       | 0.796319818 |
| Q15691    | Microtubule-associated protein RP/EB family member 1 OS=Homo sapiens OX=9606 GN=MAPRE1 PE=1 Sv=3                               | 26           | 40     | 4                 | 9.57E+06         | 8.08E+06         | 9.56E+06         | 9.00E+06         | 9.62E+06         | 9.56E+06</       |           |           |           |           |           |           |                        |                 |                              |                                            |             |

Supplemental Table 4. List of all proteins identified by label free proteomics analysis.

| Accession | Description                                                                                                | Coverage [%] | # PSMs | # Unique Peptides | Antitryptic1 | Antitryptic2 | Antitryptic3 | Antitryptic4 | Antitryptic5 | Antitryptic6 | Vehicle 1 | Vehicle 2 | Vehicle 3 | Vehicle 4 | Vehicle 5 | Vehicle 6 | Average antitryptic | Average vehicle | Ratio antitryptic/vehicle | Log 2 fold change (antitryptic/vehicle) | P-value     |          |
|-----------|------------------------------------------------------------------------------------------------------------|--------------|--------|-------------------|--------------|--------------|--------------|--------------|--------------|--------------|-----------|-----------|-----------|-----------|-----------|-----------|---------------------|-----------------|---------------------------|-----------------------------------------|-------------|----------|
| P01834    | Immunoglobulin kappa constant OS=Homo sapiens OX=9066 GN=IGKC PE=1 Sv=1                                    | 79           | 15     | 5                 | 1.02E+06     |              |              |              |              |              | 4.22E+06  | 2.56E+05  |           |           | 3.65E+05  | 1.98E+07  | 1.02E+06            |                 | 6.18E+06                  | 0.16                                    | -2.80       |          |
| Q9Y240    | C-type lectin domain family 11 member A OS=Homo sapiens OX=9066 GN=CLEC11A PE=1 Sv=1                       | 15           | 261    | 5                 | 9.65E+07     | 8.48E+07     | 8.38E+07     | 8.63E+07     | 7.80E+07     | 7.39E+07     | 1.29E+08  | 1.10E+08  | 9.88E+07  | 1.02E+08  | 1.08E+07  | 8.28E+07  | 8.39E+07            | 1.02E+08        | 0.82                      | 0.02138225                              | -0.20       |          |
| Q02750    | Dual specificity mitogen-activated protein kinase kinase 1 OS=Homo sapiens OX=9066 GN=MAP2K1 PE=1 Sv=2     | 34           | 66     | 5                 | 1.61E+07     | 1.69E+07     | 1.90E+07     | 2.26E+07     | 1.75E+07     | 1.75E+07     | 1.37E+07  | 1.63E+07  | 1.32E+07  | 1.86E+07  | 1.39E+07  | 1.52E+07  | 1.83E+07            | 1.52E+07        | 1.20                      | 0.04360231                              | 0.27        |          |
| P13804    | Electron transfer flavoprotein subunit alpha, mitochondrial OS=Homo sapiens OX=9066 GN=ETFA PE=1 Sv=1      | 27           | 42     | 5                 | 7.63E+06     | 7.46E+06     | 1.04E+07     | 1.03E+07     | 7.46E+06     | 1.14E+07     | 6.07E+06  | 3.16E+06  | 5.17E+06  | 2.99E+06  | 3.78E+06  | 3.32E+06  | 9.11E+06            | 4.08E+06        | 2.23                      | 0.000918344                             | 1.20        |          |
| P30613    | Pyruvate kinase PKLR OS=Homo sapiens OX=9066 GN=PKLR PE=1 Sv=2                                             | 13           | 196    | 5                 | 1.42E+07     | 1.59E+07     | 1.16E+07     | 1.16E+07     | 1.07E+07     | 1.16E+07     | 1.79E+07  | 1.98E+07  | 1.49E+07  | 1.55E+07  | 1.35E+07  | 1.17E+07  | 1.26E+07            | 1.55E+07        | 0.81                      | 0.073344758                             | -0.30       |          |
| P25290    | Beta-5-oxoprolactone oxidoreductase OS=Homo sapiens OX=9066 GN=CBPZ1 PE=1 Sv=3                             | 13           | 96     | 5                 | 2.29E+07     | 2.22E+07     | 2.44E+07     | 2.44E+07     | 2.44E+07     | 2.44E+07     | 2.44E+07  | 2.44E+07  | 2.44E+07  | 2.44E+07  | 2.44E+07  | 2.44E+07  | 2.44E+07            | 2.44E+07        | 1.37                      | 0.02327575                              | 0.45        |          |
| P16278    | Beta-galactosidase OS=Homo sapiens OX=9066 GN=GLB1 PE=1 Sv=2                                               | 13           | 36     | 5                 | 1.31E+07     | 1.24E+07     | 1.05E+07     | 1.05E+07     | 1.05E+07     | 1.05E+07     | 1.05E+07  | 1.05E+07  | 1.05E+07  | 1.05E+07  | 1.05E+07  | 1.05E+07  | 1.05E+07            | 1.05E+07        | 1.05E+07                  | 1.05E+07                                | 1.05E+07    | 1.05E+07 |
| P17844    | Probable ATP-dependent RNA helicase DDX5 OS=Homo sapiens OX=9066 GN=DDX5 PE=1 Sv=1                         | 20           | 105    | 5                 | 9.90E+06     | 1.16E+07     | 1.05E+07     | 1.02E+07     | 1.08E+07     | 8.26E+06     | 5.33E+06  | 6.22E+06  | 4.79E+06  | 5.40E+06  | 4.52E+06  | 3.79E+06  | 1.02E+07            | 5.01E+06        | 2.04                      | 0.167936                                | 1.03        |          |
| O00487    | 26S proteasome non-ATPase regulatory subunit 14 OS=Homo sapiens OX=9066 GN=PSMD14 PE=1 Sv=1                | 36           | 63     | 5                 | 1.92E+07     | 2.30E+07     | 2.31E+07     | 1.72E+07     | 1.42E+07     | 1.42E+07     | 1.16E+07  | 1.92E+07  | 9.12E+06  | 7.35E+06  | 8.91E+06  | 9.83E+06  | 1.91E+07            | 1.10E+07        | 1.00                      | 0.00485815                              | 1.00        |          |
| P06858    | Liponin lipase OS=Homo sapiens OX=9066 GN=LPL PE=1 Sv=1                                                    | 19           | 52     | 5                 | 1.08E+07     | 9.72E+06     | 6.17E+06     | 1.01E+07     | 1.10E+07     | 5.17E+07     | 1.53E+07  | 1.41E+07  | 1.34E+07  | 1.14E+07  | 1.25E+07  | 9.60E+06  | 1.35E+07            | 0.71            | 0.00172828                | -0.24                                   |             |          |
| Q04375    | D-3-phosphoglycerate dehydrogenase OS=Homo sapiens OX=9066 GN=PHGDH PE=1 Sv=4                              | 15           | 112    | 5                 | 4.05E+07     | 4.23E+07     | 3.45E+07     | 4.36E+07     | 3.18E+07     | 3.62E+07     | 5.10E+07  | 5.20E+07  | 4.43E+07  | 4.19E+07  | 4.34E+07  | 3.80E+07  | 3.82E+07            | 4.52E+07        | 0.84                      | 0.00386253                              | -0.49       |          |
| P20073    | Chord nuclear protein 4 OS=Homo sapiens OX=9066 GN=NCU4 PE=1 Sv=4                                          | 35           | 62     | 5                 | 1.92E+07     | 1.79E+07     | 1.91E+07     | 1.91E+07     | 1.91E+07     | 1.91E+07     | 1.91E+07  | 1.91E+07  | 1.91E+07  | 1.91E+07  | 1.91E+07  | 1.91E+07  | 1.91E+07            | 1.91E+07        | 1.91E+07                  | 1.91E+07                                | 1.91E+07    | 1.91E+07 |
| P30050    | 60S ribosomal protein L12 OS=Homo sapiens OX=9066 GN=RPL12 PE=1 Sv=1                                       | 45           | 142    | 5                 | 3.88E+07     | 4.15E+07     | 3.07E+07     | 2.72E+07     | 3.13E+07     | 3.34E+07     | 3.38E+07  | 4.05E+07  | 2.90E+07  | 3.08E+07  | 2.72E+07  | 2.65E+07  | 3.38E+07            | 3.13E+07        | 1.08                      | 0.1430112375                            | 1.08        |          |
| P21926    | CD9 antigen OS=Homo sapiens OX=9066 GN=CD9 PE=1 Sv=4                                                       | 21           | 179    | 5                 | 1.01E+08     | 9.41E+07     | 9.44E+07     | 1.09E+08     | 9.57E+07     | 9.34E+07     | 7.32E+07  | 7.22E+07  | 7.22E+07  | 6.42E+07  | 6.12E+07  | 6.42E+07  | 9.79E+07            | 6.86E+07        | 0.51                      | 8.4871E-06                              | 1.43        |          |
| Q9Y4K0    | Lysyl oxidase homolog 2 OS=Homo sapiens OX=9066 GN=LOXL2 PE=1 Sv=1                                         | 11           | 40     | 5                 | 5.42E+06     | 6.29E+06     | 5.30E+06     | 5.92E+06     | 5.19E+06     | 4.71E+06     | 1.15E+07  | 1.16E+07  | 1.16E+07  | 9.89E+06  | 9.13E+06  | 8.83E+06  | 5.47E+06            | 1.04E+07        | 0.52                      | 0.69966E-05                             | 0.52        |          |
| Q9YK40    | cAMP-dependent protein kinase type I-alpha regulatory subunit OS=Homo sapiens OX=9066 GN=PRKAR1A PE=1 Sv=1 | 22           | 82     | 5                 | 1.23E+07     | 1.12E+07     | 9.75E+06     | 1.27E+07     | 1.40E+07     | 1.13E+07     | 1.28E+07  | 1.24E+07  | 7.55E+06  | 7.83E+06  | 1.24E+07  | 1.08E+07  | 1.19E+07            | 1.06E+07        | 0.16                      | 0.29772265                              | -0.16       |          |
| Q14786    | Neuropilin-1 OS=Homo sapiens OX=9066 GN=NP1 PE=1 Sv=3                                                      | 11           | 52     | 5                 | 1.34E+07     | 1.46E+07     | 1.25E+07     | 1.41E+07     | 1.16E+07     | 1.04E+07     | 1.05E+07  | 9.38E+06  | 7.56E+06  | 9.75E+06  | 7.60E+06  | 7.86E+06  | 1.29E+07            | 8.79E+06        | 1.45                      | 0.000612827                             | 1.45        |          |
| P22234    | Multifunctional protein ADE2 OS=Homo sapiens OX=9066 GN=PAICS PE=1 Sv=3                                    | 21           | 24     | 5                 | 6.12E+06     | 1.36E+07     | 5.07E+06     | 6.12E+06     | 6.12E+06     | 6.12E+06     | 5.79E+06  | 6.46E+06  | 3.37E+06  | 3.42E+06  | 5.30E+06  | 5.72E+06  | 9.77E+06            | 5.01E+06        | 0.86                      | 0.015273477                             | 0.86        |          |
| O00151    | PDZ and LIM domain protein 1 OS=Homo sapiens OX=9066 GN=PDLIM1 PE=1 Sv=4                                   | 21           | 24     | 5                 | 1.27E+07     | 1.09E+07     | 7.60E+06     | 9.94E+06     | 1.03E+07     | 1.01E+07     | 6.99E+06  | 7.05E+06  | 4.52E+06  | 5.86E+06  | 5.37E+06  | 5.54E+06  | 1.03E+07            | 5.89E+06        | 1.74                      | 0.000500038                             | 1.74        |          |
| P20618    | Proteasome subunit beta type-1 OS=Homo sapiens OX=9066 GN=PSMB1 PE=1 Sv=2                                  | 32           | 76     | 5                 | 2.01E+07     | 2.03E+07     | 2.04E+07     | 2.10E+07     | 2.19E+07     | 2.31E+07     | 2.31E+07  | 2.23E+07  | 2.30E+07  | 2.37E+07  | 2.03E+07  | 1.79E+07  | 2.11E+07            | 2.17E+07        | 0.97                      | 0.59856577                              | -0.34       |          |
| P27361    | Mitogen-activated protein kinase 3 OS=Homo sapiens OX=9066 GN=MAPK3 PE=1 Sv=4                              | 25           | 76     | 5                 | 2.81E+07     | 2.60E+07     | 1.81E+07     | 2.44E+07     | 2.22E+07     | 1.88E+07     | 2.18E+07  | 1.80E+07  | 2.00E+07  | 1.77E+07  | 1.60E+07  | 2.34E+07  | 2.07E+07            | 1.25            | 0.020872159               | 1.25                                    |             |          |
| P11279    | Lysosome-associated membrane glycoprotein 1 OS=Homo sapiens OX=9066 GN=LAMP1 PE=1 Sv=3                     | 12           | 126    | 5                 | 6.23E+07     | 5.77E+07     | 5.88E+07     | 5.94E+07     | 5.62E+07     | 5.30E+07     | 2.02E+07  | 3.26E+07  | 3.07E+07  | 1.82E+07  | 1.81E+07  | 2.63E+07  | 3.17E+07            | 2.44E+07        | 1.24                      | 5.57772E-06                             | 1.24        |          |
| P00119    | Ras-related protein Rab-2A OS=Homo sapiens OX=9066 GN=RAB2A PE=1 Sv=1                                      | 32           | 80     | 5                 | 1.40E+07     | 1.21E+07     | 1.52E+07     | 1.34E+07     | 1.47E+07     | 1.05E+07     | 1.27E+07  | 1.06E+07  | 1.12E+07  | 9.47E+06  | 1.09E+07  | 8.69E+06  | 1.41E+07            | 1.06E+07        | 1.32                      | 0.00085458                              | 1.32        |          |
| P52239    | Importin subunit alpha-1 OS=Homo sapiens OX=9066 GN=IMP2 PE=1 Sv=1                                         | 25           | 40     | 5                 | 1.92E+07     | 1.83E+07     | 1.92E+07     | 1.92E+07     | 1.92E+07     | 1.92E+07     | 1.92E+07  | 1.92E+07  | 1.92E+07  | 1.92E+07  | 1.92E+07  | 1.92E+07  | 1.92E+07            | 1.92E+07        | 1.92E+07                  | 1.92E+07                                | 1.92E+07    | 1.92E+07 |
| Q6V017    | Protocadherin Fat 4 OS=Homo sapiens OX=9066 GN=GFAT4 PE=1 Sv=2                                             | 2            | 26     | 5                 | 4.67E+06     | 3.73E+06     | 4.64E+06     | 3.10E+06     | 4.70E+06     | 3.50E+06     | 7.24E+06  | 7.46E+06  | 6.02E+06  | 5.83E+06  | 6.19E+06  | 7.14E+06  | 4.06E+06            | 6.65E+06        | 0.61                      | 0.187968E-05                            | 0.61        |          |
| Q15435    | Protein phosphatase 1 regulatory subunit 7 OS=Homo sapiens OX=9066 GN=PPP1R7 PE=1 Sv=1                     | 19           | 90     | 5                 | 1.10E+07     | 1.48E+07     | 1.20E+07     | 1.47E+07     | 1.17E+07     | 1.27E+07     | 1.37E+07  | 8.95E+06  | 1.34E+07  | 1.67E+07  | 1.18E+07  | 1.20E+07  | 1.23E+07            | 1.28E+07        | -0.76                     | 0.734981671                             | -0.76       |          |
| P35268    | 60S ribosomal protein L22 OS=Homo sapiens OX=9066 GN=RPL22 PE=1 Sv=2                                       | 49           | 64     | 5                 | 1.51E+07     | 4.93E+07     | 1.75E+07     | 1.75E+07     | 1.75E+07     | 1.41E+07     | 1.97E+07  | 1.82E+07  | 1.83E+07  | 1.59E+07  | 1.78E+07  | 1.53E+07  | 1.47E+07            | 1.75E+07        | 1.00                      | 0.070062315                             | 1.00        |          |
| P09900    | Proteasome subunit alpha type-B OS=Homo sapiens OX=9066 GN=PSMA6 PE=1 Sv=1                                 | 25           | 115    | 5                 | 4.05E+07     | 4.58E+07     | 4.04E+07     | 5.14E+07     | 4.14E+07     | 3.38E+07     | 4.23E+07  | 4.77E+07  | 4.93E+07  | 5.82E+07  | 4.23E+07  | 3.27E+07  | 4.03E+07            | 4.59E+07        | -0.19                     | 1.374809E-09                            | -0.19       |          |
| Q08927    | Glyoxylate reductase/hydroxypyruvate reductase OS=Homo sapiens OX=9066 GN=GRHPR PE=1 Sv=1                  | 26           | 66     | 5                 | 8.34E+06     | 9.21E+06     | 9.21E+06     | 1.15E+07     | 8.29E+06     | 1.10E+07     | 9.32E+06  | 9.63E+06  | 9.32E+06  | 9.63E+06  | 9.63E+06  | 9.65E+06  | 9.76E+06            | 1.01E+07        | -0.06                     | 0.626018192                             | -0.06       |          |
| P61223    | Ras-related protein Rap-2b OS=Homo sapiens OX=9066 GN=RAP2B PE=1 Sv=1                                      | 6            | 26     | 5                 | 3.82E+06     | 1.73E+07     | 1.89E+07     | 1.89E+07     | 1.89E+07     | 1.89E+07     | 1.89E+07  | 1.89E+07  | 1.89E+07  | 1.89E+07  | 1.89E+07  | 1.89E+07  | 1.89E+07            | 1.89E+07        | 1.89E+07                  | 1.18                                    | 0.021366336 | 1.18     |
| Q00666    | Neuroblast differentiation-associated protein AHNAK OS=Homo sapiens OX=9066 GN=AHNAK PE=1 Sv=2             | 3            | 27     | 5                 | 8.34E+06     | 5.61E+06     | 8.92E+06     | 9.47E+06     | 6.91E+06     | 1.13E+07     | 7.25E+06  | 8.82E+06  | 7.20E+06  | 8.20E+06  | 5.65E+06  | 6.66E+06  | 7.68E+06            | 7.63E+06        | 1.01                      | 0.069113912                             | 1.01        |          |
| Q9BR76    | Coronin-1B OS=Homo sapiens OX=9066 GN=CORO1B PE=1 Sv=1                                                     | 14           | 66     | 5                 | 2.03E+07     | 1.75E+07     | 1.75E+07     | 1.75E+07     | 1.75E+07     | 1.41E+07     | 1.97E+07  | 1.82E+07  | 1.83E+07  | 1.59E+07  | 1.78E+07  | 1.53E+07  | 1.47E+07            | 1.75E+07        | 1.00                      | 0.007062315                             | 1.00        |          |
| P47756    | F-actin-capping protein subunit beta OS=Homo sapiens OX=9066 GN=CAPZB PE=1 Sv=4                            | 26           | 50     | 5                 | 1.51E+07     | 1.50E+07     | 1.34E+07     | 1.26E+07     | 1.19E+07     | 1.39E+07     | 9.57E+06  | 1.16E+07  | 1.03E+07  | 9.71E+06  | 7.71E+06  | 7.58E+06  | 1.36E+07            | 9.41E+06        | 0.53                      | 0.000481615                             | 0.53        |          |
| Q9XK55    | AP-1 complex subunit mu-1 OS=Homo sapiens OX=9066 GN=AP1M1 PE=1 Sv=3                                       | 18           | 61     | 5                 | 1.28E+07     | 1.29E+07     | 1.50E+07     | 1.40E+07     | 1.33E+07     | 1.23E+07     | 7.88E+06  | 7.54E+06  | 5.41E+06  | 6.79E+06  | 5.27E+06  | 5.69E+06  | 1.34E+07            | 6.43E+06        | 2.08                      | 0.5590849E-06                           | 2.08        |          |
| P00119    | Importin subunit alpha-1 OS=Homo sapiens OX=9066 GN=IMP2 PE=1 Sv=1                                         | 25           | 40     | 5                 | 1.92E+07     | 1.83E+07     | 1.92E+07     | 1.92E+07     | 1.92E+07     | 1.92E+07     | 1.92E+07  | 1.92E+07  | 1.92E+07  | 1.92E+07  | 1.92E+07  | 1.92E+07  | 1.92E+07            | 1.92E+07        | 1.92E+07                  | 1.92E+07                                | 1.92E+07    |          |
| P13204    | Proliferating cell nuclear antigen OS=Homo sapiens OX=9066 GN=PCNA PE=1 Sv=1                               | 25           | 40     | 5                 | 6.83E+06     | 1.22E+07     | 1.50E+07     | 1.40E+07     | 1.50E+07     | 1.31E+07     | 5.89E+06  | 1.09E+07  | 6.54E+06  | 1.22E+07  | 9.93E+06  | 1.08E+07  | 1.27E+07            | 9.38E+06        | 1.36                      | 0.0477290312                            | 1.36        |          |
| P07686    | Beta-hexosaminidase subunit beta OS=Homo sapiens OX=9066 GN=HEXB PE=1 Sv=3                                 | 15           | 17     | 5                 | 5.18E+06     | 3.34E+06     | 4.16E+06     | 2.34E+06     | 1.69E+06     | 1.77E+06     | 6.27E+05  | 1.76E+06  | 6.21E+05  | 1.22E+06  | 8.90E+05  | 1.85E+06  | 2.46E+06            | 1.16E+06        | 0.11                      | 0.1154984E-06                           | 0.11        |          |
| Q96KP4    | Cytosolic non-specific dipeptidase OS=Homo sapiens OX=9066 GN=CNDP2 PE=1 Sv=2                              | 19           | 91     | 5                 | 1.56E+07     | 2.93E+07     | 2.37E+07     | 1.67E+07     | 1.82E+07     | 1.73E+07     | 2.43E+07  | 2.42E+07  | 1.88E+07  | 2.53E+07  | 1.68E+07  | 1.98E+07  | 2.11E+07            | 1.98E+07        | -0.09                     | 0.643617171                             | -0.09       |          |
| P04062    | Lysosomal acid glucosylceramidase OS=Homo sapiens OX=9066 GN=GBA PE=1 Sv=1                                 | 15           | 42     | 5                 | 7.62E+06     | 6.78E+06     | 7.85E+06     | 5.84E+06     | 6.87E+06     | 6.11E+06     | 5.90E+06  | 5.59E+06  | 4.51E+06  |           |           |           |                     |                 |                           |                                         |             |          |

# Supplementary Table 4. List of all proteins identified by label free proteomics analysis.

| Accession | Description                                                                                                   | Coverage [%] | # PSMs | # Unique Peptides | Antitriptyline 1 | Antitriptyline 2 | Antitriptyline 3 | Antitriptyline 4 | Antitriptyline 5 | Antitriptyline 6 | Antitriptyline 7 | Antitriptyline 8 | Antitriptyline 9 | Antitriptyline 10 | Antitriptyline 11 | Antitriptyline 12 | Average antitriptyline | Average vehicle | Ratio antitriptyline/vehicle | Log <sub>2</sub> fold change (antitriptyline/vehicle) | P-value |
|-----------|---------------------------------------------------------------------------------------------------------------|--------------|--------|-------------------|------------------|------------------|------------------|------------------|------------------|------------------|------------------|------------------|------------------|-------------------|-------------------|-------------------|------------------------|-----------------|------------------------------|-------------------------------------------------------|---------|
| P0851     | Heterogeneous nuclear ribonucleoprotein A1 OS=Homo sapiens OX=9606 GN=HNRNP1A1 PE=1 SV=5                      | 23           | 98     | 6                 | 1.76E+07         | 2.55E+07         | 1.97E+07         | 2.18E+07         | 1.83E+07         | 2.23E+07         | 1.45E+07         | 1.45E+07         | 1.12E+07         | 1.13E+07          | 1.17E+07          | 9.34E+06          | 2.09E+07               | 1.21E+07        | 1.73                         | 0.000206591                                           |         |
| P07858    | Cathepsin B OS=Homo sapiens OX=9606 GN=CTSB PE=1 SV=3                                                         | 24           | 92     | 6                 | 2.81E+07         | 2.12E+07         | 2.62E+07         | 2.42E+07         | 2.70E+07         | 1.45E+07         | 1.37E+07         | 1.13E+07         | 1.15E+07         | 1.21E+07          | 1.06E+07          | 2.56E+07          | 4.06E38E+06            | 1.23E+07        | 2.08                         | 4.00E38E+06                                           |         |
| Q12904    | Amoacyl tRNA synthase complex-interacting multifunctional protein 1 OS=Homo sapiens OX=9606 GN=AMP1 PE=1 SV=2 | 25           | 72     | 6                 | 2.07E+07         | 1.88E+07         | 1.56E+07         | 1.89E+07         | 1.63E+07         | 1.80E+07         | 9.11E+06         | 8.70E+06         | 8.62E+06         | 9.56E+06          | 1.06E+07          | 7.70E+06          | 1.77E+07               | 9.05E+06        | 1.96                         | 2.65149E+06                                           |         |
| Q15555    | Microtubule-associated protein RP/EB family member 2 OS=Homo sapiens OX=9606 GN=MAPRE2 PE=1 SV=1              | 25           | 123    | 6                 | 1.68E+07         | 1.75E+07         | 1.89E+07         | 1.87E+07         | 1.58E+07         | 1.65E+07         | 2.30E+07         | 2.80E+07         | 2.61E+07         | 1.98E+07          | 1.81E+07          | 2.10E+07          | 1.79E+07               | 2.27E+07        | 1.09                         | 0.0257944                                             |         |
| Q39714    | 3-hydroxyacyl-CoA dehydrogenase type 2 OS=Homo sapiens OX=9606 GN=HSD17B10 PE=1 SV=3                          | 24           | 66     | 6                 | 1.70E+07         | 1.70E+07         | 1.99E+07         | 1.21E+07         | 1.21E+07         | 1.87E+07         | 1.41E+07         | 1.19E+07         | 1.03E+07         | 8.00E+06          | 1.03E+07          | 1.01E+07          | 1.57E+07               | 1.98E+07        | 1.46                         | 0.011127501                                           |         |
| P08403    | Nucleolar protein 58 OS=Homo sapiens OX=9606 GN=N58 PE=1 SV=1                                                 | 24           | 96     | 6                 | 1.85E+07         | 1.45E+07         | 1.91E+07         | 1.86E+07         | 2.05E+07         | 1.67E+07         | 1.55E+07         | 5.23E+06         | 5.23E+06         | 1.33E+06          | 9.70E+06          | 1.46E+06          | 1.33E+06               | 9.72E+06        | 1.73                         | 0.000713073                                           |         |
| P30419    | Glycylpeptide N-tetraacyltransferase 1 OS=Homo sapiens OX=9606 GN=NTM1 PE=1 SV=2                              | 23           | 92     | 6                 | 3.09E+07         | 2.94E+07         | 2.74E+07         | 2.53E+07         | 2.73E+07         | 2.67E+07         | 2.32E+07         | 1.97E+07         | 2.32E+07         | 2.30E+07          | 1.94E+07          | 1.70E+07          | 1.57E+07               | 2.10E+07        | 1.33                         | 0.0045387                                             |         |
| P01857    | Immunoglobulin heavy constant gamma 1 OS=Homo sapiens OX=9606 GN=IGHG1 PE=1 SV=1                              | 38           | 33     | 6                 | 1.12E+07         | 1.57E+07         | 2.12E+07         | 2.34E+07         | 2.25E+07         | 2.19E+07         | 3.45E+07         | 1.78E+07         | 2.08E+07         | 1.98E+07          | 2.03E+07          | 1.07E+08          | 1.93E+07               | 3.88E+07        | 0.53                         | 0.280131754                                           |         |
| P18669    | Phosphoglycerate mutase 1 OS=Homo sapiens OX=9606 GN=PGAM1 PE=1 SV=2                                          | 37           | 125    | 6                 | 4.05E+07         | 3.85E+07         | 2.86E+07         | 3.69E+07         | 3.00E+07         | 3.15E+07         | 3.95E+07         | 3.70E+07         | 2.89E+07         | 3.37E+07          | 3.36E+07          | 3.18E+07          | 3.43E+07               | 3.41E+07        | 1.01                         | 0.92093334                                            |         |
| P04745    | Alpha-1-antitrypsin 1 OS=Homo sapiens OX=9606 GN=AMY1A PE=1 SV=2                                              | 12           | 304    | 6                 | 1.38E+08         | 1.43E+08         | 1.24E+08         | 1.37E+08         | 1.25E+08         | 1.64E+08         | 1.49E+08         | 1.39E+08         | 1.58E+08         | 1.24E+08          | 1.33E+08          | 1.31E+08          | 1.44E+08               | 1.44E+08        | 0.91                         | 1.003320306                                           |         |
| P31146    | Coronin-1A OS=Homo sapiens OX=9606 GN=CORO1A PE=1 SV=4                                                        | 26           | 133    | 6                 | 2.96E+07         | 2.32E+07         | 2.21E+07         | 2.74E+07         | 2.44E+07         | 2.36E+07         | 3.64E+07         | 3.98E+07         | 2.85E+07         | 3.05E+07          | 2.62E+07          | 3.04E+07          | 2.44E+07               | 3.20E+07        | -0.19                        | 0.013136093                                           |         |
| P21131    | Basigin OS=Homo sapiens OX=9606 GN=BSG PE=1 SV=2                                                              | 21           | 131    | 6                 | 1.93E+07         | 1.85E+07         | 1.82E+07         | 1.76E+07         | 1.86E+07         | 2.05E+07         | 1.67E+07         | 1.55E+07         | 1.35E+07         | 1.37E+07          | 1.41E+07          | 1.41E+07          | 2.24E+07               | 2.93E+07        | 1.88                         | 8.5245E+06                                            |         |
| P08243    | Asparagine synthetase [glutamine-hydrolyzing] OS=Homo sapiens OX=9606 GN=ASNS PE=1 SV=4                       | 18           | 52     | 6                 | 9.54E+06         | 7.80E+06         | 9.53E+06         | 1.03E+07         | 6.90E+06         | 7.59E+06         | 6.53E+06         | 7.28E+06         | 6.34E+06         | 7.09E+06          | 6.78E+06          | 6.90E+06          | 8.61E+06               | 6.81E+06        | 1.26                         | 0.02148764                                            |         |
| Q60749    | Zeranolxin-2 OS=Homo sapiens OX=9606 GN=SNX2 PE=1 SV=2                                                        | 20           | 131    | 6                 | 2.13E+07         | 2.37E+07         | 2.27E+07         | 2.30E+07         | 2.12E+07         | 1.97E+07         | 2.25E+07         | 2.10E+07         | 2.05E+07         | 2.18E+07          | 1.57E+07          | 2.05E+07          | 2.19E+07               | 2.07E+07        | 0.34                         | 0.34619375                                            |         |
| Q30399    | Homogentisate 1,2-dioxygenase OS=Homo sapiens OX=9606 GN=HGD PE=1 SV=4                                        | 19           | 158    | 6                 | 1.75E+07         | 1.93E+07         | 2.31E+07         | 1.62E+07         | 2.53E+07         | 1.65E+07         | 2.50E+07         | 2.58E+07         | 2.19E+07         | 2.40E+07          | 2.30E+07          | 1.98E+07          | 1.97E+07               | 2.32E+07        | 0.85                         | 0.077537453                                           |         |
| P27635    | 60S ribosomal protein L10 OS=Homo sapiens OX=9606 GN=RPL10 PE=1 SV=2                                          | 31           | 101    | 6                 | 5.33E+07         | 4.82E+07         | 4.88E+07         | 5.54E+07         | 4.78E+07         | 4.54E+07         | 2.62E+07         | 2.77E+07         | 3.15E+07         | 2.17E+07          | 1.91E+07          | 4.98E+07          | 2.48E+07               | 1.20            | 1.34317E+06                  |                                                       |         |
| P09103    | Serine/arginine-rich splicing factor 3 OS=Homo sapiens OX=9606 GN=SRSF3 PE=1 SV=1                             | 41           | 152    | 6                 | 4.95E+07         | 4.40E+07         | 3.66E+07         | 4.11E+07         | 4.37E+07         | 3.71E+07         | 3.21E+07         | 2.95E+07         | 2.70E+07         | 3.03E+07          | 2.61E+07          | 2.32E+07          | 4.20E+07               | 2.80E+07        | 1.50                         | 0.000270887                                           |         |
| Q12124    | Eukaryotic translation initiation factor 3 subunit 1 OS=Homo sapiens OX=9606 GN=EIF3M1 PE=1 SV=1              | 24           | 28     | 6                 | 9.52E+06         | 8.40E+06         | 8.40E+06         | 8.57E+06         | 9.56E+06         | 1.45E+06         | 5.44E+06         | 3.76E+06         | 2.18E+06         | 1.39E+06          | 2.54E+06          | 6.50E+06          | 2.50E+06               | 3.16E+06        | 0.98                         | 0.002022277                                           |         |
| P31689    | DnaI homolog subfamily A member 1 OS=Homo sapiens OX=9606 GN=DNAI1A PE=1 SV=2                                 | 23           | 55     | 6                 | 1.21E+07         | 1.75E+07         | 1.47E+07         | 1.60E+07         | 1.73E+07         | 1.65E+07         | 6.92E+06         | 7.20E+06         | 7.66E+06         | 8.71E+06          | 6.53E+06          | 7.15E+06          | 1.57E+07               | 7.36E+06        | 2.13                         | 5.20254E+05                                           |         |
| Q16394    | Exostasin-1 OS=Homo sapiens OX=9606 GN=EXT1 PE=1 SV=2                                                         | 11           | 116    | 6                 | 1.95E+07         | 1.89E+07         | 1.44E+07         | 1.38E+07         | 1.18E+07         | 1.75E+07         | 2.58E+07         | 2.82E+07         | 1.96E+07         | 1.61E+07          | 2.11E+07          | 2.37E+07          | 1.60E+07               | 2.24E+07        | -0.49                        | 0.016203370                                           |         |
| P49721    | Proteasome subunit beta type 2 OS=Homo sapiens OX=9606 GN=PSMB2 PE=1 SV=1                                     | 46           | 75     | 6                 | 2.10E+07         | 2.27E+07         | 1.97E+07         | 1.81E+07         | 2.01E+07         | 2.06E+07         | 2.28E+07         | 1.84E+07         | 1.55E+07         | 2.10E+07          | 1.58E+07          | 1.99E+07          | 1.90E+07               | 1.90E+07        | 0.71                         | 0.54208023                                            |         |
| Q3UL46    | Proteasome activator complex subunit 2 OS=Homo sapiens OX=9606 GN=PSME2 PE=1 SV=1                             | 36           | 28     | 6                 | 7.37E+07         | 4.87E+07         | 4.62E+07         | 7.52E+07         | 6.49E+07         | 5.52E+07         | 4.52E+07         | 6.37E+07         | 2.78E+07         | 3.65E+07          | 4.86E+07          | 3.40E+07          | 6.06E+07               | 3.82E+07        | 1.59                         | 0.006812268                                           |         |
| P27229    | E-pyrophosphatase dehydrogenase, decarboxylating OS=Homo sapiens OX=9606 GN=PGD PE=1 SV=3                     | 20           | 120    | 6                 | 4.99E+07         | 5.13E+07         | 5.08E+07         | 5.75E+07         | 5.49E+07         | 4.98E+07         | 6.52E+07         | 6.71E+07         | 6.06E+07         | 5.83E+07          | 5.44E+07          | 5.24E+07          | 6.66E+07               | 6.66E+07        | -0.35                        | 0.010082499                                           |         |
| P30566    | Adenylyltransferase OS=Homo sapiens OX=9606 GN=ADSL PE=1 SV=2                                                 | 24           | 71     | 6                 | 2.08E+07         | 2.34E+07         | 2.28E+07         | 2.28E+07         | 2.08E+07         | 2.24E+07         | 1.99E+07         | 1.82E+07         | 1.71E+07         | 2.04E+07          | 2.24E+07          | 2.34E+07          | 2.34E+07               | 2.34E+07        | -0.02                        | 0.845027107                                           |         |
| Q15459    | Splicing factor 3A subunit 1 OS=Homo sapiens OX=9606 GN=SF3A1 PE=1 SV=1                                       | 14           | 57     | 6                 | 8.78E+06         | 5.91E+06         | 7.94E+06         | 6.98E+06         | 6.81E+06         | 7.93E+06         | 4.34E+06         | 4.82E+06         | 6.06E+06         | 3.75E+06          | 4.32E+06          | 1.34E+06          | 7.39E+06               | 4.10E+06        | 1.80                         | 0.002164005                                           |         |
| P15559    | NAD(P)H dehydrogenase [quinone] 1 OS=Homo sapiens OX=9606 GN=NQO1 PE=1 SV=1                                   | 31           | 35     | 6                 | 2.66E+07         | 2.97E+07         | 3.93E+07         | 4.00E+07         | 3.68E+07         | 3.27E+07         | 2.74E+07         | 2.49E+07         | 3.00E+07         | 1.98E+07          | 1.69E+07          | 1.64E+07          | 3.42E+07               | 2.26E+07        | 1.51                         | 0.6500479335                                          |         |
| Q3UJH8    | Septin-9 OS=Homo sapiens OX=9606 GN=SEPT9 PE=1 SV=1                                                           | 13           | 62     | 6                 | 1.83E+07         | 2.21E+07         | 1.99E+07         | 2.03E+07         | 1.79E+07         | 1.80E+07         | 2.03E+07         | 1.54E+07         | 1.66E+07         | 1.70E+07          | 1.53E+07          | 1.27E+07          | 1.94E+07               | 1.62E+07        | 1.20                         | 0.027414774                                           |         |
| Q99536    | Synaptic vesicle membrane protein VAT1 L homolog OS=Homo sapiens OX=9606 GN=VAT1 PE=1 SV=2                    | 30           | 65     | 6                 | 1.42E+07         | 1.51E+07         | 1.92E+07         | 1.47E+07         | 1.36E+07         | 1.78E+07         | 2.50E+07         | 4.09E+07         | 1.78E+07         | 1.68E+07          | 1.40E+07          | 1.57E+07          | 1.48E+07               | 1.07            | 0.1503314891                 |                                                       |         |
| Q29499    | ATP-dependent RNA helicase 8 OS=Homo sapiens OX=9606 GN=DDX1 PE=1 SV=2                                        | 26           | 129    | 6                 | 7.75E+06         | 7.82E+06         | 8.00E+06         | 8.70E+06         | 9.60E+06         | 7.80E+06         | 6.82E+06         | 6.82E+06         | 6.82E+06         | 6.70E+06          | 7.25E+06          | 6.84E+06          | 8.84E+06               | 8.84E+06        | 1.26                         | 0.001545781                                           |         |
| P08173    | Complement decay-accelerating factor 3 OS=Homo sapiens OX=9606 GN=CD35 PE=1 SV=4                              | 20           | 76     | 6                 | 2.20E+07         | 1.70E+07         | 1.98E+07         | 1.80E+07         | 2.24E+07         | 1.89E+07         | 1.89E+07         | 1.89E+07         | 1.89E+07         | 1.89E+07          | 1.89E+07          | 1.89E+07          | 2.21E+07               | 2.15E+07        | 0.25                         | 2.1711E+05                                            |         |
| Q1MKD3    | Heterogeneous nuclear ribonucleoprotein L-like protein 2 OS=Homo sapiens OX=9606 GN=HNRNPUL2 PE=1 SV=1        | 11           | 66     | 6                 | 2.15E+07         | 2.07E+07         | 2.43E+07         | 1.80E+07         | 2.26E+07         | 2.01E+07         | 1.82E+07         | 1.71E+07         | 2.28E+07         | 2.01E+07          | 1.56E+07          | 1.21E+07          | 1.90E+07               | 1.11            | 0.145669718                  |                                                       |         |
| P46776    | 60S ribosomal protein L27a OS=Homo sapiens OX=9606 GN=RPL27A PE=1 SV=1                                        | 31           | 117    | 6                 | 4.46E+07         | 4.34E+07         | 4.90E+07         | 4.07E+07         | 3.82E+07         | 3.96E+07         | 3.00E+07         | 2.88E+07         | 2.53E+07         | 2.32E+07          | 2.60E+07          | 2.12E+07          | 4.25E+07               | 2.57E+07        | 1.67                         | 1.6369E+05                                            |         |
| Q27243    | Serine protease HTRA1 OS=Homo sapiens OX=9606 GN=HTRA1 PE=1 SV=2                                              | 15           | 66     | 6                 | 5.77E+06         | 1.22E+07         | 9.57E+06         | 1.20E+07         | 1.01E+07         | 1.15E+07         | 1.78E+07         | 2.12E+07         | 1.54E+07         | 1.47E+07          | 1.74E+07          | 1.85E+07          | 1.03E+07               | 1.75E+07        | -0.72                        | 0.000459262                                           |         |
| P25786    | Proteasome subunit alpha type 1 OS=Homo sapiens OX=9606 GN=PSMA1 PE=1 SV=1                                    | 22           | 127    | 6                 | 4.76E+07         | 4.74E+07         | 4.43E+07         | 3.88E+07         | 4.41E+07         | 3.70E+07         | 3.91E+07         | 4.90E+07         | 4.45E+07         | 4.22E+07          | 3.83E+07          | 3.15E+07          | 4.02E+07               | 4.08E+07        | 1.06                         | 0.442280152                                           |         |
| P49411    | Alpha-amylase 2 OS=Homo sapiens OX=9606 GN=AMY2A PE=1 SV=1                                                    | 17           | 42     | 6                 | 1.54E+07         | 1.47E+07         | 1.43E+07         | 1.23E+07         | 1.25E+07         | 1.23E+07         | 1.39E+07         | 1.39E+07         | 1.39E+07         | 1.39E+07          | 1.39E+07          | 1.39E+07          | 1.38E+07               | 1.21E+07        | 1.41                         | 0.027389154                                           |         |
| Q29598    | Head shock protein 105 kDa OS=Homo sapiens OX=9606 GN=HSPH1 PE=1 SV=5                                         | 9            | 58     | 6                 | 1.54E+07         | 1.46E+07         | 1.24E+07         | 1.23E+07         | 1.27E+07         | 1.18E+07         | 1.24E+07         | 1.98E+06         | 9.11E+06         | 1.10E+07          | 6.78E+06          | 6.71E+06          | 1.32E+07               | 9.48E+06        | 1.39                         | 0.48062372                                            |         |
| Q43684    | Mitotic checkpoint protein BUB3 OS=Homo sapiens OX=9606 GN=BUB3 PE=1 SV=1                                     | 21           | 87     | 6                 | 1.86E+07         | 2.10E+07         | 2.21E+07         | 2.12E+07         | 2.19E+07         | 1.88E+07         | 1.61E+07         | 1.75E+07         | 1.66E+07         | 1.65E+07          | 1.53E+07          | 1.36E+07          | 2.06E+07               | 1.59E+07        | 1.29                         | 0.00247396                                            |         |
| P49736    | DNA replication licensing factor MCM2 OS=Homo sapiens OX=9606 GN=MCM2 PE=1 SV=4                               | 9            | 56     | 6                 | 1.31E+07         | 1.43E+07         | 1.69E+07         | 1.33E+07         | 1.16E+07         | 1.38E+07         | 9.81E+06         | 9.82E+06         | 8.69E+06         | 8.93E+06          | 9.03E+06          | 7.76E+06          | 1.46E+07               | 9.01E+06        | 0.67                         | 0.707947E+05                                          |         |
| Q9H44     | Aminopeptidase B OS=Homo sapiens OX=9606 GN=RNPEP1 PE=1 SV=2                                                  | 12           | 40     | 6                 | 1.39E+07         | 1.29E+07         | 1.26E+07         | 1.36E+07         | 1.25E+07         | 1.35E+07         | 8.93E+06         | 1.15E+07         | 4.36E+06         | 3.67E+06          | 4.94E+06          | 6.92E+06          | 1.32E+07               | 6.71E+06        | 1.96                         | 0.029919677                                           |         |
| Q9NVA2    | Septin-11 OS=Homo sapiens OX=9606 GN=SEPT11 PE=1 SV=3                                                         | 21           | 129    | 6                 | 3.29E+07         | 3.33E+07         | 2.63E+07         | 2.76E+07         | 2.24E+07         | 2.42E+07         | 2.91E+07         | 2.87E+07         | 1.98E+07         |                   |                   |                   |                        |                 |                              |                                                       |         |

Supplemental Table 4. List of all proteins identified by label free proteomics analysis.

| Accession | Description                                                                                                          | Coverage [%] | # PSMs | # Unique Peptides | Antitriptingylne 1 | Antitriptingylne 2 | Antitriptingylne 3 | Antitriptingylne 4 | Antitriptingylne 5 | Antitriptingylne 6 | Vehicle 1 | Vehicle 2  | Vehicle 3 | Vehicle 4 | Vehicle 5 | Vehicle 6 | Average antitriptingylne | Average vehicle | Ratio antitriptingylne/vehicle | Log 2 fold change (antitriptingylne/vehicle) | P-value     |
|-----------|----------------------------------------------------------------------------------------------------------------------|--------------|--------|-------------------|--------------------|--------------------|--------------------|--------------------|--------------------|--------------------|-----------|------------|-----------|-----------|-----------|-----------|--------------------------|-----------------|--------------------------------|----------------------------------------------|-------------|
| P00736    | Complement C1r subcomponent OS=Homo sapiens OX=9606 GN=C1R PE=1 SV=2                                                 | 14           | 43     | 7                 | 5.75E+06           | 3.35E+06           | 3.62E+06           | 6.35E+06           | 5.03E+06           | 5.67E+06           | 8.39E+06  | 7.63E+06   | 9.83E+06  | 7.21E+06  | 6.70E+06  | 3.00E+07  | 4.96E+06                 | 1.16E+07        | -1.23                          | 0.13191979                                   |             |
| Q9NR30    | Nuclear RNA helicase 2 OS=Homo sapiens OX=9606 GN=DDX21 PE=1 SV=5                                                    | 14           | 64     | 7                 | 8.58E+06           | 9.13E+06           | 8.47E+06           | 7.28E+06           | 6.59E+06           | 7.70E+06           | 6.80E+06  | 4.86E+06   | 3.92E+06  | 5.67E+06  | 5.53E+06  | 7.98E+06  | 6.0790562                | 5.75E+06        | 1.39                           | 0.47                                         | 0.00790562  |
| P32969    | 60S ribosomal protein L9 OS=Homo sapiens OX=9606 GN=RPL9 PE=1 SV=1                                                   | 59           | 59     | 7                 | 5.53E+07           | 2.64E+07           | 1.97E+07           | 1.74E+07           | 1.70E+07           | 2.45E+07           | 1.12E+07  | 2.33E+07   | 1.45E+07  | 1.46E+07  | 2.19E+07  | 1.63E+07  | 2.00E+07                 | 1.70E+07        | 1.18                           | 0.24                                         | 0.26951843  |
| Q06830    | Peroxiredoxin-1 OS=Homo sapiens OX=9606 GN=PRDX1 PE=1 SV=1                                                           | 34           | 142    | 7                 | 5.53E+07           | 5.20E+07           | 6.12E+07           | 4.76E+07           | 4.75E+07           | 4.87E+07           | 2.41E+07  | 2.74E+07   | 2.49E+07  | 2.41E+07  | 2.85E+07  | 1.68E+07  | 5.04E+07                 | 2.43E+07        | 2.07                           | 1.05                                         | 4.18809E-07 |
| U15230    | Laminin subunit alpha-5 OS=Homo sapiens OX=9606 GN=LAMA5 PE=1 SV=8                                                   | 3            | 46     | 7                 | 1.13E+07           | 5.89E+06           | 8.21E+06           | 8.33E+06           | 1.06E+07           | 8.31E+06           | 1.20E+07  | 9.05E+06   | 7.92E+06  | 9.33E+06  | 6.67E+06  | 6.30E+06  | 8.76E+06                 | 8.87E+06        | 0.99                           | 0.020395658                                  |             |
| P14543    | Myosin-4 OS=Homo sapiens OX=9606 GN=MYO4 PE=1 SV=2                                                                   | 8            | 82     | 7                 | 1.93E+07           | 1.15E+07           | 1.24E+07           | 1.43E+07           | 1.19E+07           | 1.43E+07           | 1.24E+07  | 1.24E+07   | 1.24E+07  | 1.24E+07  | 1.24E+07  | 1.24E+07  | 1.24E+07                 | 1.24E+07        | 1.07E+07                       | 0.59                                         | 0.003029207 |
| P16133    | 60S ribosomal protein L15 OS=Homo sapiens OX=9606 GN=RPL15 PE=1 SV=1                                                 | 31           | 137    | 7                 | 7.63E+07           | 7.21E+07           | 7.68E+07           | 7.45E+07           | 6.81E+07           | 6.44E+07           | 4.58E+07  | 4.50E+07   | 4.35E+07  | 4.63E+07  | 3.94E+07  | 3.56E+07  | 7.05E+07                 | 4.26E+07        | 1.67                           | 0.73                                         | 8.53724E-07 |
| Q16666    | Gamma-interferon-inducible protein 16 OS=Homo sapiens OX=9606 GN=IFI16 PE=1 SV=3                                     | 10           | 73     | 7                 | 1.92E+07           | 1.85E+07           | 1.95E+07           | 2.25E+07           | 2.14E+07           | 2.00E+07           | 9.15E+06  | 7.06E+06   | 8.27E+06  | 8.06E+06  | 8.27E+06  | 5.68E+06  | 2.02E+07                 | 7.75E+06        | 1.60                           | 1.38                                         | 3.29898E-08 |
| O75475    | PC4 and SFRS1-interacting protein OS=Homo sapiens OX=9606 GN=PSIP1 PE=1 SV=1                                         | 17           | 65     | 7                 | 1.43E+07           | 1.48E+07           | 1.44E+07           | 1.50E+07           | 1.34E+07           | 1.39E+07           | 5.63E+06  | 5.20E+06   | 4.91E+06  | 4.04E+06  | 3.67E+06  | 5.50E+06  | 1.43E+07                 | 1.50E+06        | 2.96                           | 1.57                                         | 2.0519E-09  |
| P30101    | Protein disulfide-isomerase A3 OS=Homo sapiens OX=9606 GN=PIPD3 PE=1 SV=4                                            | 14           | 124    | 7                 | 2.40E+07           | 2.43E+07           | 2.41E+07           | 2.47E+07           | 2.78E+07           | 2.38E+07           | 2.85E+07  | 2.99E+07   | 2.83E+07  | 2.85E+07  | 2.52E+07  | 2.30E+07  | 2.51E+07                 | 2.71E+07        | 0.93                           | 0.11                                         | 1.186769308 |
| P30241    | Pantoic acidase OS=Homo sapiens OX=9606 GN=PAO PE=1 SV=1                                                             | 10           | 71     | 7                 | 1.92E+07           | 1.63E+07           | 1.63E+07           | 1.51E+07           | 1.69E+07           | 1.19E+07           | 1.59E+07  | 1.69E+07   | 1.69E+07  | 1.69E+07  | 1.69E+07  | 1.69E+07  | 1.69E+07                 | 1.69E+07        | 1.72E+07                       | 0.17                                         | 0.00362193  |
| P33748    | Flap endonuclease 1 OS=Homo sapiens OX=9606 GN=FEN1 PE=1 SV=1                                                        | 17           | 94     | 7                 | 9.95E+07           | 1.00E+08           | 9.81E+07           | 1.04E+08           | 8.75E+07           | 9.39E+07           | 8.25E+07  | 8.12E+07   | 8.73E+07  | 8.85E+07  | 7.82E+07  | 6.97E+07  | 9.72E+07                 | 8.12E+07        | 1.20                           | 0.26                                         | 0.01466215  |
| O94776    | Mastitis-associated protein MT42 OS=Homo sapiens OX=9606 GN=MTA2 PE=1 SV=1                                           | 12           | 28     | 7                 | 1.29E+07           | 1.30E+07           | 1.22E+07           | 1.42E+07           | 1.08E+07           | 1.16E+07           | 9.80E+06  | 6.46E+06   | 6.68E+06  | 6.76E+06  | 5.13E+06  | 5.52E+06  | 1.26E+07                 | 7.16E+06        | 0.82                           | 0.00020020                                   |             |
| Q9NZ94    | EH domain-containing protein 2 OS=Homo sapiens OX=9606 GN=EH2 PE=1 SV=2                                              | 18           | 132    | 7                 | 1.28E+07           | 1.28E+07           | 1.26E+07           | 1.39E+07           | 1.23E+07           | 1.43E+07           | 1.46E+07  | 1.23E+07   | 1.21E+07  | 1.24E+07  | 1.17E+07  | 1.05E+07  | 1.34E+07                 | 1.23E+07        | 1.10                           | 0.13                                         | 0.191221272 |
| Q9Y223    | Bifunctional UDP-N-acetylglucosamine 2-epimerase/N-acetylmannosamine kinase OS=Homo sapiens OX=9606 GN=GNE PE=1 SV=1 | 12           | 68     | 7                 | 1.48E+07           | 1.41E+07           | 1.11E+07           | 1.18E+07           | 1.22E+07           | 1.03E+07           | 1.41E+07  | 1.44E+07   | 1.24E+07  | 1.38E+07  | 1.17E+07  | 9.75E+06  | 1.21E+07                 | 1.27E+07        | 0.95                           | 0.07                                         | 0.533882523 |
| P22708    | CAD protein OS=Homo sapiens OX=9606 GN=CAD PE=1 SV=1                                                                 | 37           | 708    | 7                 | 7.57E+06           | 3.99E+06           | 1.19E+07           | 1.31E+07           | 1.09E+07           | 1.13E+07           | 7.77E+06  | 8.09E+06   | 8.37E+06  | 6.71E+06  | 6.07E+06  | 7.63E+06  | 1.08E+07                 | 7.77E+06        | 1.39                           | 0.00091683                                   |             |
| O13414    | Pro-mRNase L1 OS=Homo sapiens OX=9606 GN=PMR1 PE=1 SV=1                                                              | 10           | 245    | 7                 | 1.04E+07           | 1.34E+07           | 1.34E+07           | 1.71E+07           | 1.24E+07           | 1.24E+07           | 1.20E+07  | 1.27E+07   | 1.30E+07  | 1.19E+07  | 1.12E+07  | 1.75E+06  | 1.34E+07                 | 1.13E+07        | 0.24                           | 0.11                                         | 1.17469E-08 |
| Q9Y247    | Nck-associated protein 1 OS=Homo sapiens OX=9606 GN=NCKAP1 PE=1 SV=1                                                 | 6            | 83     | 7                 | 1.05E+07           | 1.16E+07           | 1.62E+06           | 1.18E+07           | 1.02E+06           | 8.33E+06           | 8.68E+06  | 7.82E+06   | 1.04E+07  | 9.92E+06  | 6.87E+06  | 6.63E+06  | 9.92E+06                 | 6.63E+06        | 0.25                           | 0.01                                         | 1.24273246  |
| P38117    | Electron transfer flavoprotein subunit beta OS=Homo sapiens OX=9606 GN=ETFb PE=1 SV=3                                | 35           | 40     | 7                 | 1.80E+07           | 1.83E+07           | 1.52E+07           | 1.77E+07           | 1.66E+07           | 1.85E+07           | 9.78E+06  | 9.01E+06   | 1.17E+07  | 1.12E+07  | 8.02E+06  | 6.54E+06  | 1.74E+07                 | 9.38E+06        | 0.79                           | 0.91                                         | 1.90347E-05 |
| P62081    | 40S ribosomal protein S7 OS=Homo sapiens OX=9606 GN=RPS7 PE=1 SV=1                                                   | 46           | 60     | 7                 | 2.19E+07           | 1.64E+07           | 1.60E+07           | 1.38E+07           | 1.41E+07           | 1.62E+07           | 1.08E+07  | 1.12E+07   | 8.22E+06  | 8.43E+06  | 9.74E+06  | 8.86E+06  | 1.64E+07                 | 9.55E+06        | 1.82                           | 0.89                                         | 0.0123388   |
| P49304    | Platelet-activating factor acetylhydrolase II subunit alpha OS=Homo sapiens OX=9606 GN=PAFAH1B1 PE=1 SV=2            | 21           | 46     | 7                 | 2.44E+07           | 2.48E+07           | 2.75E+07           | 2.65E+07           | 3.13E+07           | 2.50E+07           | 1.79E+07  | 1.93E+07   | 1.91E+07  | 1.68E+07  | 1.66E+07  | 1.29E+07  | 2.76E+07                 | 1.77E+07        | 1.50                           | 0.58                                         | 0.00117847  |
| P60709    | Actin, cytoplasmic 1 OS=Homo sapiens OX=9606 GN=ACTB PE=1 SV=1                                                       | 83           | 4523   | 7                 | 2.96E+09           | 2.75E+09           | 2.75E+09           | 2.73E+09           | 2.74E+09           | 2.87E+09           | 2.40E+09  | 2.21E+09   | 2.45E+09  | 2.43E+09  | 2.43E+09  | 2.29E+09  | 2.65E+09                 | 2.65E+09        | 0.23                           | 0.00                                         | 1.2377E-05  |
| P30241    | Keratin, type I cytoskeletal 14 OS=Homo sapiens OX=9606 GN=KRT14 PE=1 SV=4                                           | 45           | 534    | 7                 | 5.53E+07           | 6.75E+07           | 4.52E+07           | 6.82E+07           | 6.82E+07           | 6.82E+07           | 6.82E+07  | 6.82E+07   | 6.82E+07  | 6.82E+07  | 6.82E+07  | 6.82E+07  | 6.82E+07                 | 6.82E+07        | 3.31E+07                       | 0.22                                         | 0.00537448  |
| P27348    | 14-3-3 protein theta OS=Homo sapiens OX=9606 GN=YYHQA PE=1 SV=1                                                      | 42           | 159    | 8                 | 4.20E+07           | 4.31E+07           | 5.30E+07           | 4.45E+07           | 4.81E+07           | 4.45E+07           | 4.50E+07  | 4.42E+07   | 4.62E+07  | 4.66E+07  | 4.69E+07  | 3.25E+07  | 4.59E+07                 | 4.36E+07        | 1.05                           | 0.07                                         | 0.428267914 |
| P01023    | Alpha-2-macroglobulin OS=Homo sapiens OX=9606 GN=A2M PE=1 SV=3                                                       | 9            | 2864   | 8                 | 9.99E+09           | 9.99E+09           | 1.19E+10           | 1.07E+10           | 1.12E+10           | 1.06E+10           | 9.80E+09  | 8.98E+09   | 1.09E+10  | 1.00E+10  | 1.13E+10  | 9.11E+09  | 1.07E+10                 | 1.00E+10        | 1.10                           | 0.10                                         | 1.80898824  |
| O94973    | AP-2 complex subunit alpha-2 OS=Homo sapiens OX=9606 GN=AP2A2 PE=1 SV=2                                              | 25           | 100    | 8                 | 2.86E+07           | 3.25E+07           | 3.30E+07           | 3.31E+07           | 3.49E+07           | 3.88E+07           | 1.85E+07  | 2.06E+07   | 2.26E+07  | 1.49E+07  | 3.09E+07  | 1.96E+07  | 3.35E+07                 | 2.12E+07        | 1.58                           | 0.69                                         | 0.01271791  |
| P62937    | Pexidy-prolyl cis-trans isomerase A OS=Homo sapiens OX=9606 GN=PP1A PE=1 SV=2                                        | 67           | 305    | 8                 | 1.42E+08           | 1.43E+08           | 9.47E+07           | 9.63E+07           | 8.57E+07           | 1.16E+08           | 1.91E+08  | 1.44E+08   | 9.83E+07  | 1.02E+08  | 1.18E+08  | 1.20E+08  | 1.13E+08                 | 1.29E+08        | 0.88                           | 0.11                                         | 0.377781509 |
| Q16161    | Septin-7 OS=Homo sapiens OX=9606 GN=SEPT7 PE=1 SV=1                                                                  | 16           | 198    | 8                 | 6.72E+07           | 6.45E+07           | 4.02E+07           | 3.99E+07           | 3.80E+07           | 3.69E+07           | 2.30E+07  | 2.39E+07   | 2.60E+07  | 2.60E+07  | 3.24E+07  | 3.18E+07  | 4.12E+07                 | 3.85E+07        | 1.23                           | 0.30                                         | 0.00391985  |
| Q9NQD3    | Retculin-1 OS=Homo sapiens OX=9606 GN=RTN4 PE=1 SV=1                                                                 | 13           | 331    | 8                 | 4.75E+07           | 4.10E+07           | 4.48E+07           | 4.48E+07           | 4.48E+07           | 4.48E+07           | 4.48E+07  | 4.48E+07   | 4.48E+07  | 4.48E+07  | 4.48E+07  | 4.48E+07  | 4.48E+07                 | 4.48E+07        | 1.06                           | 0.11                                         | 0.27203232  |
| P61074    | Triosephosphate isomerase OS=Homo sapiens OX=9606 GN=TFPI PE=1 SV=3                                                  | 40           | 213    | 8                 | 6.28E+07           | 4.64E+07           | 4.64E+07           | 4.85E+07           | 4.24E+07           | 4.63E+07           | 6.22E+07  | 4.86E+07   | 4.31E+07  | 4.26E+07  | 4.40E+07  | 3.95E+07  | 4.93E+07                 | 4.65E+07        | 1.06                           | 0.88                                         | 0.567813307 |
| Q16401    | 26S proteasome non-ATPase regulatory subunit 5 OS=Homo sapiens OX=9606 GN=PSMD5 PE=1 SV=3                            | 21           | 104    | 8                 | 1.96E+07           | 1.58E+07           | 1.48E+07           | 1.93E+07           | 1.32E+07           | 1.60E+07           | 1.49E+07  | 1.26E+07   | 9.54E+06  | 7.63E+06  | 9.71E+06  | 1.13E+07  | 1.64E+07                 | 1.09E+07        | 0.59                           | 0.59                                         | 0.00392316  |
| P22626    | Heterogeneous nuclear ribonucleoproteins A2/B1 OS=Homo sapiens OX=9606 GN=HNRNP2B1 PE=1 SV=2                         | 27           | 122    | 8                 | 3.88E+07           | 3.97E+07           | 3.34E+07           | 3.71E+07           | 3.07E+07           | 3.67E+07           | 2.36E+07  | 2.36E+07   | 2.04E+07  | 2.11E+07  | 2.04E+07  | 1.85E+07  | 3.61E+07                 | 2.13E+07        | 1.70                           | 0.71                                         | 1.4672E-07  |
| P67775    | Serine/threonine-protein phosphatase 2A catalytic subunit alpha isoform OS=Homo sapiens OX=9606 GN=PPP2CA PE=1 SV=1  | 44           | 140    | 8                 | 5.45E+07           | 5.15E+07           | 4.01E+07           | 3.96E+07           | 4.75E+07           | 5.46E+07           | 5.02E+07  | 4.70E+07   | 3.50E+07  | 2.99E+07  | 3.59E+07  | 3.58E+07  | 4.80E+07                 | 3.90E+07        | 1.23                           | 0.30                                         | 0.060716714 |
| P30241    | Pro-mRNase L1 OS=Homo sapiens OX=9606 GN=PMR1 PE=1 SV=1                                                              | 10           | 245    | 7                 | 1.04E+07           | 1.34E+07           | 1.34E+07           | 1.71E+07           | 1.24E+07           | 1.24E+07           | 1.20E+07  | 1.27E+07   | 1.30E+07  | 1.19E+07  | 1.12E+07  | 1.75E+06  | 1.34E+07                 | 1.13E+07        | 0.24                           | 0.11                                         | 1.17469E-08 |
| Q93063    | Exostosin-2 OS=Homo sapiens OX=9606 GN=EXT2 PE=1 SV=1                                                                | 17           | 106    | 8                 | 1.48E+07           | 1.64E+07           | 1.52E+07           | 1.61E+07           | 1.31E+07           | 1.67E+07           | 5.85E+06  | 2.63E+07   | 2.37E+07  | 2.21E+07  | 2.28E+07  | 2.55E+07  | 1.54E+07                 | 2.58E+07        | 0.74                           | 0.30                                         | 0.67022E-05 |
| P18823    | Inter-alpha-trypsin inhibitor heavy chain H2 OS=Homo sapiens OX=9606 GN=IH2H2 PE=1 SV=2                              | 9            | 416    | 8                 | 2.90E+08           | 3.31E+08           | 3.31E+08           | 3.32E+08           | 3.85E+08           | 2.87E+08           | 4.20E+08  | 4.60E+08   | 5.65E+08  | 4.51E+08  | 5.07E+08  | 3.40E+08  | 3.26E+08                 | 4.57E+08        | 0.71                           | 0.49                                         | 0.00655964  |
| P08582    | Melanotransferin OS=Homo sapiens OX=9606 GN=MELTF PE=1 SV=2                                                          | 18           | 115    | 8                 | 2.63E+07           | 2.31E+07           | 2.64E+07           | 2.30E+07           | 2.08E+07           | 2.10E+07           | 1.47E+07  | 1.13E+07   | 1.31E+07  | 1.27E+07  | 1.18E+07  | 8.00E+06  | 2.34E+07                 | 1.19E+07        | 0.98                           | 0.99                                         | 7.58315E-06 |
| P17980    | 26S proteasome regulatory subunit 6A OS=Homo sapiens OX=9606 GN=PSMC3 PE=1 SV=3                                      | 22           | 141    | 8                 | 3.58E+07           | 3.22E+07           | 3.17E+07           | 2.99E+07           | 2.39E+07           | 3.26E+07           | 2.60E+07  | 2.33E+07   | 1.82E+07  | 1.38E+07  | 1.86E+07  | 1.65E+07  | 3.10E+07                 | 1.97E+07        | 1.57                           | 0.69                                         | 0.00888322  |
| P10108    | Anthraxin III OS=Homo sapiens OX=9606 GN=SERPNC1 PE=1 SV=1                                                           | 21           | 738    | 8                 | 5.84E+08           | 6.21E+08           | 7.02E+08           | 6.40E+08           | 6.61E+08           | 5.92E+08           | 7.41E+08  | 8.87E+08</ |           |           |           |           |                          |                 |                                |                                              |             |

Supplementary Table 4. List of all proteins identified by label free proteomics analysis.

| Accession | Description                                                                                            | Coverage [%] | IPSM46 | # Unique Peptides | Antitryptic1 | Antitryptic2 | Antitryptic3 | Antitryptic4 | Antitryptic5 | Antitryptic6 | Vehicle 1 | Vehicle 2 | Vehicle 3 | Vehicle 4 | Vehicle 5 | Vehicle 6 | Average antitryptic1 | Average vehicle | Ratio antitryptic1/vehicle | Log2 fold change (antitryptic1/vehicle) | P-value     |
|-----------|--------------------------------------------------------------------------------------------------------|--------------|--------|-------------------|--------------|--------------|--------------|--------------|--------------|--------------|-----------|-----------|-----------|-----------|-----------|-----------|----------------------|-----------------|----------------------------|-----------------------------------------|-------------|
| Q9NSD9    | Pharyngalysine-rRNA ligase beta subunit OS=Homo sapiens OX=9606 GN=FRSFB PE=1 SV=3                     | 18           | 72     | 9                 | 1.68E+07     | 1.59E+07     | 1.80E+07     | 2.25E+07     | 1.52E+07     | 2.04E+07     | 1.42E+07  | 1.35E+07  | 1.15E+07  | 1.41E+07  | 1.30E+07  | 1.37E+07  | 1.81E+07             | 1.34E+07        | 1.35                       | 0.4                                     | 0.008214467 |
| Q04637    | Eukaryotic translation initiation factor 4 gamma 1 OS=Homo sapiens OX=9606 GN=EIF4G1 PE=1 SV=4         | 8            | 76     | 9                 | 2.43E+07     | 2.43E+07     | 2.50E+07     | 2.50E+07     | 2.11E+07     | 1.08E+07     | 1.20E+07  | 1.09E+07  | 1.02E+07  | 1.07E+07  | 1.07E+07  | 9.81E+06  | 2.33E+07             | 1.13E+07        | 1.05                       | 4.1                                     | 4.192E-08   |
| Q07955    | Serine/arginine-rich splicing factor 1 OS=Homo sapiens OX=9606 GN=SRSF1 PE=1 SV=2                      | 3            | 68     | 9                 | 1.62E+07     | 1.55E+07     | 1.62E+07     | 1.71E+07     | 1.48E+07     | 1.57E+07     | 1.52E+07  | 1.58E+07  | 1.45E+07  | 1.40E+07  | 1.29E+07  | 1.32E+07  | 1.59E+07             | 1.43E+07        | 1.12                       | 0.16                                    | 0.016194833 |
| Q9YV69    | Cytosolic dynein 1 light intermediate chain 1 OS=Homo sapiens OX=9606 GN=DYNC1L1 PE=1 SV=3             | 22           | 47     | 9                 | 8.72E+07     | 8.2E+07      | 8.82E+07     | 8.81E+07     | 9.80E+07     | 8.93E+07     | 9.47E+07  | 1.11E+08  | 9.29E+07  | 1.12E+08  | 9.19E+07  | 7.83E+07  | 8.89E+07             | 9.68E+07        | 0.92                       | -0.12                                   | 0.205672623 |
| P04439    | HLA class I histocompatibility antigen, A alpha chain OS=Homo sapiens OX=9606 GN=HLA-A PE=1 SV=2       | 52           | 728    | 10                | 3.40E+08     | 3.67E+08     | 3.35E+08     | 3.67E+08     | 3.49E+08     | 3.25E+08     | 2.03E+08  | 2.21E+08  | 1.95E+08  | 2.14E+08  | 1.88E+08  | 1.74E+08  | 3.52E+08             | 1.99E+08        | 1.77                       | 0.62                                    | 2.0783E-08  |
| P53103    | 14-3-3 protein zeta/delta OS=Homo sapiens OX=9606 GN=PPP1R12 PE=1 SV=2                                 | 20           | 216    | 10                | 3.85E+07     | 3.85E+07     | 3.85E+07     | 3.85E+07     | 3.85E+07     | 4.43E+07     | 3.85E+07  | 4.39E+07  | 3.85E+07  | 4.39E+07  | 3.85E+07  | 4.16E+07  | 4.33E+07             | 3.85E+07        | 1.07                       | 0.08                                    | 0.326398307 |
| Q04307    | Alfa-actinin-4 OS=Homo sapiens OX=9606 GN=ACTN1 PE=1 SV=2                                              | 23           | 198    | 10                | 2.85E+07     | 2.46E+07     | 1.98E+07     | 2.32E+07     | 2.10E+07     | 2.21E+07     | 2.46E+07  | 2.07E+07  | 1.94E+07  | 1.82E+07  | 1.75E+07  | 1.69E+07  | 2.29E+07             | 1.95E+07        | 0.82                       | 2.0                                     | 0.063512393 |
| Q16181    | Septin-7 OS=Homo sapiens OX=9606 GN=SEPTIN7 PE=1 SV=2                                                  | 29           | 139    | 10                | 3.77E+07     | 2.80E+07     | 3.42E+07     | 3.22E+07     | 3.11E+07     | 3.62E+07     | 3.98E+07  | 3.01E+07  | 3.23E+07  | 2.72E+07  | 2.72E+07  | 2.99E+07  | 3.32E+07             | 3.11E+07        | 1.07                       | 0.10                                    | 0.398713546 |
| Q75533    | Splicing factor 3B subunit 1 OS=Homo sapiens OX=9606 GN=SF3B1 PE=1 SV=3                                | 14           | 121    | 10                | 2.24E+07     | 2.11E+07     | 2.33E+07     | 2.28E+07     | 2.29E+07     | 2.54E+07     | 1.99E+07  | 1.88E+07  | 1.24E+07  | 1.35E+07  | 1.72E+07  | 1.36E+07  | 2.30E+07             | 1.57E+07        | 0.43                       | 0.001566099                             |             |
| O15371    | Eukaryotic translation initiation factor 3 subunit 3 OS=Homo sapiens OX=9606 GN=EIF3D PE=1 SV=1        | 28           | 105    | 10                | 2.09E+07     | 1.66E+07     | 2.64E+07     | 1.69E+07     | 2.56E+07     | 2.82E+07     | 9.59E+06  | 9.56E+06  | 1.41E+07  | 7.48E+06  | 1.49E+07  | 1.42E+07  | 2.25E+07             | 1.16E+07        | 0.95                       | 0.001958966                             |             |
| P41091    | Eukaryotic translation initiation factor 2 subunit 3 OS=Homo sapiens OX=9606 GN=EIF2S3 PE=1 SV=3       | 37           | 128    | 10                | 3.39E+07     | 3.87E+07     | 3.39E+07     | 3.80E+07     | 3.54E+07     | 3.75E+07     | 2.79E+07  | 2.89E+07  | 2.38E+07  | 2.64E+07  | 2.73E+07  | 2.59E+07  | 3.62E+07             | 2.66E+07        | 1.36                       | 0.44                                    | 7.93919E-06 |
| Q9BLU2    | Cell surface glycoprotein MUC1 OS=Homo sapiens OX=9606 GN=MUC1 PE=1 SV=2                               | 24           | 106    | 10                | 2.78E+07     | 2.78E+07     | 3.18E+07     | 2.78E+07     | 2.78E+07     | 2.78E+07     | 2.78E+07  | 2.78E+07  | 2.78E+07  | 2.78E+07  | 2.78E+07  | 2.78E+07  | 2.78E+07             | 2.78E+07        | 2.20                       | 0.00                                    | 1.33E+07    |
| Q9B2U2    | Heterogeneous nuclear ribonucleoprotein U-like protein 1 OS=Homo sapiens OX=9606 GN=HNRNPUL1 PE=1 SV=2 | 22           | 73     | 10                | 2.09E+07     | 1.55E+07     | 1.95E+07     | 2.32E+07     | 2.42E+07     | 2.04E+07     | 1.75E+07  | 1.09E+07  | 1.04E+07  | 1.24E+07  | 9.57E+06  | 8.70E+06  | 2.06E+07             | 1.16E+07        | 1.78                       | 0.83                                    | 0.000525162 |
| Q02878    | 60S ribosomal protein L6 OS=Homo sapiens OX=9606 GN=RPL6 PE=1 SV=3                                     | 42           | 185    | 10                | 9.32E+07     | 9.0E+07      | 7.39E+07     | 6.28E+07     | 7.31E+07     | 6.57E+07     | 5.74E+07  | 5.36E+07  | 4.93E+07  | 4.22E+07  | 4.92E+07  | 3.67E+07  | 7.66E+07             | 4.81E+07        | 0.67                       | 0.001378615                             |             |
| P26599    | Poly(rimidine) tract-binding protein 1 OS=Homo sapiens OX=9606 GN=PTBP1 PE=1 SV=1                      | 28           | 126    | 10                | 3.28E+07     | 3.04E+07     | 2.67E+07     | 3.01E+07     | 2.80E+07     | 3.16E+07     | 2.33E+07  | 2.15E+07  | 1.77E+07  | 1.83E+07  | 1.80E+07  | 1.38E+07  | 2.99E+07             | 1.88E+07        | 0.7                        | 7.6072E-05                              |             |
| PE1978    | Heterogeneous nuclear ribonucleoprotein K OS=Homo sapiens OX=9606 GN=HNRNP K PE=1 SV=1                 | 28           | 161    | 10                | 7.59E+07     | 8.44E+07     | 7.77E+07     | 7.31E+07     | 7.04E+07     | 7.33E+07     | 4.64E+07  | 5.21E+07  | 4.07E+07  | 4.36E+07  | 4.11E+07  | 3.97E+07  | 4.46E+07             | 4.40E+07        | 1.72                       | 0.79                                    | 4.3559E-07  |
| Q16631    | DNA damage-binding protein 1 OS=Homo sapiens OX=9606 GN=DDIT3 PE=1 SV=1                                | 14           | 105    | 10                | 3.41E+07     | 3.71E+07     | 2.40E+07     | 2.46E+07     | 2.52E+07     | 2.33E+07     | 2.37E+07  | 2.19E+07  | 1.60E+07  | 1.73E+07  | 1.79E+07  | 1.74E+07  | 2.81E+07             | 1.90E+07        | 1.46                       | 0.56                                    | 0.01134477  |
| P14865    | Heterogeneous nuclear ribonucleoprotein 1 OS=Homo sapiens OX=9606 GN=HNRNP L1 PE=1 SV=2                | 26           | 78     | 10                | 2.48E+07     | 2.29E+07     | 1.98E+07     | 1.98E+07     | 1.99E+07     | 1.99E+07     | 1.99E+07  | 1.99E+07  | 1.22E+07  | 1.21E+07  | 1.14E+07  | 6.79E+06  | 2.22E+07             | 1.11E+07        | 2.00                       | 0.67                                    | 3.65452E-05 |
| O00571    | ATP-dependent RNA helicase DDX3X OS=Homo sapiens OX=9606 GN=DDX3X PE=1 SV=3                            | 20           | 96     | 10                | 2.64E+07     | 2.56E+07     | 2.61E+07     | 2.49E+07     | 1.99E+07     | 2.53E+07     | 2.81E+07  | 1.92E+07  | 1.55E+07  | 1.28E+07  | 1.63E+07  | 1.14E+07  | 2.48E+07             | 1.55E+07        | 1.59                       | 0.67                                    | 0.000212078 |
| P22087    | RNA 2'-O-methyltransferase fibrillarin OS=Homo sapiens OX=9606 GN=FBL PE=1 SV=2                        | 41           | 127    | 10                | 3.48E+07     | 3.73E+07     | 3.76E+07     | 3.30E+07     | 3.77E+07     | 3.88E+07     | 2.55E+07  | 2.71E+07  | 2.09E+07  | 2.20E+07  | 1.90E+07  | 2.09E+07  | 3.65E+07             | 2.26E+07        | 1.62                       | 0.69                                    | 5.82681E-06 |
| P53618    | Coatomer subunit beta OS=Homo sapiens OX=9606 GN=COPB1 PE=1 SV=3                                       | 17           | 90     | 10                | 2.82E+07     | 3.15E+07     | 3.62E+07     | 2.66E+07     | 4.54E+07     | 3.74E+07     | 1.98E+07  | 2.07E+07  | 2.41E+07  | 1.85E+07  | 1.99E+07  | 1.61E+07  | 3.42E+07             | 2.05E+07        | 1.73                       | 0.79                                    | 0.002403435 |
| Q15582    | Transforming growth factor-beta-induced protein in hi OS=Homo sapiens OX=9606 GN=TGFB1 PE=1 SV=1       | 19           | 94     | 10                | 1.63E+07     | 1.66E+07     | 2.40E+07     | 2.19E+07     | 2.22E+07     | 2.39E+07     | 3.79E+07  | 2.42E+07  | 3.34E+07  | 3.04E+07  | 3.88E+07  | 3.80E+07  | 2.08E+07             | 3.38E+07        | 0.62                       | 0.00131446                              |             |
| Q9N7K3    | Obg-like ATPase 1 OS=Homo sapiens OX=9606 GN=OLA1 PE=1 SV=2                                            | 18           | 93     | 10                | 3.21E+07     | 3.01E+07     | 2.74E+07     | 2.57E+07     | 2.70E+07     | 3.58E+07     | 3.67E+07  | 3.37E+07  | 3.18E+07  | 2.90E+07  | 3.38E+07  | 3.90E+07  | 2.89E+07             | 3.02E+07        | -0.09                      | -0.07                                   | 0.000000000 |
| Q09845    | FACT complex subunit SRB1 OS=Homo sapiens OX=9606 GN=SRB1 PE=1 SV=1                                    | 28           | 146    | 10                | 3.89E+07     | 3.89E+07     | 2.07E+07     | 2.07E+07     | 2.07E+07     | 2.07E+07     | 2.07E+07  | 2.07E+07  | 2.07E+07  | 2.07E+07  | 2.07E+07  | 2.07E+07  | 2.07E+07             | 2.07E+07        | 1.89                       | 0.59                                    | 0.50391E-05 |
| Q92616    | WIP-2 alpha kinase activator GCN1 OS=Homo sapiens OX=9606 GN=GCN1 PE=1 SV=6                            | 6            | 45     | 10                | 3.90E+07     | 3.54E+07     | 3.28E+07     | 2.19E+07     | 3.93E+07     | 3.02E+07     | 3.42E+07  | 3.87E+07  | 3.93E+07  | 2.11E+07  | 3.84E+07  | 3.88E+07  | 3.22E+07             | 3.17E+07        | 1.01                       | 0.02                                    | 0.919279436 |
| Q16610    | Extracellular matrix protein 1 OS=Homo sapiens OX=9606 GN=ECM1 PE=1 SV=2                               | 28           | 28     | 10                | 4.92E+06     | 4.40E+06     | 1.29E+06     | 3.02E+06     | 1.36E+06     | 3.21E+06     | 1.45E+06  | 4.69E+06  | 6.20E+06  | 1.45E+06  | 5.83E+06  | 5.81E+06  | 3.03E+06             | 1.62E+07        | -2.42                      | 0.10                                    | 1.31775E97  |
| P27994    | Transcriptin protein A 70 kDa DNA-binding subunit OS=Homo sapiens OX=9606 GN=RNAP1 PE=1 SV=2           | 24           | 94     | 10                | 3.02E+07     | 3.12E+07     | 2.30E+07     | 2.59E+07     | 2.36E+07     | 3.01E+07     | 2.28E+07  | 2.38E+07  | 1.84E+07  | 1.73E+07  | 1.66E+07  | 1.52E+07  | 2.77E+07             | 1.91E+07        | 1.44                       | 0.53                                    | 0.003868654 |
| Q92849    | 40S ribosomal protein S16 OS=Homo sapiens OX=9606 GN=RPS16 PE=1 SV=2                                   | 49           | 420    | 10                | 1.68E+08     | 1.79E+08     | 1.57E+08     | 1.58E+08     | 1.52E+08     | 1.47E+08     | 1.23E+08  | 1.27E+08  | 1.02E+08  | 1.06E+08  | 1.14E+08  | 1.03E+08  | 1.60E+08             | 1.12E+08        | 0.50                       | 0.00                                    | 1.45359E-05 |
| P42100    | Nicotinamide phosphoribosyltransferase OS=Homo sapiens OX=9606 GN=NAMPT PE=1 SV=1                      | 30           | 77     | 10                | 2.65E+07     | 2.65E+07     | 2.70E+07     | 2.76E+07     | 2.76E+07     | 2.76E+07     | 2.44E+07  | 2.02E+07  | 1.90E+07  | 2.02E+07  | 2.24E+07  | 1.59E+07  | 2.89E+07             | 2.02E+07        | 1.53                       | 0.29                                    | 0.001868868 |
| P35573    | Glycogen debranching enzyme OS=Homo sapiens OX=9606 GN=GBL PE=1 SV=1                                   | 9            | 139    | 10                | 8.87E+07     | 2.82E+07     | 2.23E+07     | 2.07E+07     | 1.97E+07     | 2.48E+07     | 3.69E+07  | 3.59E+07  | 2.96E+07  | 3.66E+07  | 3.66E+07  | 3.66E+07  | 4.31E+07             | 3.08E+07        | 0.75                       | 0.00                                    | 0.197953663 |
| O60763    | General vesicular transport factor p115 OS=Homo sapiens OX=9606 GN=USO3 PE=1 SV=1                      | 11           | 94     | 10                | 2.97E+07     | 9.47E+07     | 1.34E+08     | 1.54E+08     | 1.55E+08     | 1.21E+08     | 1.33E+08  | 1.22E+08  | 1.88E+08  | 1.68E+08  | 1.38E+08  | 1.19E+08  | 1.25E+08             | 1.45E+08        | 0.86                       | -0.21                                   | 0.244434148 |
| P22102    | Trifunctional purine biosynthetic protein adenosine-3 OS=Homo sapiens OX=9606 GN=GART PE=1 SV=1        | 16           | 60     | 10                | 2.28E+07     | 2.67E+07     | 2.14E+07     | 2.88E+07     | 2.37E+07     | 2.06E+07     | 1.44E+07  | 1.62E+07  | 1.36E+07  | 1.55E+07  | 1.19E+07  | 1.07E+07  | 2.40E+07             | 1.37E+07        | 0.80                       | 0.00                                    | 0.000120978 |
| O00429    | Dynamitin-1 like protein OS=Homo sapiens OX=9606 GN=DNM1L PE=1 SV=2                                    | 19           | 81     | 10                | 1.56E+07     | 2.01E+07     | 1.72E+07     | 1.49E+07     | 1.72E+07     | 1.56E+07     | 1.48E+07  | 1.78E+07  | 1.41E+07  | 1.88E+07  | 1.30E+07  | 1.68E+07  | 1.55E+07             | 1.57E+07        | 1.08                       | 0.11                                    | 0.316199479 |
| P20774    | Mimcain OS=Homo sapiens OX=9606 GN=OGN PE=1 SV=1                                                       | 27           | 295    | 10                | 1.03E+08     | 9.22E+07     | 9.30E+07     | 1.29E+08     | 1.11E+08     | 9.77E+07     | 1.46E+08  | 1.28E+08  | 1.27E+08  | 1.42E+08  | 1.29E+08  | 1.17E+08  | 1.04E+08             | 1.32E+08        | -0.35                      | 0.00                                    | 0.001925452 |
| P19105    | Vinculin OS=Homo sapiens OX=9606 GN=VCL PE=1 SV=1                                                      | 22           | 84     | 10                | 2.79E+07     | 2.79E+07     | 2.19E+07     | 2.19E+07     | 2.19E+07     | 2.79E+07     | 3.10E+07  | 2.94E+07  | 3.45E+07  | 3.17E+07  | 3.14E+07  | 3.55E+07  | 3.14E+07             | 3.45E+07        | 0.22                       | 0.00                                    | 0.139781974 |
| Q9LUN7    | Sorting nexin-6 OS=Homo sapiens OX=9606 GN=SNX6 PE=1 SV=1                                              | 22           | 64     | 10                | 1.76E+07     | 2.24E+07     | 2.11E+07     | 2.02E+07     | 1.92E+07     | 1.82E+07     | 1.57E+07  | 1.89E+07  | 1.78E+07  | 1.45E+07  | 1.79E+07  | 1.78E+07  | 1.99E+07             | 1.71E+07        | 1.16                       | 0.22                                    | 0.018173079 |
| P08779    | Keratin, type I cytoskeletal 16 OS=Homo sapiens OX=9606 GN=KRT16 PE=1 SV=4                             | 53           | 480    | 10                | 1.66E+08     | 7.54E+07     | 4.25E+07     | 5.44E+07     | 4.59E+07     | 1.39E+08     | 9.02E+07  | 1.66E+08  | 8.20E+07  | 9.51E+07  | 5.68E+07  | 3.56E+07  | 8.72E+07             | 7.59E+07        | 1.15                       | 0.20                                    | 0.715868387 |
| P06748    | Nucleophosmin OS=Homo sapiens OX=9606 GN=NPM1 PE=1 SV=2                                                | 38           | 225    | 10                | 1.21E+08     | 1.30E+08     | 1.53E+08     | 1.42E+08     | 1.36E+08     | 1.55E+08     | 2.00E+07  | 8.84E+07  | 9.02E+07  | 6.97E+07  | 7.51E+07  | 7.11E+07  | 1.39E+08             | 8.08E+07        | 0.79                       | 0.83                                    | 8.36565E-06 |
| P16401    | Histone H1.5 OS=Homo sapiens OX=9606 GN=H1-5 PE=1 SV=3                                                 | 36           | 739    | 10                | 8.61E+08     | 8.83E+08     | 8.83E+08     | 8.83E+08     | 8.83E+08     | 8.12E+08     | 7         |           |           |           |           |           |                      |                 |                            |                                         |             |

# Supplementary Table 4. List of all proteins identified by label free proteomics analysis.

| Accession | Description                                                                                               | Coverage [%] | # PSMs | # Unique Peptides | Antitriptyline 1 | Antitriptyline 2 | Antitriptyline 3 | Antitriptyline 4 | Antitriptyline 5 | Antitriptyline 6 | Vehicle 1 | Vehicle 2 | Vehicle 3 | Vehicle 4 | Vehicle 5 | Vehicle 6 | Average antitriptyline | Average vehicle | Ratio antitriptyline/vehicle | Log 2 fold change (antitriptyline/vehicle) | P-value |
|-----------|-----------------------------------------------------------------------------------------------------------|--------------|--------|-------------------|------------------|------------------|------------------|------------------|------------------|------------------|-----------|-----------|-----------|-----------|-----------|-----------|------------------------|-----------------|------------------------------|--------------------------------------------|---------|
| Q9Y30     | RNA-splicing ligase RtcB homolog OS=Homo sapiens OX=9606 GN=RTCB PE=1 SV=1                                | 39           | 174    | 13                | 4.43E+07         | 4.57E+07         | 4.55E+07         | 4.29E+07         | 3.63E+07         | 4.20E+07         | 3.60E+07  | 3.78E+07  | 3.16E+07  | 2.88E+07  | 3.30E+07  | 2.99E+07  | 4.28E+07               | 4.28E+07        | 1.00                         | 0.000582775                                | 0.39    |
| O00622    | CCN family member 1 OS=Homo sapiens OX=9606 GN=CCN1 PE=1 SV=1                                             | 36           | 309    | 13                | 6.61E+07         | 5.16E+07         | 5.93E+07         | 6.32E+07         | 6.69E+07         | 6.31E+07         | 1.39E+08  | 1.39E+08  | 1.38E+08  | 1.49E+08  | 1.14E+08  | 1.28E+08  | 6.17E+07               | 1.35E+08        | 0.46                         | 1.28282E-06                                | -1.13   |
| O95373    | Importin-7 OS=Homo sapiens OX=9606 GN=IPO7 PE=1 SV=1                                                      | 17           | 108    | 13                | 2.98E+07         | 3.47E+07         | 2.87E+07         | 2.90E+07         | 3.48E+07         | 3.36E+07         | 2.41E+07  | 1.89E+07  | 2.26E+07  | 1.96E+07  | 2.61E+07  | 2.17E+07  | 3.18E+07               | 2.22E+07        | 1.43                         | 0.001494878                                | 0.52    |
| O00231    | 26S proteasome non-ATPase regulatory subunit 11 OS=Homo sapiens OX=9606 GN=PSMD11 PE=1 SV=3               | 44           | 282    | 13                | 5.86E+07         | 5.65E+07         | 5.48E+07         | 5.72E+07         | 5.47E+07         | 5.32E+07         | 2.87E+07  | 4.10E+07  | 3.80E+07  | 3.92E+07  | 3.78E+07  | 3.19E+07  | 5.55E+07               | 4.44E+07        | 1.25                         | 0.017186633                                | 0.25    |
| Q15033    | Peromysc-Homo sapiens OX=9606 GN=POSTN PE=1 SV=2                                                          | 19           | 144    | 13                | 3.81E+07         | 3.22E+07         | 3.30E+07         | 2.89E+07         | 2.73E+07         | 3.27E+07         | 5.11E+07  | 4.86E+07  | 3.23E+07  | 3.92E+07  | 4.29E+07  | 3.78E+07  | 3.19E+07               | 4.20E+07        | 0.76                         | 0.153545311                                | -0.40   |
| P05768    | 60S ribosomal non-ATPase regulatory subunit 10A OS=Homo sapiens OX=9606 GN=PSMD10 PE=1 SV=2               | 21           | 166    | 13                | 3.79E+07         | 3.49E+07         | 3.50E+07         | 3.49E+07         | 3.49E+07         | 3.49E+07         | 4.78E+07  | 4.78E+07  | 4.78E+07  | 4.78E+07  | 4.78E+07  | 4.78E+07  | 4.78E+07               | 4.78E+07        | 1.00                         | 0.000219193                                | 0.51    |
| P55786    | Purothionin-sensitive aminopeptidase OS=Homo sapiens OX=9606 GN=NPPEPS PE=1 SV=2                          | 19           | 148    | 13                | 3.87E+07         | 4.96E+07         | 3.77E+07         | 4.32E+07         | 3.72E+07         | 4.45E+07         | 4.48E+07  | 4.57E+07  | 4.64E+07  | 4.05E+07  | 4.73E+07  | 3.96E+07  | 4.22E+07               | 4.40E+07        | -0.40                        | 0.430260256                                | -0.40   |
| P12429    | Annexin A3 OS=Homo sapiens OX=9606 GN=ANXA3 PE=1 SV=3                                                     | 44           | 233    | 13                | 7.70E+07         | 7.38E+07         | 6.16E+07         | 6.67E+07         | 7.53E+07         | 6.37E+07         | 6.64E+07  | 6.68E+07  | 6.38E+07  | 5.80E+07  | 5.76E+07  | 4.89E+07  | 6.97E+07               | 6.03E+07        | 1.16                         | 0.21035041928                              | 0.21    |
| Q9Y230    | RuvB-like 2 OS=Homo sapiens OX=9606 GN=RUVBL2 PE=1 SV=3                                                   | 30           | 152    | 13                | 4.60E+07         | 4.63E+07         | 4.38E+07         | 4.80E+07         | 4.80E+07         | 4.38E+07         | 3.20E+07  | 2.90E+07  | 3.15E+07  | 2.89E+07  | 2.48E+07  | 4.64E+07  | 2.97E+07               | 1.16            | 0.6478941E+07                | 0.64                                       |         |
| Q8BLX7    | Fermitin family homolog 3 OS=Homo sapiens OX=9606 GN=FERMT3 PE=1 SV=1                                     | 22           | 216    | 13                | 5.85E+07         | 6.21E+07         | 5.95E+07         | 6.33E+07         | 5.82E+07         | 5.49E+07         | 4.80E+07  | 7.88E+07  | 7.89E+07  | 7.94E+07  | 7.93E+07  | 7.97E+07  | 5.91E+07               | 7.98E+07        | 1.00                         | 5.14872E-07                                | 0.74    |
| P06228    | Eukaryotic translation initiation factor 3 subunit E OS=Homo sapiens OX=9606 GN=EIF3E PE=1 SV=1           | 35           | 209    | 13                | 5.87E+07         | 6.31E+07         | 6.35E+07         | 6.71E+07         | 6.77E+07         | 5.83E+07         | 8.41E+07  | 8.88E+07  | 4.52E+07  | 4.42E+07  | 4.50E+07  | 4.00E+07  | 6.31E+07               | 4.32E+07        | 1.46                         | 0.61537E-06                                | 1.46    |
| Q14974    | Importin subunit beta-1 OS=Homo sapiens OX=9606 GN=KPN1B1 PE=1 SV=2                                       | 24           | 168    | 13                | 4.81E+07         | 4.32E+07         | 4.32E+07         | 4.32E+07         | 4.32E+07         | 2.81E+07         | 2.81E+07  | 2.81E+07  | 2.81E+07  | 2.81E+07  | 2.81E+07  | 2.81E+07  | 2.81E+07               | 2.81E+07        | 1.00                         | 7.01917E-06                                | 0.48    |
| P39023    | 60S ribosomal protein L3 OS=Homo sapiens OX=9606 GN=RPL3 PE=1 SV=2                                        | 43           | 274    | 14                | 1.15E+08         | 1.15E+08         | 1.16E+08         | 1.11E+08         | 1.11E+08         | 1.11E+08         | 1.11E+08  | 1.11E+08  | 1.11E+08  | 1.11E+08  | 1.11E+08  | 1.11E+08  | 1.11E+08               | 1.11E+08        | 1.00                         | 1.36959E-06                                | 0.56    |
| P11021    | Endoplasmic reticulum chaperone BiP OS=Homo sapiens OX=9606 GN=HSPA5 PE=1 SV=2                            | 31           | 323    | 14                | 4.66E+07         | 4.68E+07         | 4.07E+07         | 3.68E+07         | 3.89E+07         | 3.58E+07         | 4.08E+07  | 3.79E+07  | 2.87E+07  | 3.07E+07  | 2.97E+07  | 3.20E+07  | 4.09E+07               | 3.33E+07        | 1.23                         | 0.021029202                                | 0.30    |
| P06493    | Cyclin-dependent kinase 1 OS=Homo sapiens OX=9606 GN=CDK1 PE=1 SV=3                                       | 56           | 238    | 14                | 8.99E+07         | 9.42E+07         | 8.03E+07         | 8.18E+07         | 9.00E+07         | 8.91E+07         | 4.63E+07  | 5.46E+07  | 4.57E+07  | 4.38E+07  | 5.08E+07  | 4.92E+07  | 8.75E+07               | 4.84E+07        | 1.81                         | 1.3434E-07                                 | 0.85    |
| P02753    | 60S ribosomal protein S1 OS=Homo sapiens OX=9606 GN=PSO1 PE=1 SV=1                                        | 40           | 305    | 14                | 1.64E+07         | 1.61E+08         | 1.31E+08         | 1.36E+08         | 1.22E+08         | 1.37E+08         | 7.79E+07  | 9.17E+07  | 6.42E+07  | 3.97E+07  | 6.74E+07  | 6.11E+07  | 1.38E+08               | 7.37E+07        | 1.88                         | 1.80894E-06                                | 1.88    |
| P50960    | Exportin-2 OS=Homo sapiens OX=9606 GN=OSE1L PE=1 SV=1                                                     | 22           | 168    | 14                | 4.81E+07         | 4.32E+07         | 4.32E+07         | 4.32E+07         | 4.32E+07         | 5.06E+07         | 4.75E+07  | 3.39E+07  | 3.00E+07  | 3.48E+07  | 3.39E+07  | 2.71E+07  | 4.70E+07               | 3.22E+07        | 1.54                         | 3.9912E-07                                 | 0.46    |
| P20591    | Interferon-induced GTP-binding protein M1 OS=Homo sapiens OX=9606 GN=MX1 PE=1 SV=4                        | 32           | 182    | 14                | 6.06E+07         | 5.34E+07         | 5.73E+07         | 5.24E+07         | 4.74E+07         | 5.23E+07         | 2.31E+07  | 2.32E+07  | 2.02E+07  | 1.88E+07  | 1.76E+07  | 2.21E+07  | 5.39E+07               | 2.08E+07        | 2.59                         | 0.1142E+07                                 | 1.97    |
| P46777    | 60S ribosomal protein L5 OS=Homo sapiens OX=9606 GN=RPL5 PE=1 SV=3                                        | 47           | 322    | 14                | 1.86E+08         | 1.61E+08         | 1.38E+08         | 1.51E+08         | 1.49E+08         | 1.48E+08         | 1.31E+08  | 1.11E+08  | 0.96E+08  | 1.02E+08  | 0.94E+08  | 0.82E+08  | 1.56E+08               | 1.00E+08        | 1.52                         | 4.83677E-05                                | 1.44    |
| Q9H223    | EH domain-containing protein 4 OS=Homo sapiens OX=9606 GN=EHD4 PE=1 SV=1                                  | 42           | 198    | 14                | 5.51E+07         | 5.49E+07         | 4.75E+07         | 4.87E+07         | 4.77E+07         | 4.95E+07         | 1.39E+07  | 4.00E+07  | 3.70E+07  | 3.09E+07  | 3.21E+07  | 3.49E+07  | 5.05E+07               | 3.57E+07        | 1.45                         | 0.623792E-05                               | 0.60    |
| P38606    | N-type protein tyrosine kinase catalytic subunit A OS=Homo sapiens OX=9606 GN=PTP61A PE=1 SV=2            | 38           | 145    | 14                | 3.11E+07         | 3.34E+07         | 3.46E+07         | 3.17E+07         | 2.93E+07         | 3.07E+07         | 3.43E+07  | 3.31E+07  | 3.03E+07  | 2.71E+07  | 3.14E+07  | 2.87E+07  | 3.18E+07               | 3.06E+07        | 1.00                         | 0.423305356                                | 0.86    |
| Q02026    | Peroxidase homolog OS=Homo sapiens OX=9606 GN=PXND1 PE=1 SV=2                                             | 15           | 126    | 14                | 6.81E+07         | 1.84E+07         | 1.57E+07         | 1.02E+07         | 1.69E+07         | 1.84E+07         | 3.97E+07  | 2.93E+07  | 2.76E+07  | 2.46E+07  | 3.10E+07  | 2.61E+07  | 1.67E+07               | 2.91E+07        | -0.80                        | 0.016569565                                | -0.80   |
| O00413    | Importin-5 OS=Homo sapiens OX=9606 GN=IPO5 PE=1 SV=1                                                      | 12           | 136    | 14                | 3.61E+07         | 3.60E+07         | 3.72E+07         | 3.72E+07         | 3.72E+07         | 2.81E+07         | 2.81E+07  | 2.81E+07  | 2.81E+07  | 2.81E+07  | 2.81E+07  | 2.81E+07  | 2.81E+07               | 2.81E+07        | 1.00                         | 0.002178917                                | 0.47    |
| P14625    | Endoplasmic reticulum OS=Homo sapiens OX=9606 GN=HSP90B1 PE=1 SV=1                                        | 22           | 317    | 14                | 4.28E+07         | 4.22E+07         | 3.45E+07         | 4.00E+07         | 3.74E+07         | 3.51E+07         | 4.55E+07  | 4.58E+07  | 4.23E+07  | 4.56E+07  | 4.30E+07  | 3.85E+07  | 3.87E+07               | 4.35E+07        | 0.89                         | 1.02781294E-07                             | 0.89    |
| Q43854    | EGF-like repeat and discoidin-like domain-containing protein 3 OS=Homo sapiens OX=9606 GN=EDIL3 PE=1 SV=1 | 15           | 185    | 14                | 8.84E+07         | 9.20E+07         | 7.83E+07         | 9.00E+07         | 7.63E+07         | 8.93E+07         | 1.09E+08  | 1.12E+08  | 1.09E+08  | 1.15E+08  | 9.30E+07  | 8.98E+07  | 8.50E+07               | 1.05E+08        | -0.30                        | 0.041098281                                | -0.30   |
| P35998    | 26S proteasome regulatory subunit 7 OS=Homo sapiens OX=9606 GN=PSM22 PE=1 SV=3                            | 42           | 161    | 14                | 4.70E+07         | 4.55E+07         | 3.77E+07         | 4.42E+07         | 3.87E+07         | 3.77E+07         | 3.38E+07  | 2.94E+07  | 3.15E+07  | 3.09E+07  | 2.28E+07  | 1.94E+07  | 4.18E+07               | 2.80E+07        | 1.55                         | 0.000812550                                | 1.55    |
| Q55335    | Heterochromatin protein 1-binding protein 3 OS=Homo sapiens OX=9606 GN=HP1B3 PE=1 SV=1                    | 26           | 148    | 14                | 4.52E+07         | 4.14E+07         | 4.68E+07         | 4.68E+07         | 4.59E+07         | 4.16E+07         | 3.21E+07  | 3.06E+07  | 3.33E+07  | 3.32E+07  | 3.16E+07  | 2.17E+07  | 4.46E+07               | 3.04E+07        | 1.47                         | 0.000125267                                | 1.47    |
| P06280    | 40S ribosomal protein S11 OS=Homo sapiens OX=9606 GN=PSO11 PE=1 SV=3                                      | 63           | 350    | 15                | 1.70E+08         | 1.69E+08         | 1.69E+08         | 1.71E+08         | 1.75E+08         | 1.52E+08         | 1.99E+08  | 1.24E+08  | 1.24E+08  | 1.24E+08  | 1.11E+08  | 0.98E+08  | 1.08E+08               | 1.18E+08        | 1.43                         | 1.06456E-06                                | 1.43    |
| P11388    | DNA topoisomerase 2-alpha OS=Homo sapiens OX=9606 GN=TOP2A PE=1 SV=3                                      | 12           | 94     | 14                | 2.05E+07         | 2.18E+07         | 2.21E+07         | 2.14E+07         | 2.14E+07         | 1.91E+07         | 1.93E+07  | 1.37E+07  | 1.72E+07  | 1.63E+07  | 1.03E+07  | 8.15E+06  | 1.08E+07               | 1.54E+07        | 0.51                         | 0.006878621                                | 0.51    |
| P07942    | Laminin subunit beta-1 OS=Homo sapiens OX=9606 GN=LAMB1 PE=1 SV=2                                         | 10           | 133    | 14                | 2.07E+07         | 2.07E+07         | 2.27E+07         | 2.58E+07         | 2.45E+07         | 2.63E+07         | 3.64E+07  | 3.49E+07  | 3.43E+07  | 3.24E+07  | 3.62E+07  | 2.67E+07  | 2.47E+07               | 3.26E+07        | 0.76                         | 0.001423994                                | 0.76    |
| P62826    | GTP-binding nuclear protein Ran OS=Homo sapiens OX=9606 GN=RRN PE=1 SV=3                                  | 49           | 719    | 15                | 4.54E+08         | 5.14E+08         | 4.04E+08         | 4.17E+08         | 4.32E+08         | 4.24E+08         | 3.87E+08  | 4.25E+08  | 4.09E+08  | 4.25E+08  | 3.54E+08  | 3.14E+08  | 4.41E+08               | 3.74E+08        | 1.00                         | 0.0168344                                  | 1.00    |
| Q16555    | Dihydropyrimidinase-related protein 2 OS=Homo sapiens OX=9606 GN=HGPS2 PE=1 SV=1                          | 46           | 280    | 15                | 6.41E+07         | 6.79E+07         | 6.25E+07         | 5.95E+07         | 5.68E+07         | 6.28E+07         | 6.77E+07  | 7.12E+07  | 6.42E+07  | 6.42E+07  | 5.79E+07  | 5.96E+07  | 6.23E+07               | 6.52E+07        | 0.24                         | 0.318854339                                | 0.24    |
| P62241    | 60S ribosomal protein S8 OS=Homo sapiens OX=9606 GN=PSO8 PE=1 SV=2                                        | 60           | 828    | 15                | 3.14E+08         | 3.23E+08         | 3.38E+08         | 3.12E+08         | 3.21E+08         | 3.45E+08         | 2.09E+08  | 2.20E+08  | 1.95E+08  | 2.02E+08  | 1.98E+08  | 1.75E+08  | 3.25E+08               | 2.00E+08        | 1.62                         | 0.049199E-08                               | 1.62    |
| Q9Y242    | 60S ribosomal protein L7a OS=Homo sapiens OX=9606 GN=RPL7A PE=1 SV=1                                      | 36           | 167    | 15                | 3.14E+08         | 3.23E+08         | 3.38E+08         | 3.12E+08         | 3.21E+08         | 3.45E+08         | 2.09E+08  | 2.20E+08  | 1.95E+08  | 2.02E+08  | 1.98E+08  | 1.75E+08  | 3.25E+08               | 2.00E+08        | 1.62                         | 0.049199E-08                               | 1.62    |
| Q9NMZ1    | Myoferlin OS=Homo sapiens OX=9606 GN=MYOF PE=1 SV=1                                                       | 11           | 174    | 14                | 4.47E+07         | 4.29E+07         | 3.99E+07         | 4.10E+07         | 3.92E+07         | 3.94E+07         | 3.04E+07  | 2.42E+07  | 2.81E+07  | 2.69E+07  | 2.43E+07  | 2.10E+07  | 4.10E+07               | 2.58E+07        | 1.59                         | 0.772441E-06                               | 1.59    |
| Q9UHB9    | Signal recognition particle subunit SRP68 OS=Homo sapiens OX=9606 GN=SRP68 PE=1 SV=2                      | 32           | 198    | 15                | 4.23E+07         | 4.33E+07         | 3.87E+07         | 3.92E+07         | 3.53E+07         | 3.89E+07         | 2.15E+07  | 1.72E+07  | 1.62E+07  | 1.78E+07  | 1.78E+07  | 1.53E+07  | 3.96E+07               | 1.76E+07        | 2.24                         | 1.787930E-08                               | 2.24    |
| O75955    | Flotillin-1 OS=Homo sapiens OX=9606 GN=FLT1 PE=1 SV=3                                                     | 38           | 175    | 15                | 3.40E+07         | 3.62E+07         | 3.73E+07         | 4.10E+07         | 4.21E+07         | 3.79E+07         | 5.26E+07  | 5.08E+07  | 5.08E+07  | 4.42E+07  | 4.42E+07  | 4.49E+07  | 3.81E+07               | 4.99E+07        | -1.37                        | 7.60348E-05                                | -1.37   |
| O75891    | Cytosolic 10-formyltetrahydrofolate dehydrogenase OS=Homo sapiens OX=9606 GN=ALDH1L1 PE=1 SV=2            | 19           | 425    | 15                | 1.97E+08         | 2.08E+08         | 1.74E+08         | 1.85E+08         | 1.70E+08         | 1.63E+08         | 2.51E+08  | 2.65E+08  | 2.09E+08  | 2.38E+08  | 2.15E+08  | 2.03E+08  | 1.83E+08               | 2.30E+08        | 0.80                         | 0.00445169                                 | 0.80    |
| P28786    | Transferin receptor protein 1 OS=Homo sapiens OX=9606 GN=TFRC PE=1 SV=2                                   | 24           | 313    | 15                | 7.51E+07         | 7.97E+07         |                  |                  |                  |                  |           |           |           |           |           |           |                        |                 |                              |                                            |         |

**Supplementary Table 4. List of all proteins identified by label free proteomics analysis.**

| Accession | Description                                                                                                     | Coverage [%] | # PSMs | # Unique Peptides | Antitrypsine 1 | Antitrypsine 2 | Antitrypsine 3 | Antitrypsine 4 | Antitrypsine 5 | Antitrypsine 6 | Vehicle 1 | Vehicle 2 | Vehicle 3 | Vehicle 4 | Vehicle 5 | Vehicle 6 | Average antitrypsine | Average vehicle | Ratio antitrypsine/vehicle | Log 2 fold change (antitrypsine/vehicle) | P-value |
|-----------|-----------------------------------------------------------------------------------------------------------------|--------------|--------|-------------------|----------------|----------------|----------------|----------------|----------------|----------------|-----------|-----------|-----------|-----------|-----------|-----------|----------------------|-----------------|----------------------------|------------------------------------------|---------|
| Q8V6P6    | Cullin-associated NEDD8-dissociated protein 1 OS=Homo sapiens OX=9606 GN=CAND1 PE=1 SV=2                        | 24           | 316    | 21                | 9.30E+07       | 9.16E+07       | 8.84E+07       | 8.76E+07       | 8.37E+07       | 8.43E+07       | 9.53E+07  | 8.02E+07  | 6.96E+07  | 7.19E+07  | 6.46E+07  | 7.08E+07  | 8.78E+07             | 7.52E+07        | 1.17                       | 0.03856109                               |         |
| P35871    | Phosphoglucomutase 1 OS=Homo sapiens OX=9606 GN=PGM1 PE=1 SV=2                                                  | 50           | 249    | 21                | 1.18E+08       | 1.10E+08       | 1.18E+08       | 1.26E+08       | 1.25E+08       | 1.14E+08       | 1.57E+08  | 1.62E+08  | 1.49E+08  | 1.48E+08  | 1.37E+08  | 1.05E+08  | 1.07E+08             | 1.45E+08        | 0.82                       | -0.297021135                             |         |
| P08473    | Nephrilysin OS=Homo sapiens OX=9606 GN=NME PE=1 SV=2                                                            | 40           | 278    | 21                | 7.90E+07       | 7.78E+07       | 8.97E+07       | 8.40E+07       | 9.29E+07       | 8.00E+07       | 6.14E+07  | 5.84E+07  | 7.07E+07  | 8.06E+07  | 5.84E+07  | 4.12E+07  | 8.54E+07             | 6.18E+07        | 1.38                       | 0.005749762                              |         |
| Q9P2J5    | Leucine--rRNA ligase, cytoplasmic OS=Homo sapiens OX=9606 GN=LARS PE=1 SV=2                                     | 23           | 258    | 21                | 7.95E+07       | 7.32E+07       | 7.08E+07       | 6.19E+07       | 7.17E+07       | 6.54E+07       | 7.37E+07  | 4.23E+07  | 4.38E+07  | 4.18E+07  | 4.68E+07  | 3.68E+07  | 7.04E+07             | 4.34E+07        | 1.62                       | 0.470058705                              |         |
| Q57457    | E3 ubiquitin-protein ligase UBR4 OS=Homo sapiens OX=9606 GN=UBR4 PE=1 SV=1                                      | 7            | 102    | 21                | 2.18E+07       | 1.92E+07       | 2.20E+07       | 2.17E+07       | 2.23E+07       | 2.09E+07       | 1.63E+07  | 1.05E+07  | 1.34E+07  | 1.19E+07  | 1.42E+07  | 1.15E+07  | 2.13E+07             | 1.30E+07        | 1.65                       | 0.32881E-05                              |         |
| Q92366    | 116 kDa US small nuclear ribonucleoprotein component OS=Homo sapiens OX=9606 GN=U2ED2 PE=1 SV=1                 | 33           | 201    | 21                | 1.71E+08       | 1.81E+08       | 1.68E+08       | 1.47E+08       | 1.63E+08       | 1.63E+08       | 1.25E+08  | 1.34E+08  | 1.16E+08  | 1.21E+08  | 1.01E+08  | 1.62E+08  | 1.30E+08             | 1.62E+08        | 0.83                       | 0.002092621                              |         |
| Q15029    | 116 kDa US small nuclear ribonucleoprotein component OS=Homo sapiens OX=9606 GN=U2ED2 PE=1 SV=1                 | 33           | 201    | 21                | 5.50E+07       | 5.46E+07       | 5.29E+07       | 5.45E+07       | 5.85E+07       | 5.42E+07       | 3.82E+07  | 3.65E+07  | 3.86E+07  | 3.87E+07  | 4.25E+07  | 3.41E+07  | 5.49E+07             | 3.81E+07        | 1.44                       | 0.764209E-07                             |         |
| P08238    | Heat shock protein HSP 90-beta OS=Homo sapiens OX=9606 GN=HSP90AB1 PE=1 SV=4                                    | 52           | 1866   | 22                | 8.71E+08       | 9.37E+08       | 8.56E+08       | 8.81E+08       | 8.96E+08       | 8.14E+08       | 8.91E+08  | 9.15E+08  | 8.41E+08  | 8.06E+08  | 8.12E+08  | 7.02E+08  | 8.76E+08             | 8.28E+08        | 1.06                       | 0.206432937                              |         |
| P06737    | Glycogen phosphorylase, liver form OS=Homo sapiens OX=9606 GN=PYGL PE=1 SV=4                                    | 40           | 787    | 22                | 2.48E+08       | 2.43E+08       | 2.23E+08       | 2.25E+08       | 2.25E+08       | 2.26E+08       | 2.52E+08  | 2.53E+08  | 2.43E+08  | 2.24E+08  | 2.33E+08  | 1.95E+08  | 2.31E+08             | 2.33E+08        | 0.99                       | -0.834485045                             |         |
| P21399    | Cytosolic acconitate hydratase OS=Homo sapiens OX=9606 GN=ACO1 PE=1 SV=2                                        | 34           | 668    | 22                | 2.47E+08       | 2.44E+08       | 2.31E+08       | 2.36E+08       | 2.15E+08       | 2.33E+08       | 8.52E+08  | 3.18E+08  | 2.68E+08  | 2.66E+08  | 2.61E+08  | 2.51E+08  | 3.18E+08             | 3.69E+08        | 0.86                       | 0.264913113                              |         |
| P05023    | Sodium/potassium-transporting ATPase subunit alpha-1 OS=Homo sapiens OX=9606 GN=ATP1A1 PE=1 SV=1                | 26           | 335    | 22                | 1.31E+08       | 1.29E+08       | 1.21E+08       | 1.26E+08       | 1.24E+08       | 1.16E+08       | 1.02E+08  | 1.04E+08  | 9.44E+07  | 8.91E+07  | 8.88E+07  | 7.44E+07  | 1.24E+08             | 9.21E+07        | 1.35                       | 0.000273934                              |         |
| P35871    | Cotaster subunit beta OS=Homo sapiens OX=9606 GN=CB2 PE=1 SV=2                                                  | 39           | 231    | 22                | 6.22E+07       | 7.29E+07       | 5.98E+07       | 6.30E+07       | 6.16E+07       | 6.42E+07       | 3.66E+07  | 3.24E+07  | 3.89E+07  | 4.04E+07  | 3.17E+07  | 3.17E+07  | 5.04E+07             | 3.84E+07        | 1.78                       | 0.05582706                               |         |
| R04406    | Glyceraldehyde-3-phosphate dehydrogenase OS=Homo sapiens OX=9606 GN=GAPDH PE=1 SV=3                             | 82           | 4882   | 23                | 1.82E+09       | 1.71E+09       | 1.73E+09       | 1.64E+09       | 1.81E+09       | 1.91E+09       | 1.69E+09  | 1.72E+09  | 1.61E+09  | 1.60E+09  | 1.50E+09  | 1.55E+09  | 1.77E+09             | 1.63E+09        | 1.09                       | 0.013562483                              |         |
| P07900    | Heat shock protein HSP 90-alpha OS=Homo sapiens OX=9606 GN=HSP90AA1 PE=1 SV=5                                   | 50           | 1956   | 23                | 3.02E+08       | 2.93E+08       | 3.25E+08       | 3.36E+08       | 3.11E+08       | 2.85E+08       | 3.04E+08  | 3.40E+08  | 3.59E+08  | 3.17E+08  | 3.37E+08  | 2.82E+08  | 3.09E+08             | 3.02E+08        | 1.00                       | 0.322908266                              |         |
| P08195    | 4F2 cell-surface antigen heavy chain OS=Homo sapiens OX=9606 GN=SLC3A2 PE=1 SV=3                                | 40           | 505    | 23                | 2.10E+08       | 2.14E+08       | 1.84E+08       | 1.79E+08       | 1.76E+08       | 1.88E+08       | 8.27E+07  | 8.29E+07  | 5.68E+07  | 6.45E+07  | 7.38E+07  | 6.18E+07  | 1.92E+08             | 7.04E+07        | 2.73                       | 1.18049E-07                              |         |
| Q9Y5V9    | FACT complex subunit SPT16 OS=Homo sapiens OX=9606 GN=SPT16H PE=1 SV=1                                          | 29           | 295    | 23                | 7.51E+07       | 8.30E+07       | 8.24E+07       | 8.02E+07       | 8.72E+07       | 7.82E+07       | 4.55E+07  | 3.80E+07  | 4.33E+07  | 3.79E+07  | 3.80E+07  | 3.57E+07  | 7.76E+07             | 3.97E+07        | 1.95                       | 0.77842E-07                              |         |
| Q15149    | Plectin OS=Homo sapiens OX=9606 GN=PLEC PE=1 SV=3                                                               | 7            | 143    | 23                | 3.00E+07       | 3.30E+07       | 3.08E+07       | 3.88E+07       | 3.33E+07       | 3.19E+07       | 2.19E+07  | 1.83E+07  | 2.27E+07  | 2.31E+07  | 2.02E+07  | 1.84E+07  | 3.30E+07             | 2.08E+07        | 1.59                       | 0.285403E-08                             |         |
| P11589    | Alpha-enolase OS=Homo sapiens OX=9606 GN=ENO1 PE=1 SV=2                                                         | 49           | 1037   | 24                | 5.36E+08       | 6.02E+08       | 4.65E+08       | 4.48E+08       | 4.48E+08       | 5.69E+08       | 6.82E+08  | 4.69E+08  | 5.25E+08  | 5.39E+08  | 5.18E+08  | 5.04E+08  | 5.04E+08             | 5.04E+08        | 0.92                       | 0.256439E-08                             |         |
| R48643    | T-complex protein 1 subunit epsilon OS=Homo sapiens OX=9606 GN=CCT5 PE=1 SV=1                                   | 56           | 678    | 24                | 2.22E+08       | 2.23E+08       | 1.91E+08       | 2.00E+08       | 2.00E+08       | 2.06E+08       | 1.47E+08  | 1.56E+08  | 1.40E+08  | 1.28E+08  | 1.30E+08  | 1.09E+08  | 2.06E+08             | 1.35E+08        | 1.53                       | 0.61124491E-05                           |         |
| P50991    | T-complex protein 1 subunit delta OS=Homo sapiens OX=9606 GN=CCT4 PE=1 SV=4                                     | 51           | 660    | 24                | 2.95E+08       | 2.90E+08       | 2.69E+08       | 2.72E+08       | 2.43E+08       | 2.83E+08       | 1.98E+08  | 1.90E+08  | 1.63E+08  | 1.81E+08  | 1.71E+08  | 1.57E+08  | 2.75E+08             | 1.77E+08        | 1.56                       | 0.21589E-06                              |         |
| P19338    | Nucleolin OS=Homo sapiens OX=9606 GN=NCL PE=1 SV=3                                                              | 33           | 322    | 24                | 9.01E+07       | 8.93E+07       | 9.76E+07       | 1.31E+08       | 9.84E+07       | 1.05E+08       | 6.56E+07  | 6.26E+07  | 6.58E+07  | 6.45E+07  | 6.44E+07  | 5.27E+07  | 1.02E+08             | 6.15E+07        | 0.64                       | 0.000599336                              |         |
| P08758    | Annexin A5 OS=Homo sapiens OX=9606 GN=ANXA5 PE=1 SV=2                                                           | 80           | 991    | 25                | 5.08E+08       | 4.55E+08       | 4.84E+08       | 4.77E+08       | 5.04E+08       | 4.41E+08       | 3.91E+08  | 3.55E+08  | 3.40E+08  | 3.38E+08  | 3.74E+08  | 2.94E+08  | 4.78E+08             | 3.49E+08        | 1.37                       | 0.300974E-06                             |         |
| P73371    | T-complex protein 1 subunit beta OS=Homo sapiens OX=9606 GN=CCT2 PE=1 SV=4                                      | 61           | 555    | 25                | 2.83E+08       | 2.85E+08       | 2.43E+08       | 2.51E+08       | 2.35E+08       | 2.30E+08       | 1.92E+08  | 2.02E+08  | 1.80E+08  | 1.89E+08  | 1.84E+08  | 1.51E+08  | 2.55E+08             | 1.76E+08        | 1.44                       | 0.000124793                              |         |
| P11142    | Heat shock cognate 71 kDa protein OS=Homo sapiens OX=9606 GN=HSP7AB PE=1 SV=1                                   | 38           | 2437   | 25                | 6.22E+07       | 6.92E+07       | 6.95E+07       | 1.01E+08       | 9.65E+07       | 9.54E+07       | 1.01E+08  | 9.02E+08  | 9.29E+08  | 9.72E+08  | 9.23E+08  | 9.23E+08  | 9.23E+08             | 9.23E+08        | 1.05                       | 0.000234768                              |         |
| P40227    | T-complex protein 1 subunit zeta OS=Homo sapiens OX=9606 GN=CCT6A PE=1 SV=3                                     | 53           | 709    | 26                | 2.97E+08       | 2.95E+08       | 2.92E+08       | 3.03E+08       | 3.06E+08       | 2.83E+08       | 2.21E+08  | 2.17E+08  | 2.05E+08  | 1.92E+08  | 2.01E+08  | 1.77E+08  | 2.96E+08             | 2.02E+08        | 1.46                       | 0.5516712E-06                            |         |
| P13010    | X-ray repair cross-complementing protein 5 OS=Homo sapiens OX=9606 GN=XRCC5 PE=1 SV=3                           | 53           | 374    | 26                | 1.10E+08       | 1.14E+08       | 1.09E+08       | 1.01E+08       | 1.12E+08       | 1.13E+08       | 7.94E+07  | 8.32E+07  | 7.40E+07  | 7.05E+07  | 6.78E+07  | 6.29E+07  | 1.10E+08             | 7.30E+07        | 1.51                       | 4.82714E-06                              |         |
| P17987    | T-complex protein 1 subunit alpha OS=Homo sapiens OX=9606 GN=TCP1 PE=1 SV=1                                     | 66           | 692    | 26                | 2.89E+08       | 3.16E+08       | 3.03E+08       | 2.56E+08       | 2.93E+08       | 2.80E+08       | 2.04E+08  | 2.37E+08  | 1.97E+08  | 2.10E+08  | 2.14E+08  | 1.72E+08  | 2.90E+08             | 2.05E+08        | 1.41                       | 0.373317E-06                             |         |
| Q8VUM4    | Programmed cell death 6-interacting protein OS=Homo sapiens OX=9606 GN=PCDD6IP PE=1 SV=1                        | 41           | 379    | 26                | 8.91E+07       | 9.65E+07       | 9.91E+07       | 9.75E+07       | 9.05E+07       | 9.14E+07       | 8.57E+07  | 7.93E+07  | 8.23E+07  | 8.04E+07  | 8.38E+07  | 7.47E+07  | 9.38E+07             | 8.10E+07        | 1.16                       | 0.000202288                              |         |
| Q14152    | Eukaryotic translation initiation factor 3 subunit A OS=Homo sapiens OX=9606 GN=EIF3A PE=1 SV=1                 | 21           | 374    | 26                | 1.17E+08       | 1.15E+08       | 1.11E+08       | 1.12E+08       | 8.94E+07       | 1.05E+08       | 6.75E+07  | 6.15E+07  | 6.26E+07  | 6.03E+07  | 5.66E+07  | 6.17E+07  | 1.09E+08             | 6.15E+07        | 1.76                       | 0.32698E-05                              |         |
| P0DMV9    | Heat shock 70 kDa protein 1B OS=Homo sapiens OX=9606 GN=HSPA1B PE=1 SV=1                                        | 63           | 974    | 27                | 8.82E+07       | 8.87E+07       | 8.84E+07       | 8.95E+07       | 8.95E+07       | 6.63E+07       | 6.79E+07  | 6.89E+07  | 6.84E+07  | 6.84E+07  | 6.77E+07  | 6.77E+07  | 6.77E+07             | 6.77E+07        | 0.82                       | 0.110239774                              |         |
| P49368    | T-complex protein 1 subunit gamma OS=Homo sapiens OX=9606 GN=CCT3 PE=1 SV=4                                     | 54           | 599    | 27                | 2.47E+08       | 2.40E+08       | 1.93E+08       | 1.83E+08       | 1.84E+08       | 1.15E+08       | 1.59E+08  | 1.58E+08  | 1.24E+08  | 1.40E+08  | 1.33E+08  | 1.34E+08  | 2.10E+08             | 1.41E+08        | 1.49                       | 0.0008459                                |         |
| P13193    | Bifunctional purine biosynthesis protein PURH OS=Homo sapiens OX=9606 GN=ATIC PE=1 SV=3                         | 57           | 530    | 27                | 1.55E+08       | 1.54E+08       | 1.45E+08       | 1.47E+08       | 1.55E+08       | 1.25E+08       | 1.82E+08  | 1.85E+08  | 1.57E+08  | 1.53E+08  | 1.56E+08  | 1.37E+08  | 1.48E+08             | 1.62E+08        | 0.57                       | 0.151560445                              |         |
| Q98932    | T-complex protein 1 subunit eta OS=Homo sapiens OX=9606 GN=CCT7 PE=1 SV=4                                       | 61           | 772    | 28                | 3.51E+08       | 3.48E+08       | 3.08E+08       | 3.07E+08       | 3.34E+08       | 3.28E+08       | 2.33E+08  | 2.52E+08  | 2.20E+08  | 2.33E+08  | 2.34E+08  | 2.02E+08  | 3.29E+08             | 2.29E+08        | 1.44                       | 0.2210E-06                               |         |
| P05565    | Integrin beta-1 OS=Homo sapiens OX=9606 GN=ITGB1 PE=1 SV=2                                                      | 36           | 775    | 28                | 2.83E+08       | 3.06E+08       | 3.73E+08       | 3.77E+08       | 3.84E+08       | 3.64E+08       | 3.69E+08  | 2.76E+08  | 2.39E+08  | 2.89E+08  | 2.21E+08  | 2.18E+08  | 3.75E+08             | 2.42E+08        | 1.50                       | 1.13194E-05                              |         |
| P11589    | C-1-naphtholase synthase, cytoplasmic OS=Homo sapiens OX=9606 GN=NMTHFD1 PE=1 SV=3                              | 26           | 321    | 28                | 1.37E+08       | 1.45E+08       | 1.38E+08       | 1.32E+08       | 1.21E+08       | 1.23E+08       | 1.83E+08  | 1.82E+08  | 1.25E+08  | 1.35E+08  | 1.31E+08  | 1.29E+08  | 1.32E+08             | 1.32E+08        | 1.06                       | 0.000267897                              |         |
| P08074    | Poly (ADP-ribose) polymerase 1 OS=Homo sapiens OX=9606 GN=PARP1 PE=1 SV=4                                       | 40           | 499    | 30                | 2.05E+08       | 1.95E+08       | 2.07E+08       | 2.09E+08       | 2.01E+08       | 1.95E+08       | 1.08E+08  | 1.04E+08  | 9.42E+07  | 9.77E+07  | 8.86E+07  | 8.98E+07  | 2.02E+08             | 9.70E+07        | 2.08                       | 0.165545E-10                             |         |
| P53621    | Cotaster subunit alpha OS=Homo sapiens OX=9606 GN=COPA PE=1 SV=2                                                | 34           | 420    | 30                | 2.86E+08       | 2.80E+08       | 3.24E+08       | 4.11E+08       | 4.45E+08       | 3.24E+08       | 3.67E+08  | 3.78E+08  | 4.07E+08  | 6.55E+08  | 5.21E+08  | 3.01E+08  | 3.45E+08             | 4.23E+08        | -0.29                      | 0.148602083                              |         |
| P41252    | Isoleucine--rRNA ligase, cytoplasmic OS=Homo sapiens OX=9606 GN=IARS PE=1 SV=2                                  | 32           | 497    | 30                | 1.33E+08       | 1.45E+08       | 1.15E+08       | 1.29E+08       | 1.26E+08       | 1.26E+08       | 8.39E+07  | 7.54E+07  | 7.54E+07  | 7.08E+07  | 7.22E+07  | 7.20E+07  | 7.20E+07             | 7.48E+07        | 1.72                       | 0.489517E-07                             |         |
| P98160    | Basement membrane-specific heparan sulfate proteoglycan core protein OS=Homo sapiens OX=9606 GN=HSPG2 PE=1 SV=1 | 10           | 269    | 30                | 9.29E+07       | 6.69E+07       | 5.83E+07       | 6.04E+07       | 5.34E+07       | 6.05E+07       | 9.00E+07  | 8.58E+07  | 5.08E+07  | 5.65E+07  | 5.69E+07  | 6.93E+07  | 6.54E+07             | 6.82E+07        | -0.06                      | 0.758444528                              |         |
| Q8P2D9    | Ple-mRNA-processing-splicing factor 8 OS=Homo sapiens OX=9606 GN=PRPF8 PE=1 SV=2                                | 19           | 225    | 30                | 6.09E+07       | 5.59E+07       | 5.37E+07       | 4.86E+07       |                |                |           |           |           |           |           |           |                      |                 |                            |                                          |         |
